# Supplementary material
Source: ML conference proceedings conference paper supplement (https://openreview.net/forum?id=KculbVVCly)
Supplement: supplementary_material [file gnk_8_density_mc.pdf › multilevel-sbi-main/figure/gnk_8_density_mc.pdf]

-- (Almost) exact

— MLMC (300)

— MC (high)

— MC (low)

0.50

0.25

0.00

0

20

2

1

0

0

20

0.4

0.2

0.0

0

20

0.2

0.1

0.0

0

20

0.50

0.25

0.00

0

20

0.5

0.0

0

20

0.4

0.2

0.0

0

20

0.2

0.1

0.0

0

20

0.50

0.25

0.00

0

20

0.5

0.0

0

20

0.4

0.2

0.0

0

20

0.2

0.1

0.0

0

20

0.50

0.25

0.00

0

20

0.5

0.0

0

20

0.4

0.2

0.0

0

20

0.2

0.1

0.0

0

20

0.50

0.25

0.00

0

20

0.5

0.0

0

20

0.4

0.2

0.0

0

20

0.2

0.1

0.0

0

20

0.50

0.25

0.00

0

20

0.5

0.0

0

20

0.4

0.2

0.0

0

20

0.2

0.1

0.0

0

20

0.50

0.25

0.00

0

20

0.5

0.0

0

20

0.4

0.2

0.0

0

20

0.2

0.1

0.0

0

20

0.50

0.25

0.00

0

20

0.5

0.0

0

20

0.4

0.2

0.0

0

20

0.2

0.1

0.0

0

20

0.50

0.25

0.00

0

20

0.5

0.0

0

20

0.4

0.2

0.0

0

20

0.2

0.1

0.0

0

20

0.50

0.25

0.00

0

20

0.5

0.0

0

20

0.4

0.2

0.0

0

20

0.2

0.1

0.0

0

20

0.50

0.25

0.00

0

20

0.5

0.0

0

20

0.4

0.2

0.0

0

20

0.2

0.1

0.0

0

20

0.50

0.25

0.00

0

20

0.5

0.0

0

20

0.4

0.2

0.0

0

20

0.2

0.1

0.0

0

20

0.50

0.25

0.00

0

20

0.5

0.0

0

20

0.4

0.2

0.0

0

20

0.2

0.1

0.0

0

20

0.50

0.25

0.00

0

20

0.5

0.0

0

20

0.4

0.2

0.0

0

20

0.2

0.1

0.0

0

20

0.50

0.25

0.00

0

20

0.5

0.0

0

20

0.4

0.2

0.0

0

20

0.2

0.1

0.0

0

20

0.50

0.25

0.00

0

20

0.5

0.0

0

20

0.4

0.2

0.0

0

20

0.2

0.1

0.0

0

20

0.50

0.25

0.00

0

20

0.5

0.0

0

20

0.4

0.2

0.0

0

20

0.2

0.1

0.0

0

20

0.50

0.25

0.00

0

20

0.5

0.0

0

20

0.4

0.2

0.0

0

20

0.2

0.1

0.0

0

20

0.50
