# Supplementary material
Source: ML conference proceedings conference paper supplement (https://openreview.net/forum?id=KculbVVCly)

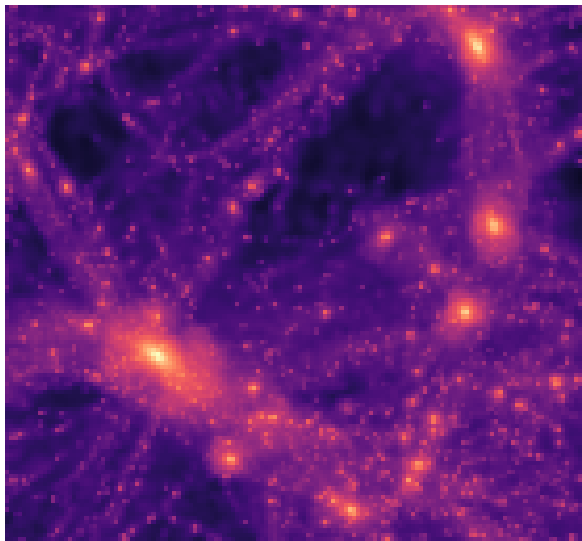

Low-fidelity

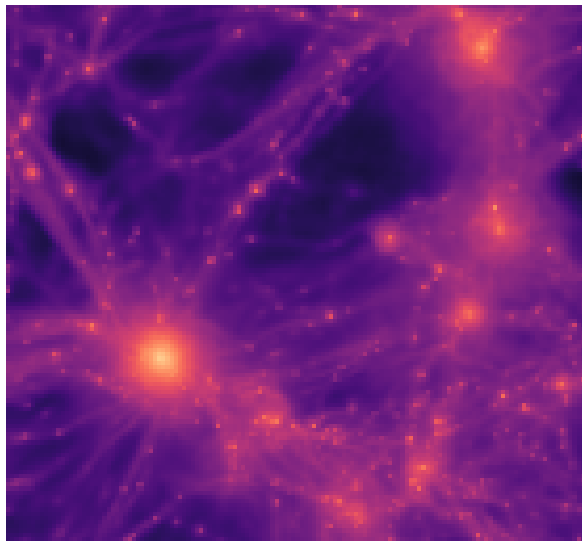

High-fidelity

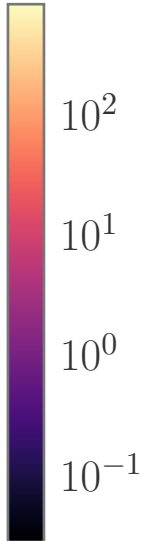

Supplement: supplementary_material [file camels_example.pdf › multilevel-sbi-main/figure/camels_example.pdf]

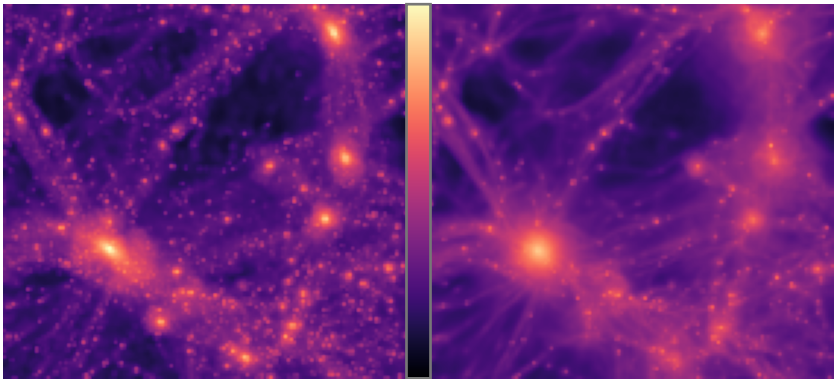

Low-fidelity

High-fidelity

Supplement: supplementary_material [file camels_example_2.pdf › multilevel-sbi-main/figure/camels_example_2.pdf]

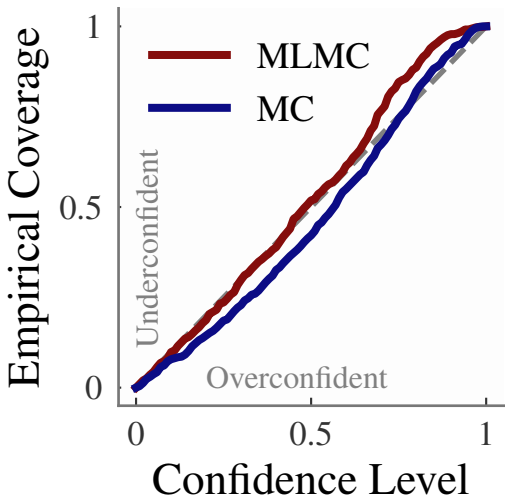

Supplement: supplementary_material [file cosmo_coverage_2param.pdf › multilevel-sbi-main/figure/cosmo_coverage_2param.pdf]

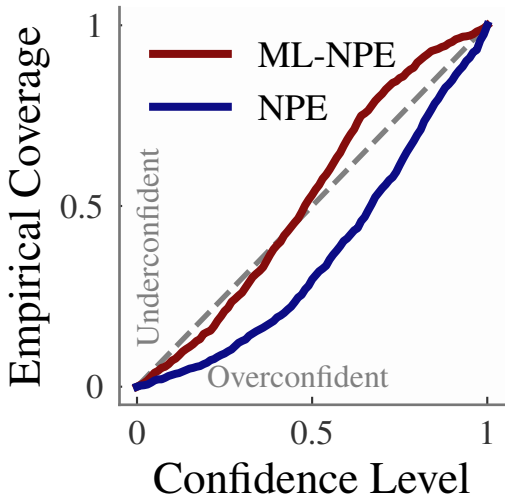

Supplement: supplementary_material [file cosmo_coverage_one_param.pdf › multilevel-sbi-main/figure/cosmo_coverage_one_param.pdf]

NLPD

60

40

20

0

MLMC

MC

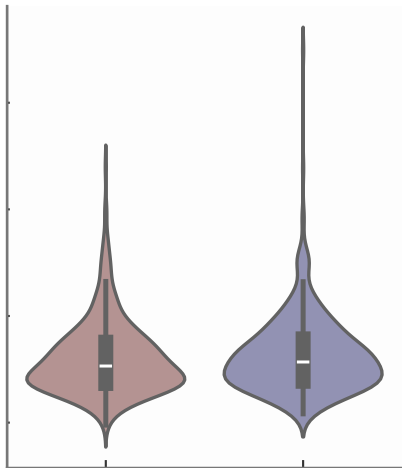

Supplement: supplementary_material [file cosmo_nlpd.pdf › multilevel-sbi-main/figure/cosmo_nlpd.pdf]

NLPD

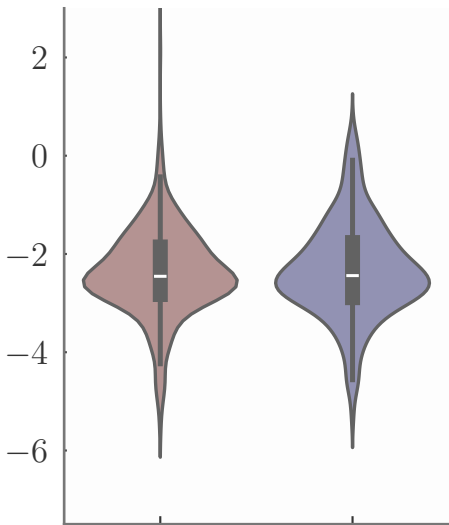

MLMC(700, 300)

MC(300)

Supplement: supplementary_material [file cosmo_nlpd_2param.pdf › multilevel-sbi-main/figure/cosmo_nlpd_2param.pdf]

NLPD

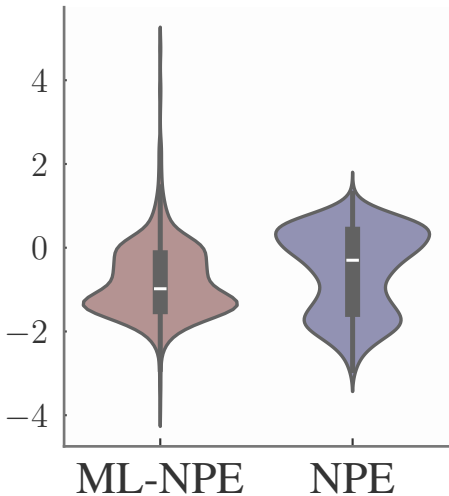

Supplement: supplementary_material [file cosmo_nlpd_one_param.pdf › multilevel-sbi-main/figure/cosmo_nlpd_one_param.pdf]

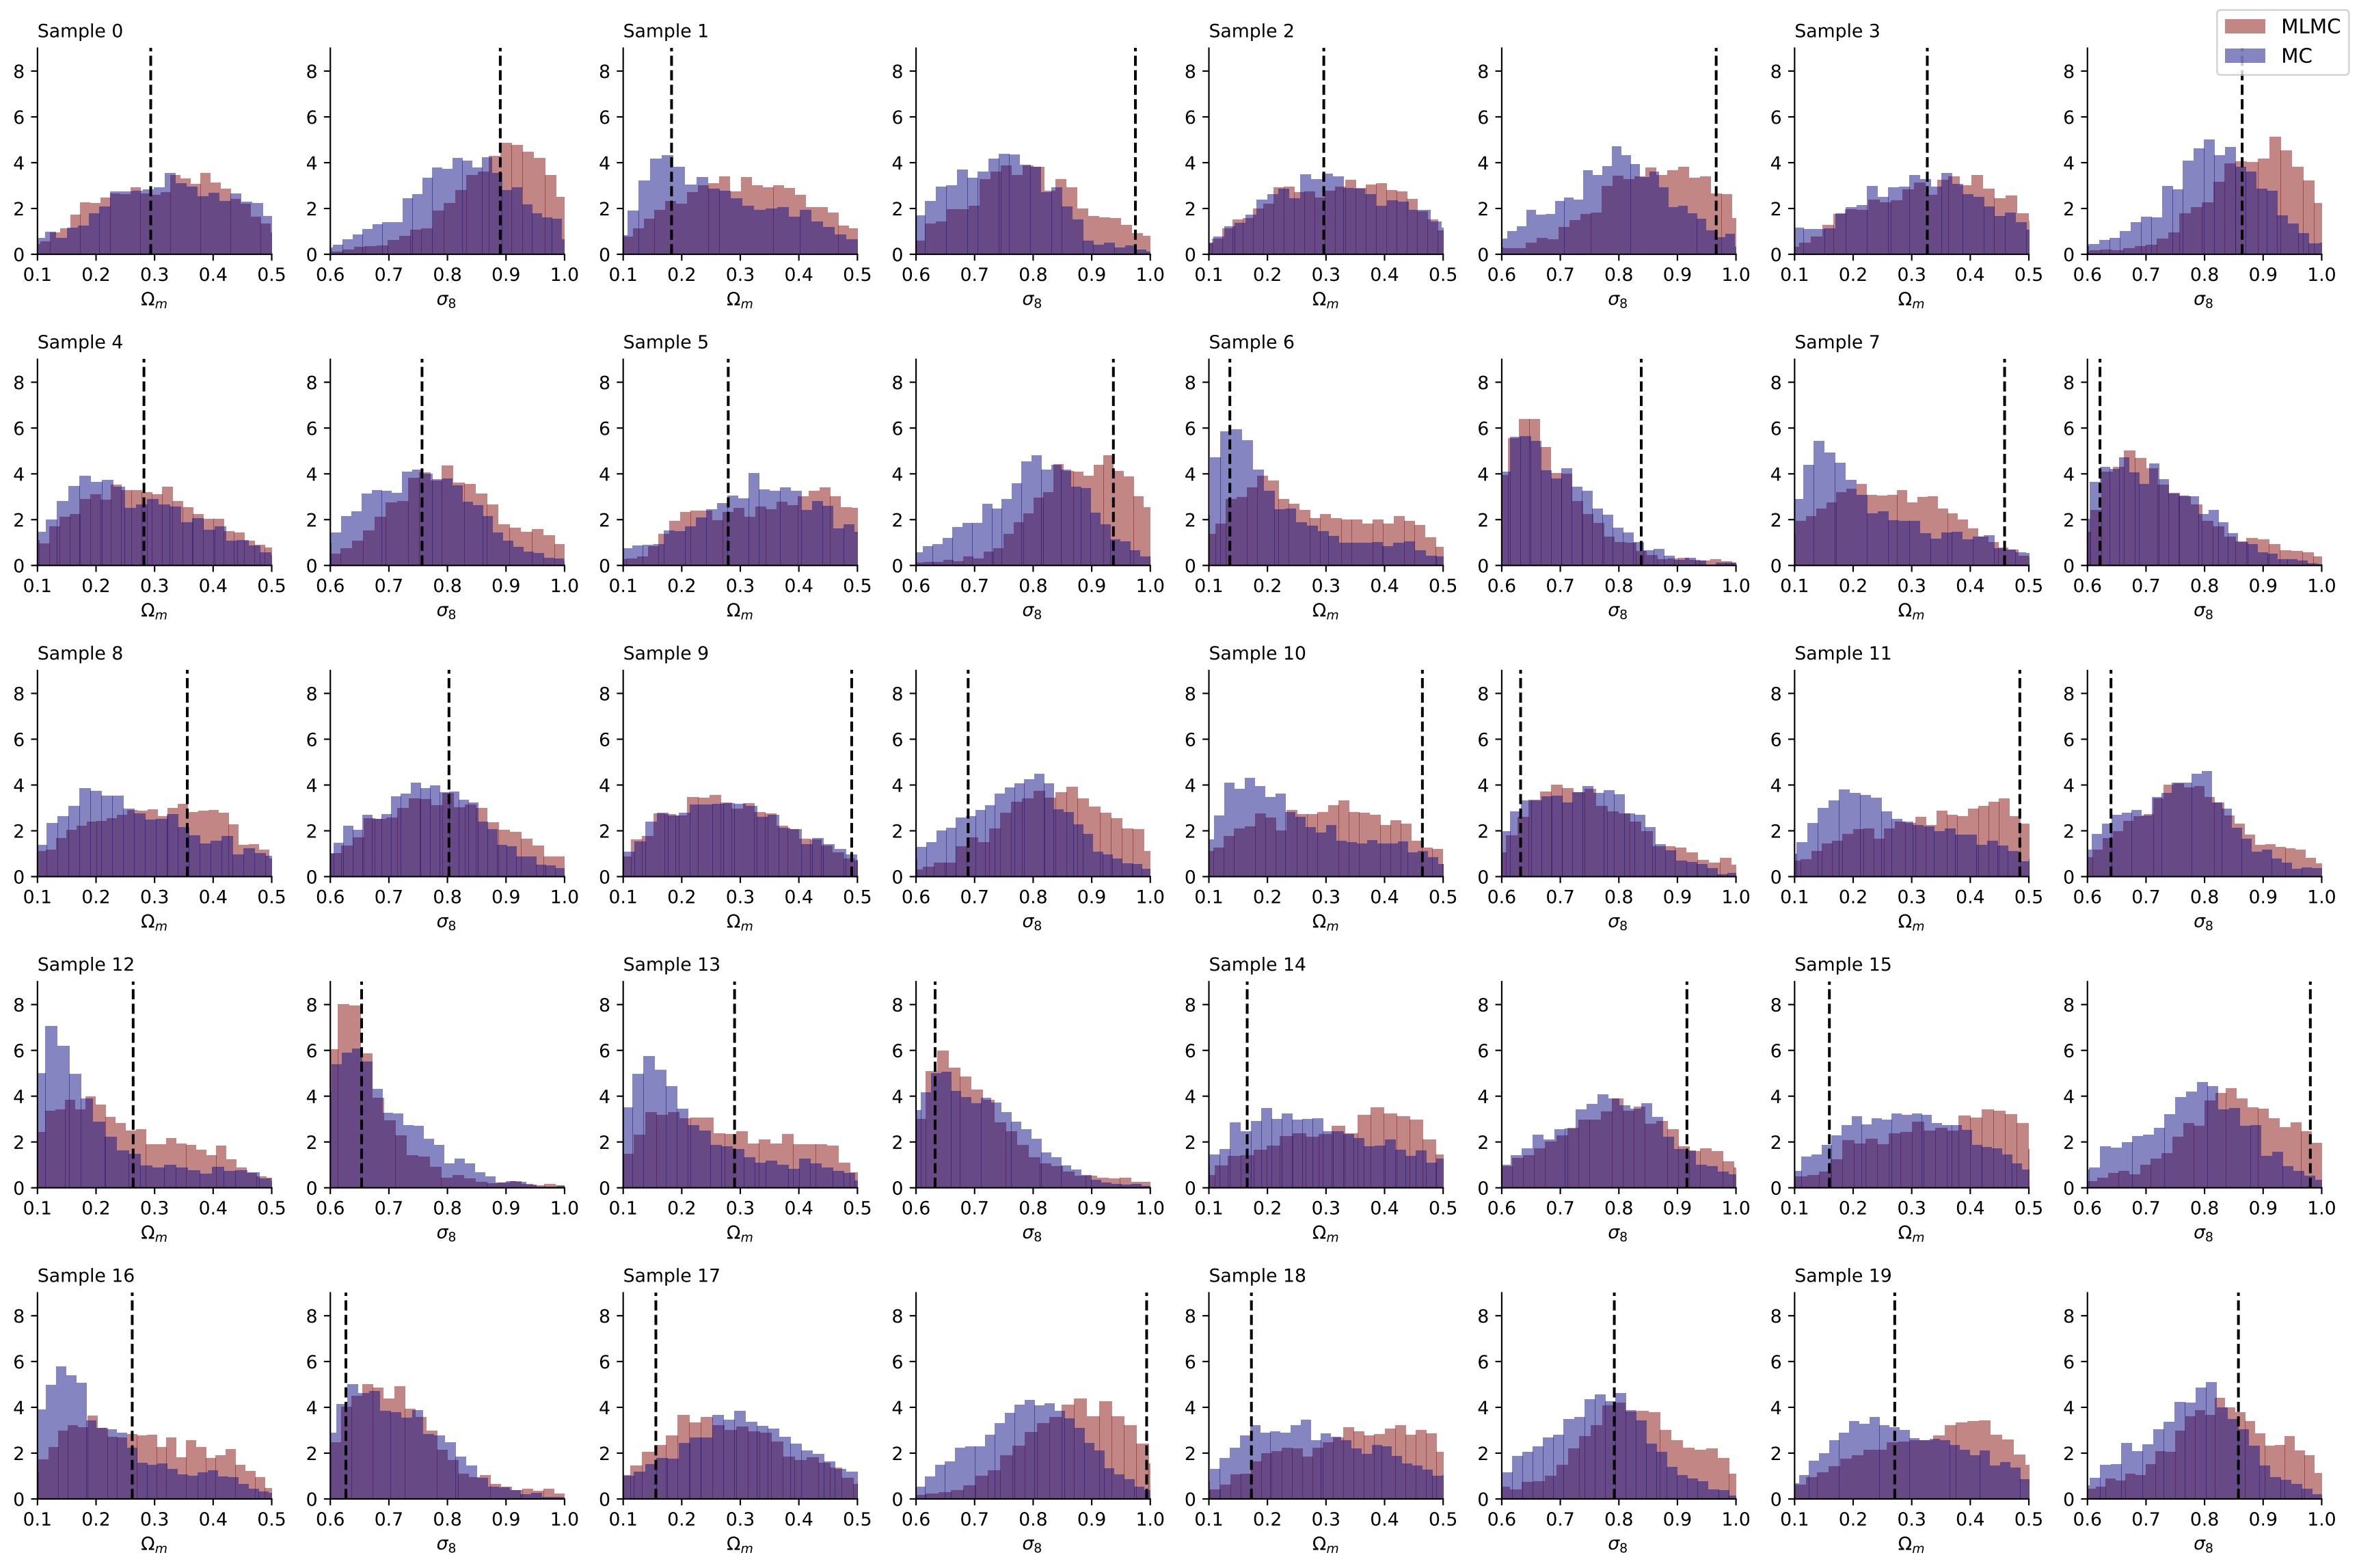

Supplement: supplementary_material [file cosmo_one_posterior_2param.pdf › multilevel-sbi-main/figure/cosmo_one_posterior_2param.pdf]

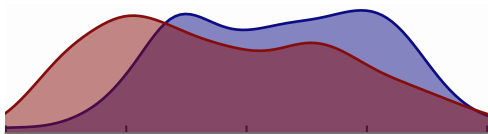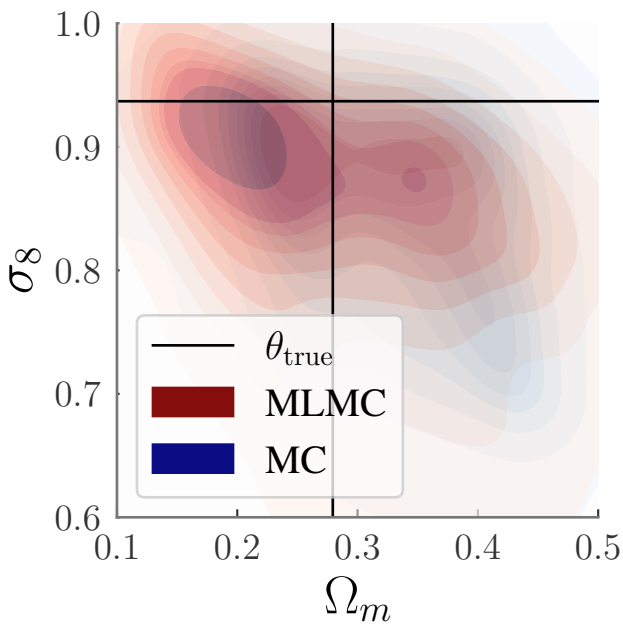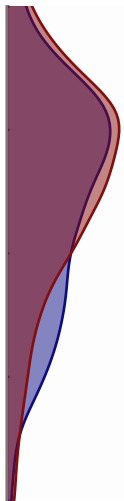

Supplement: supplementary_material [file cosmo_posterior.pdf › multilevel-sbi-main/figure/cosmo_posterior.pdf]

NPE

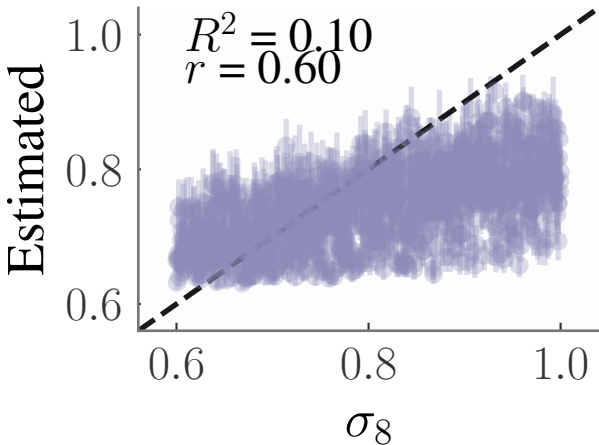

Supplement: supplementary_material [file cosmo_recovery_mc.pdf › multilevel-sbi-main/figure/cosmo_recovery_mc.pdf]

# ML-NPE

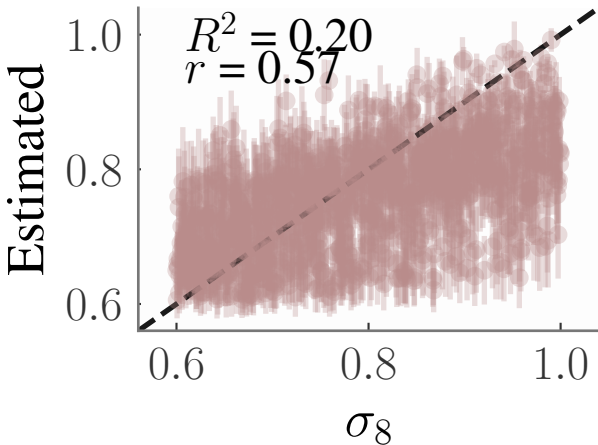

Supplement: supplementary_material [file cosmo_recovery_mlmc.pdf › multilevel-sbi-main/figure/cosmo_recovery_mlmc.pdf]

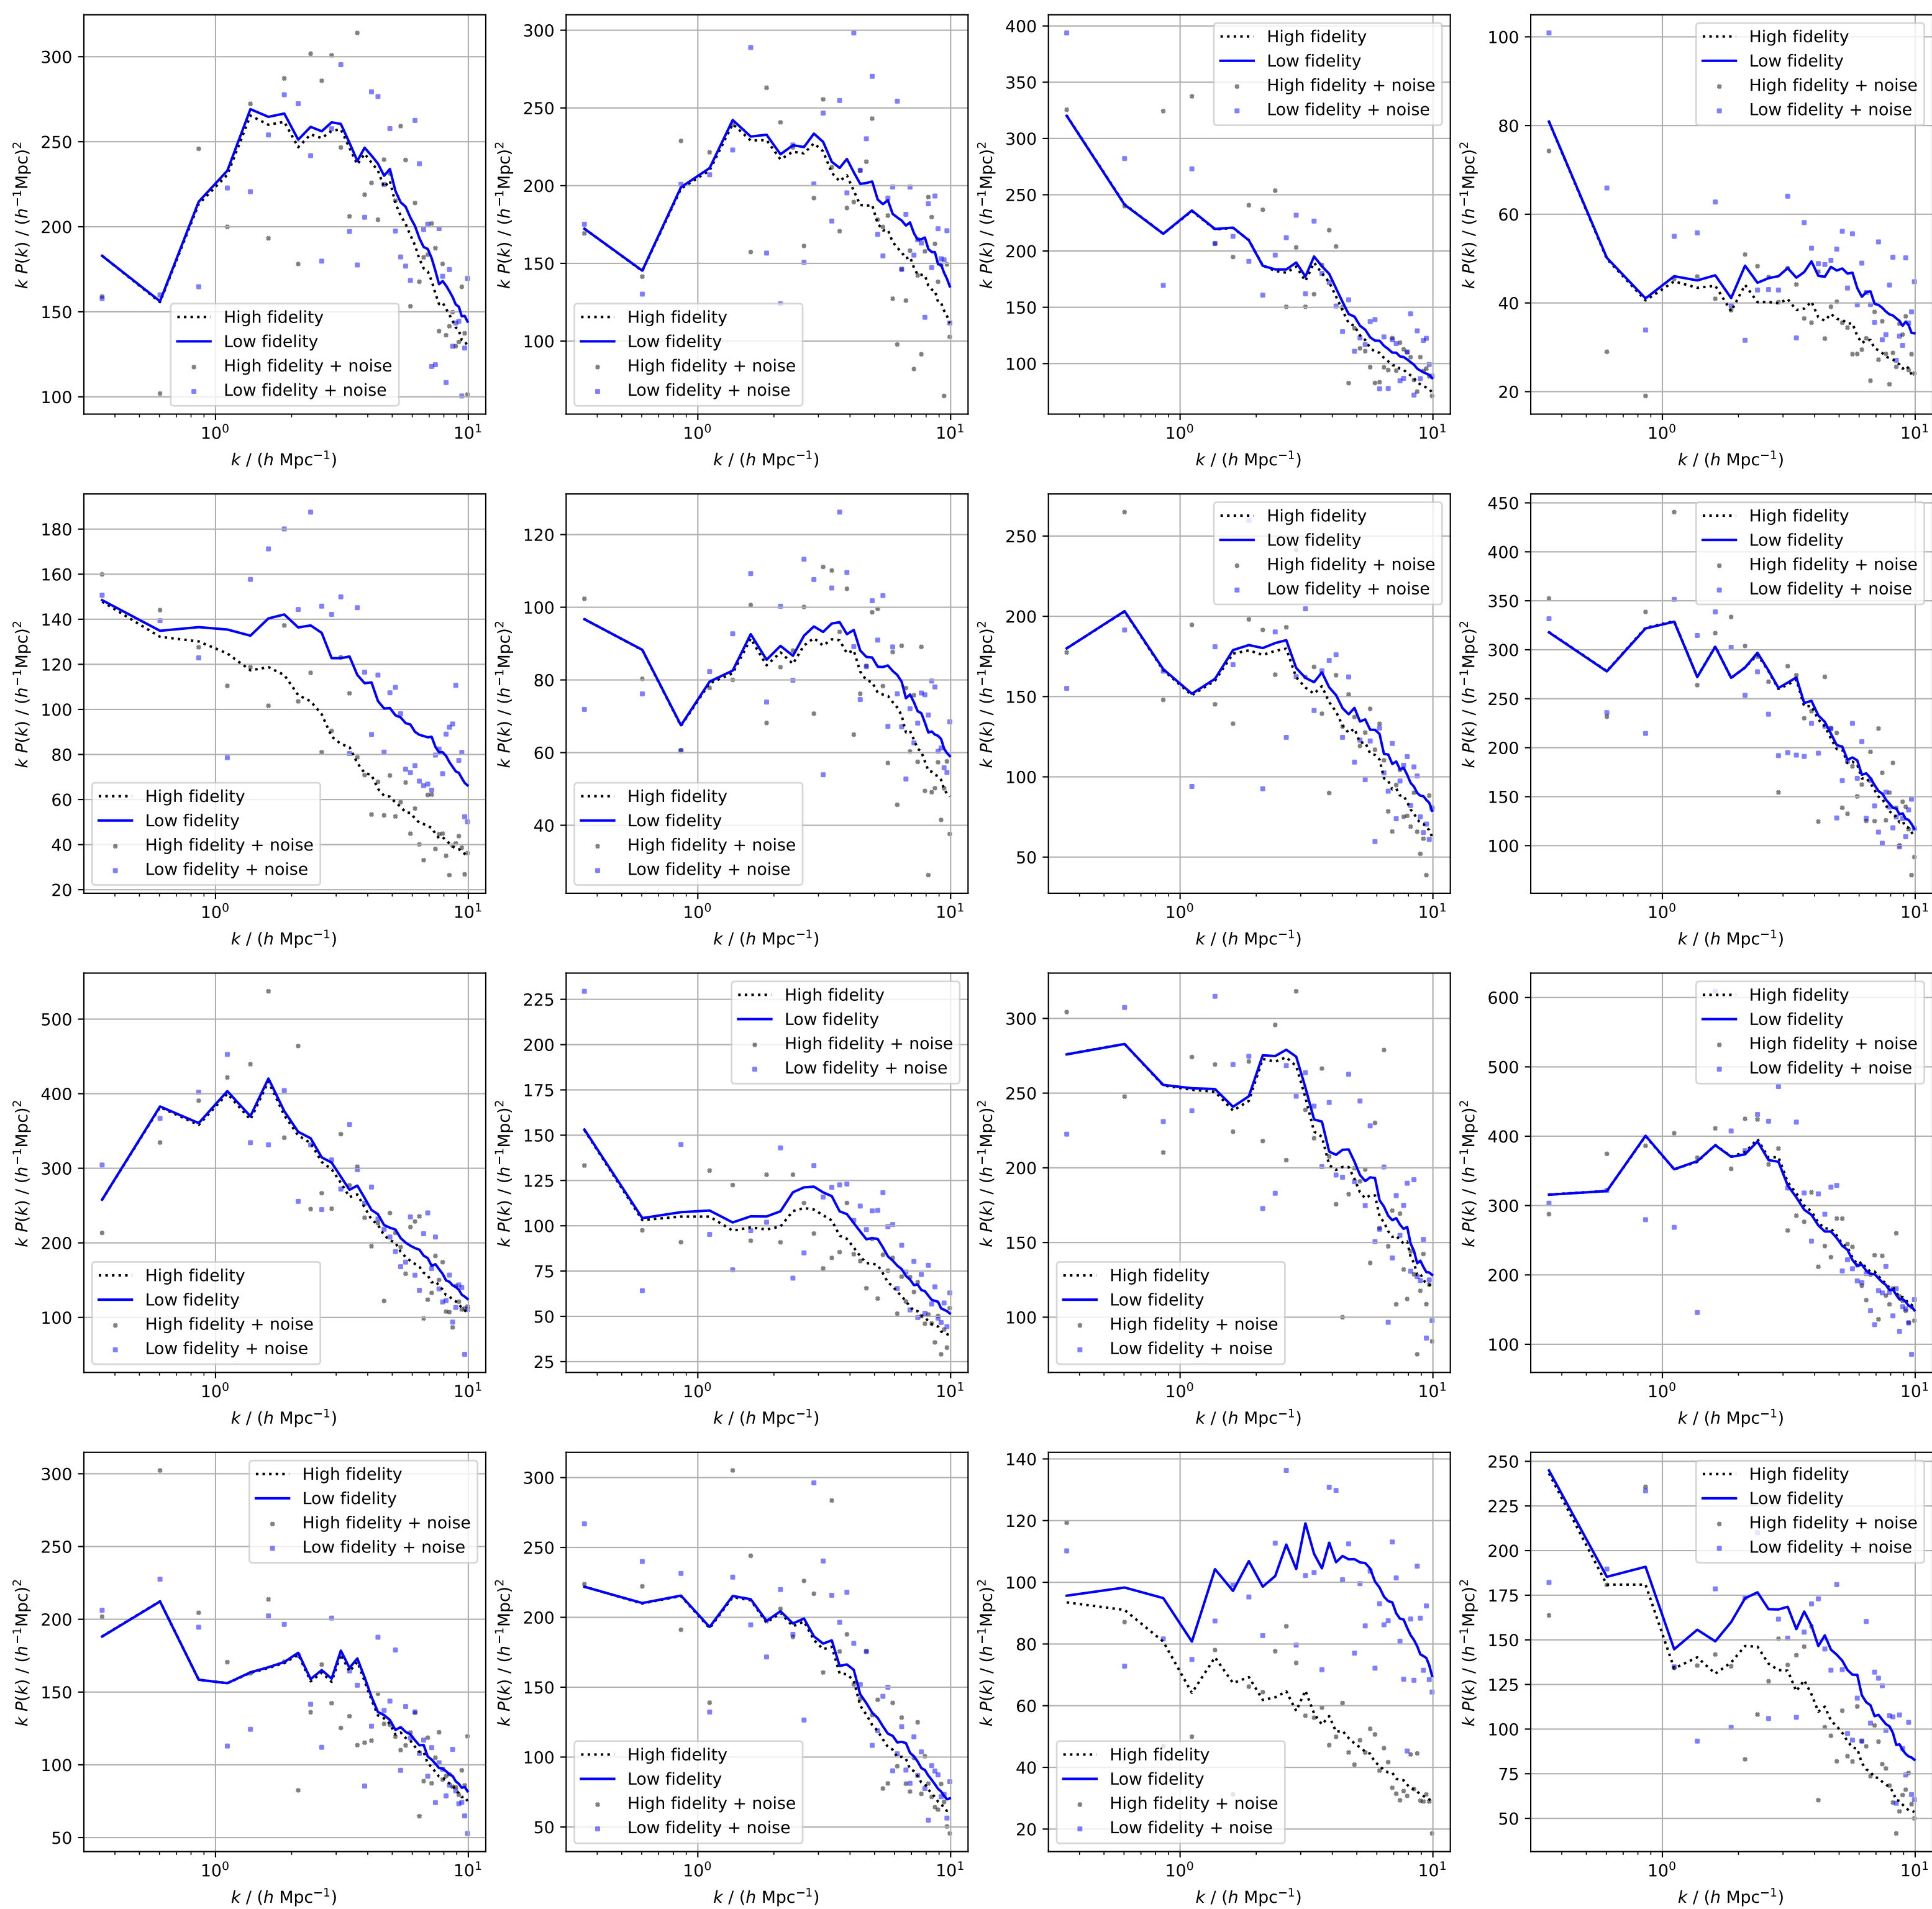

Supplement: supplementary_material [file cosmology_high_and_low.pdf › multilevel-sbi-main/figure/cosmology_high_and_low.pdf]

# High-fidelity

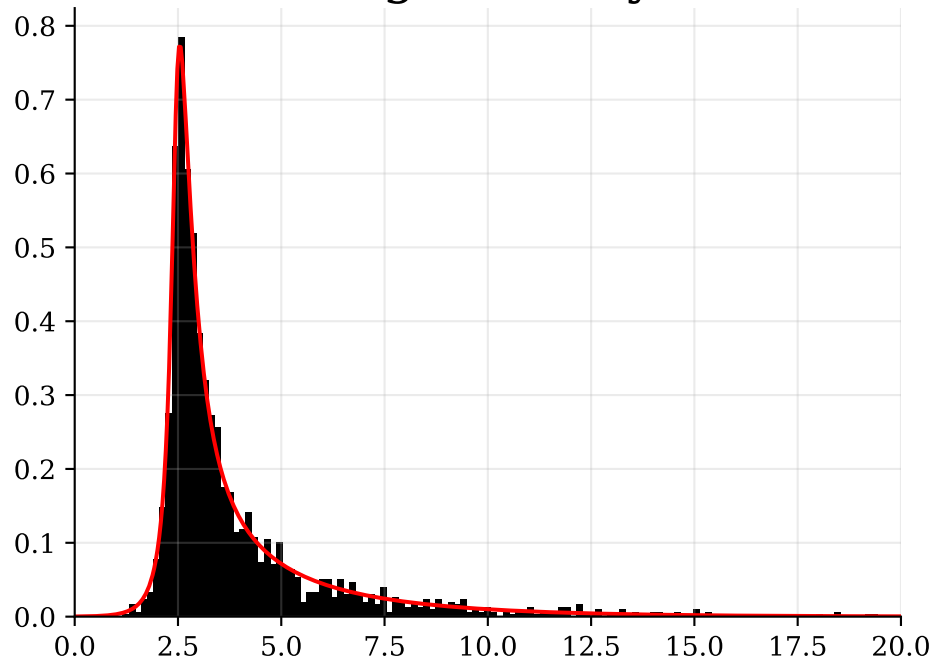

# Low-fidelity

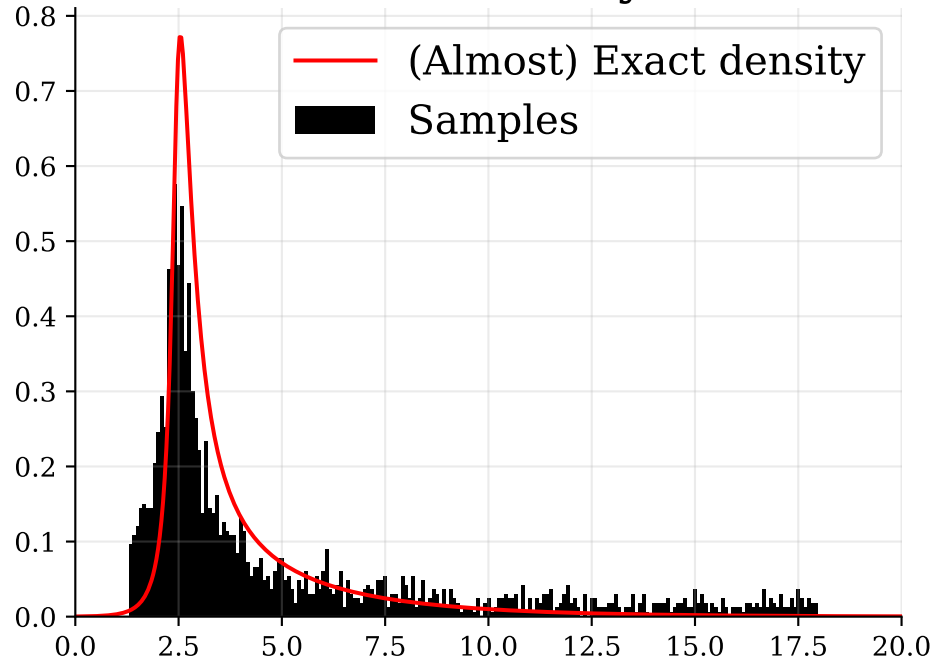

Supplement: supplementary_material [file g_and_k_low_and_high.pdf › multilevel-sbi-main/figure/g_and_k_low_and_high.pdf]

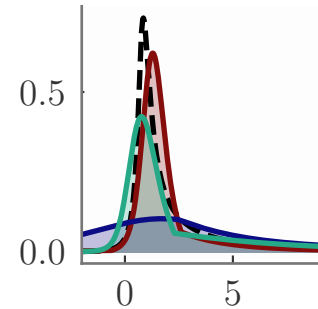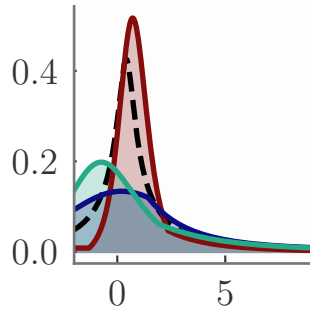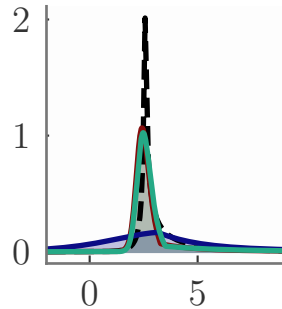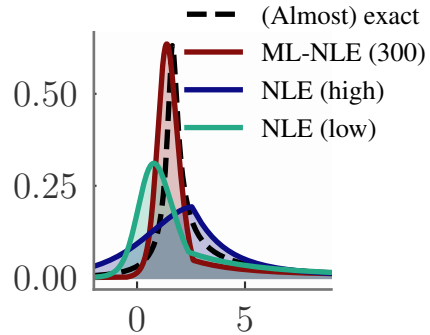

Supplement: supplementary_material [file gnk_4_density_mc.pdf › multilevel-sbi-main/figure/gnk_4_density_mc.pdf]

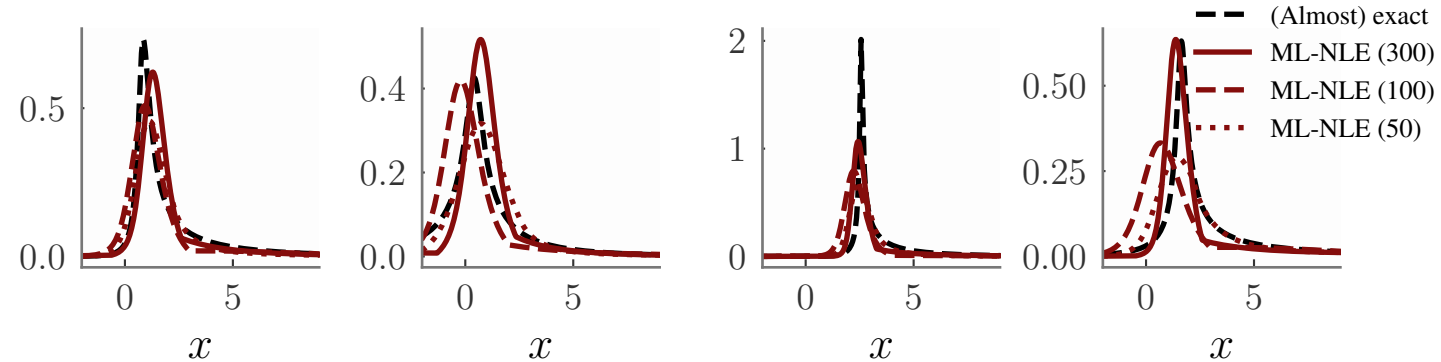

Supplement: supplementary_material [file gnk_4_density_mlmc.pdf › multilevel-sbi-main/figure/gnk_4_density_mlmc.pdf]

--- (Almost) exact

— MLMC (300)

- - - MLMC (100)

... MLMC (50)

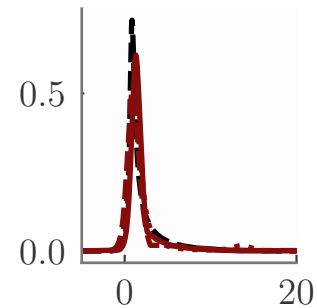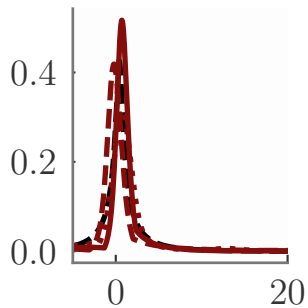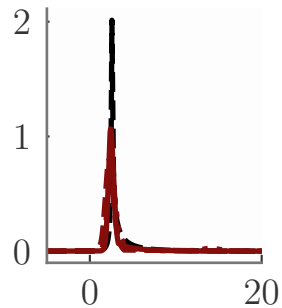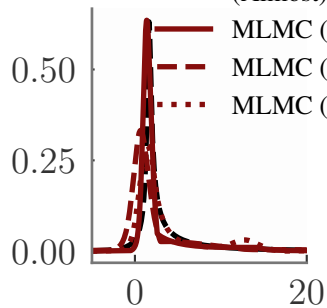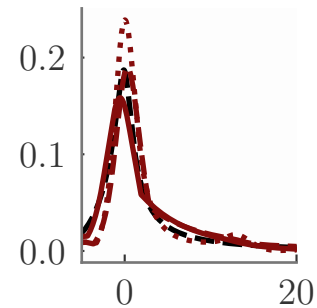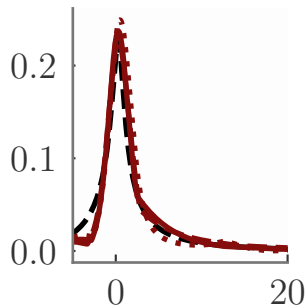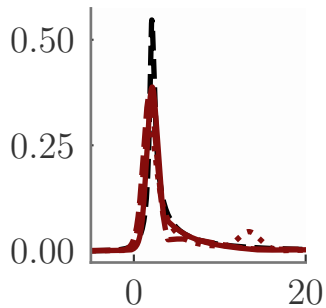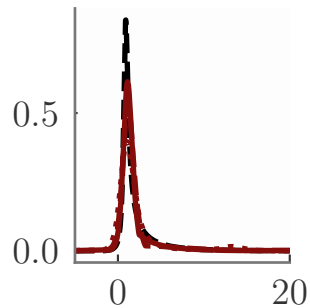

Supplement: supplementary_material [file gnk_8_density_mlmc.pdf › multilevel-sbi-main/figure/gnk_8_density_mlmc.pdf]

NLPD

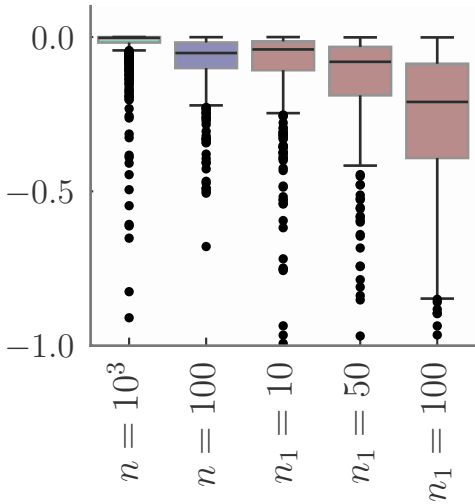

Supplement: supplementary_material [file gnk_NLPD_NPE.pdf › multilevel-sbi-main/figure/gnk_NLPD_NPE.pdf]

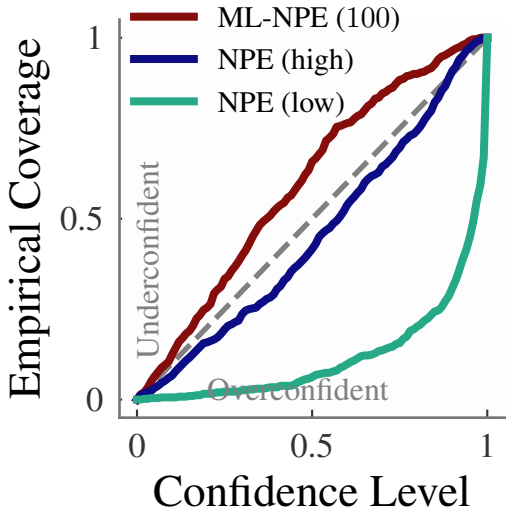

Supplement: supplementary_material [file gnk_coverage.pdf › multilevel-sbi-main/figure/gnk_coverage.pdf]

Density

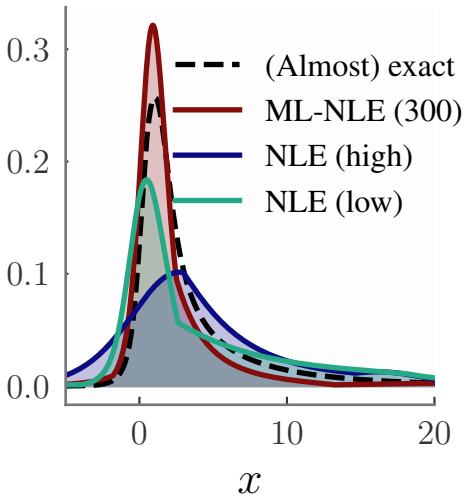

Supplement: supplementary_material [file gnk_density_approximation_comparisoin_NLE.pdf › multilevel-sbi-main/figure/gnk_density_approximation_comparisoin_NLE.pdf]

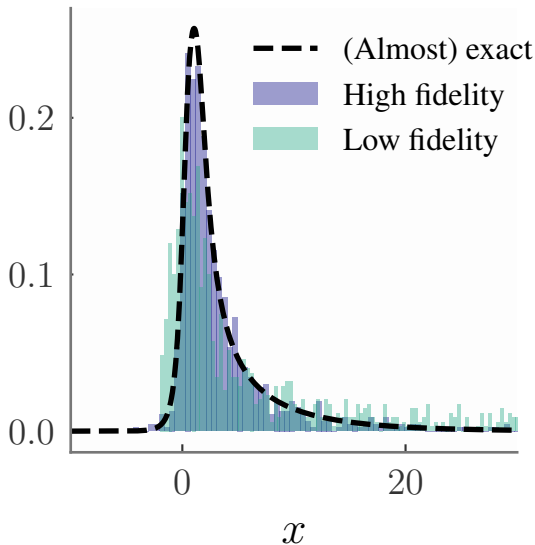

Supplement: supplementary_material [file gnk_density_low_high_fidelity.pdf › multilevel-sbi-main/figure/gnk_density_low_high_fidelity.pdf]

ISE

$10^2$   
 $10^0$

$n = 10^4$

$n = 300$

$n_1 = 50$

$n_1 = 100$

$n_1 = 300$

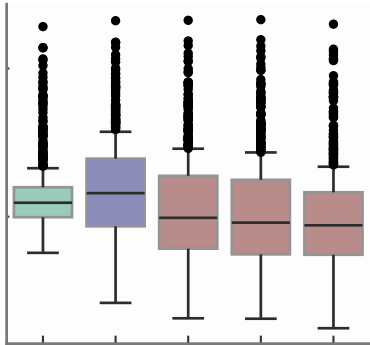

Supplement: supplementary_material [file gnk_ise_NLE.pdf › multilevel-sbi-main/figure/gnk_ise_NLE.pdf]

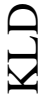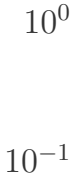

Supplement: supplementary_material [file gnk_kl_NLE.pdf › multilevel-sbi-main/figure/gnk_kl_NLE.pdf]

KLD

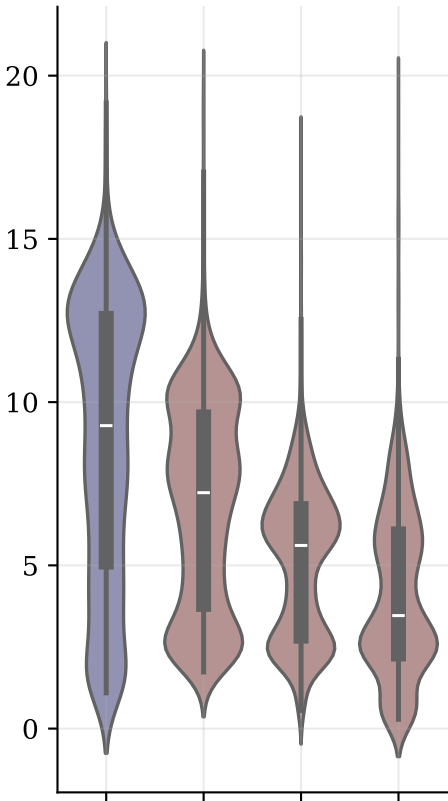

MC(low)

200:1

20:1

10:1

Supplement: supplementary_material [file gnk_kl_NLE_violin.pdf › multilevel-sbi-main/figure/gnk_kl_NLE_violin.pdf]

Avg. KLD

30

20

10

0

0.1

1

10

$10^2$

$10^3$

$10^4$

$\lambda$

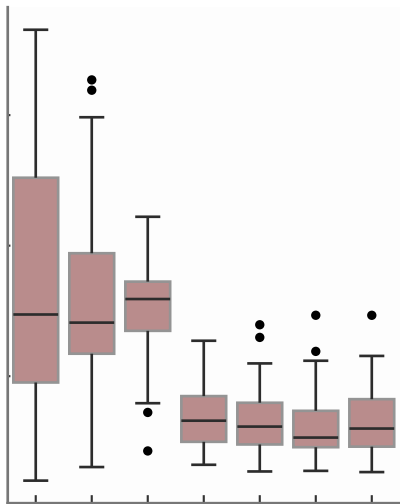

Supplement: supplementary_material [file gnk_kl_lambda_NLE.pdf › multilevel-sbi-main/figure/gnk_kl_lambda_NLE.pdf]

$\lambda$ 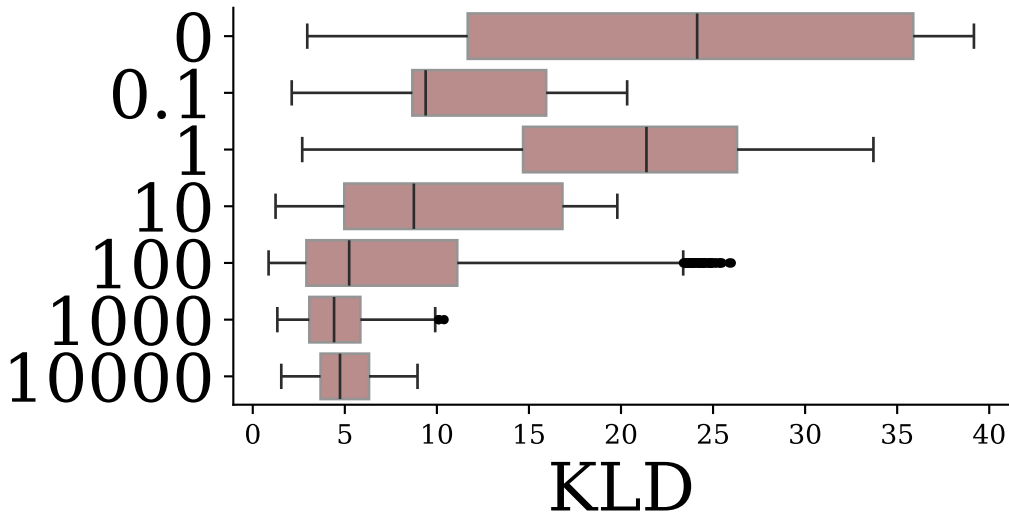

Supplement: supplementary_material [file gnk_kl_lambda_NLE_2.pdf › multilevel-sbi-main/figure/gnk_kl_lambda_NLE_2.pdf]

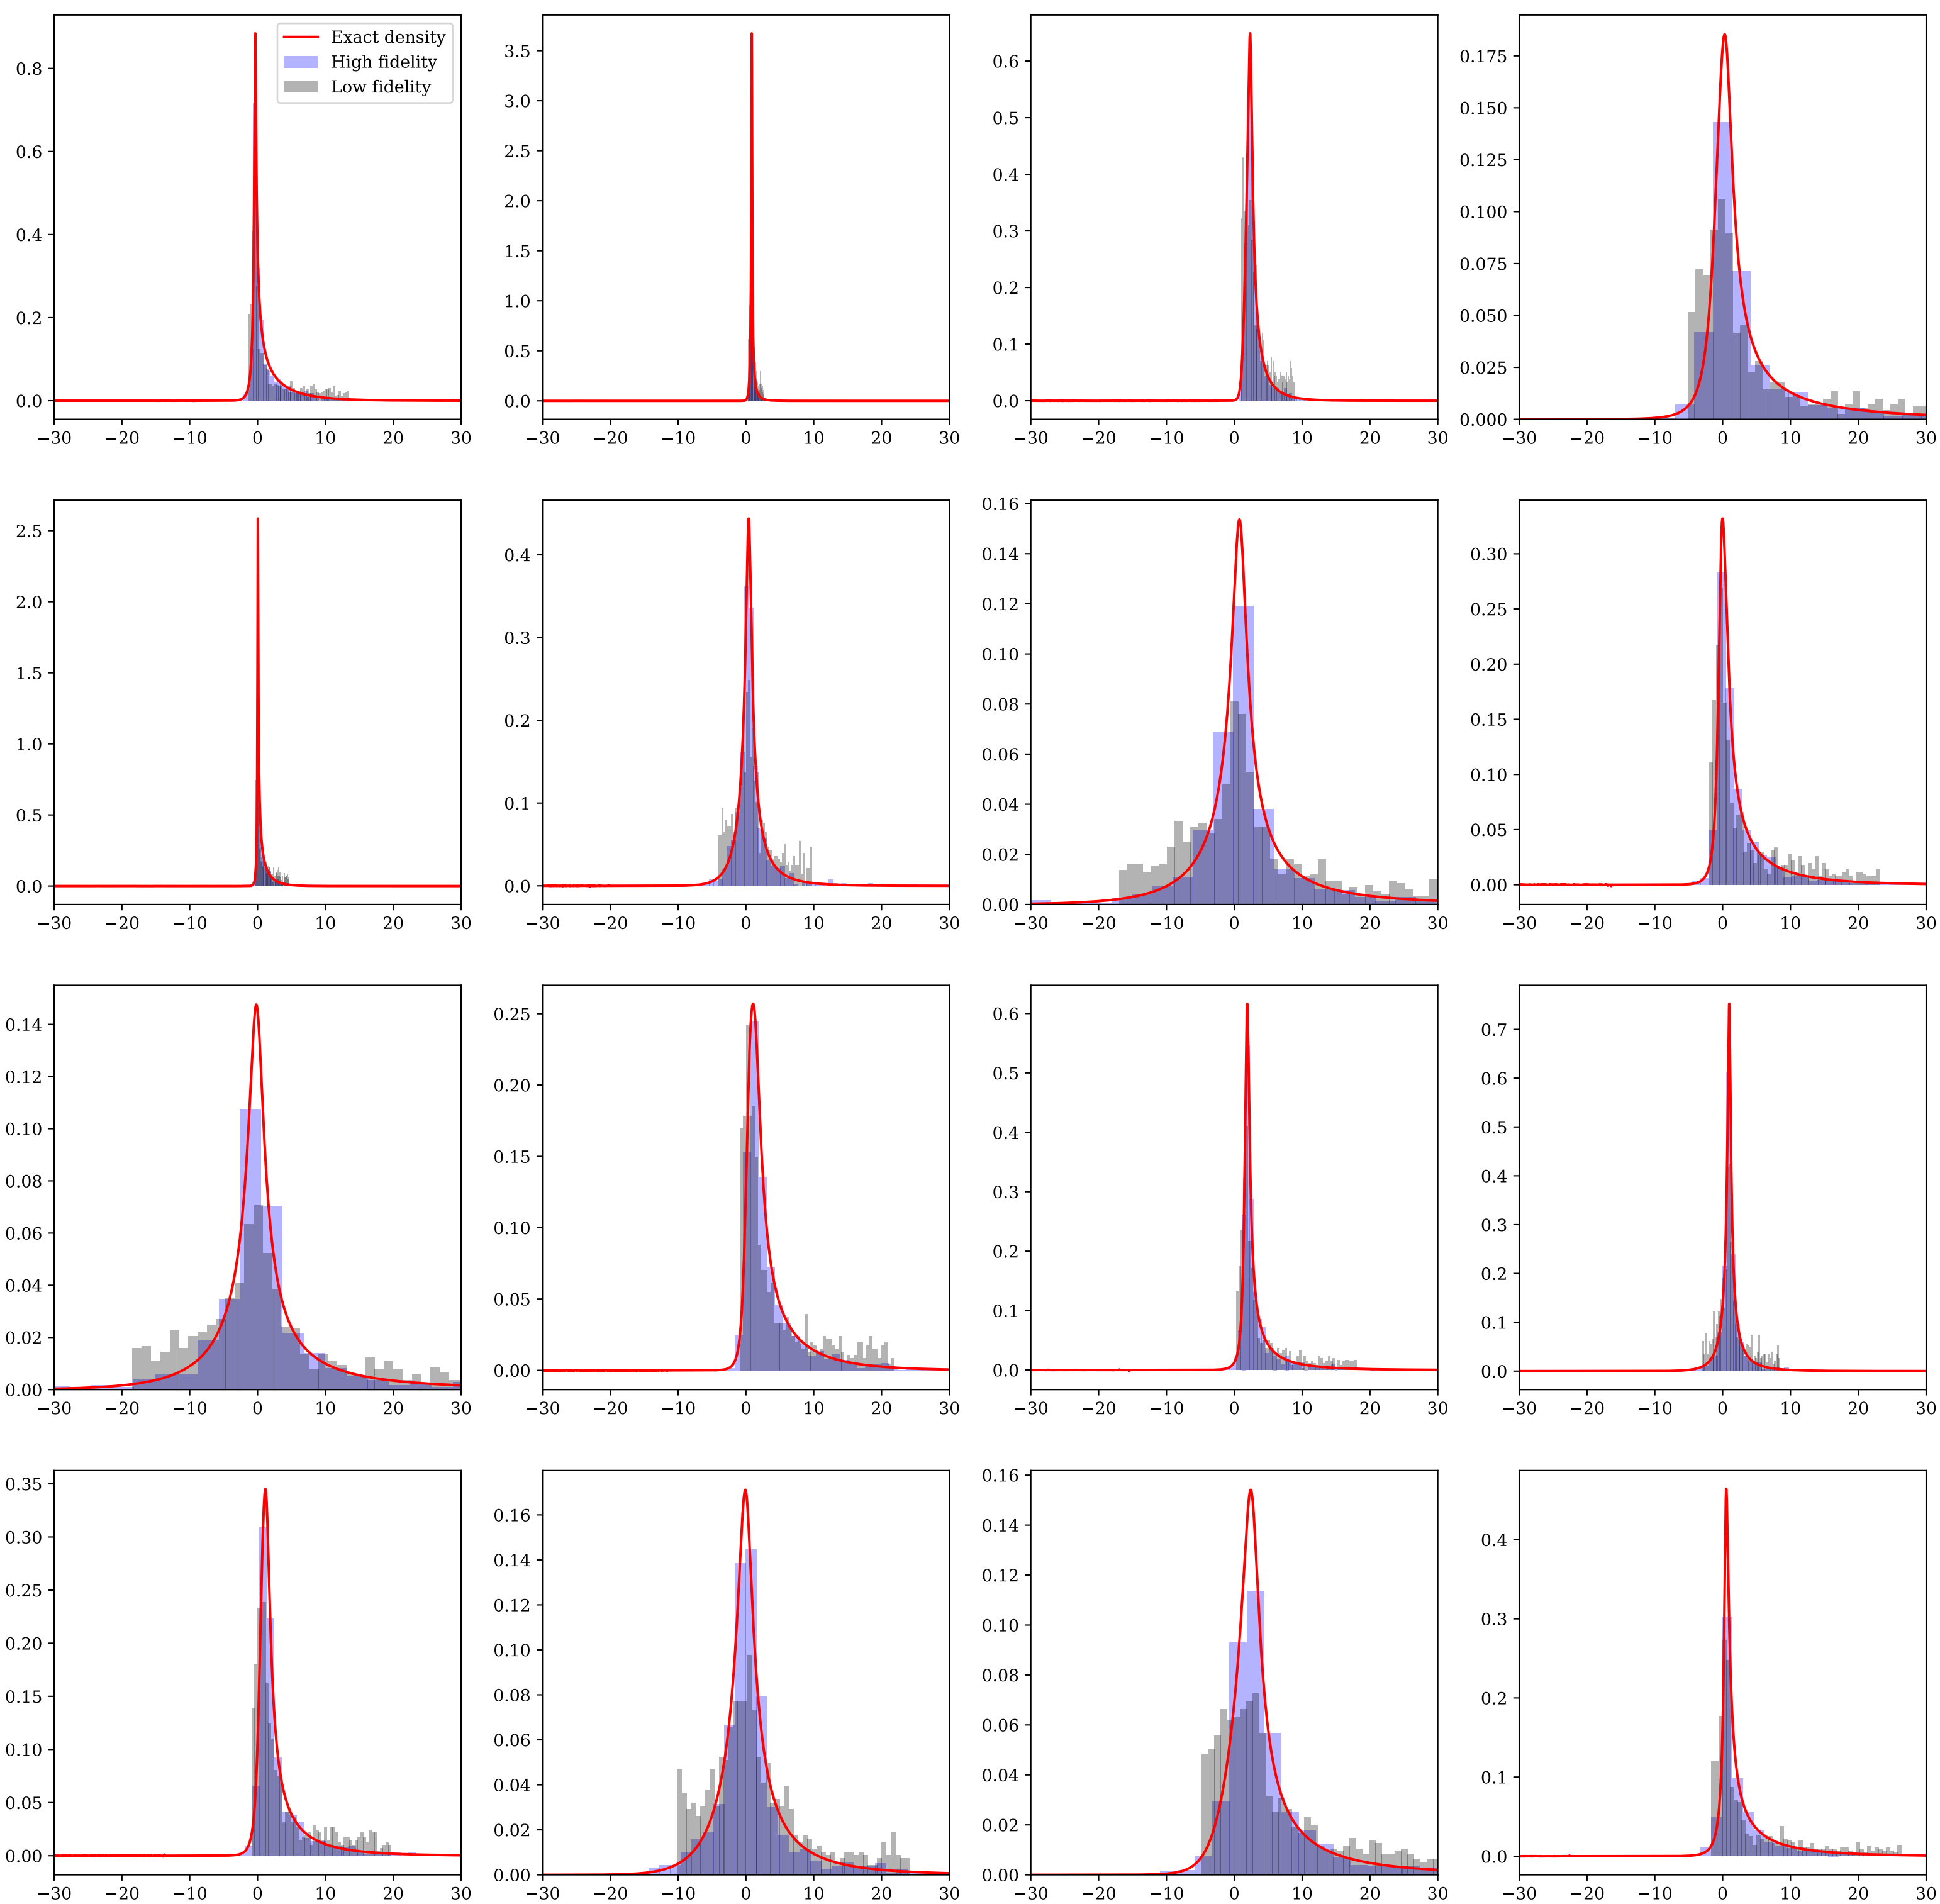

Supplement: supplementary_material [file gnk_low_high_samples.pdf › multilevel-sbi-main/figure/gnk_low_high_samples.pdf]

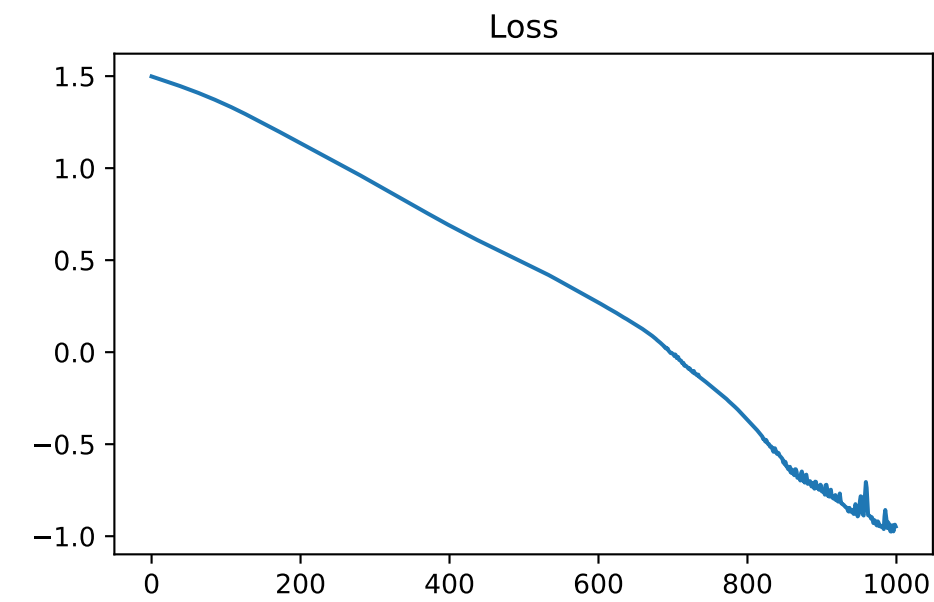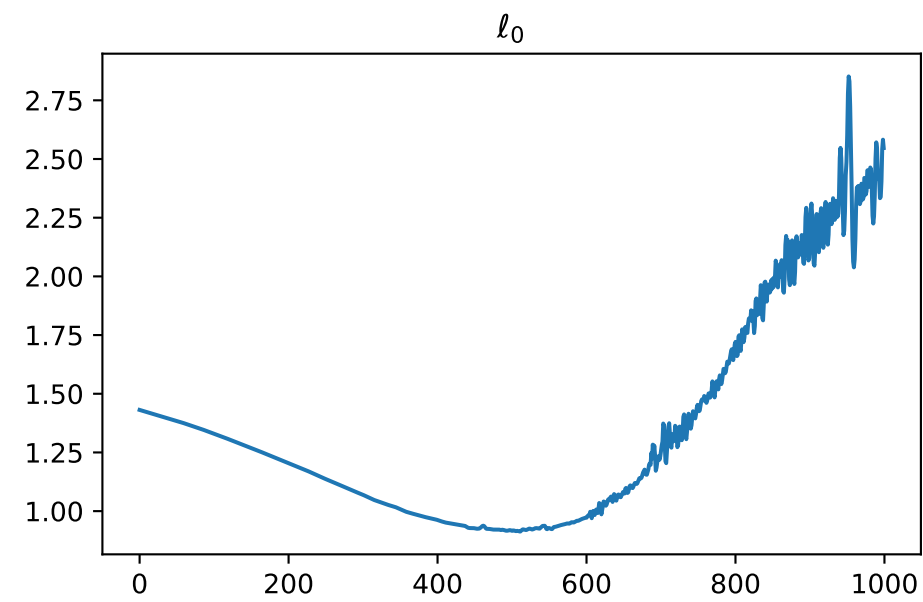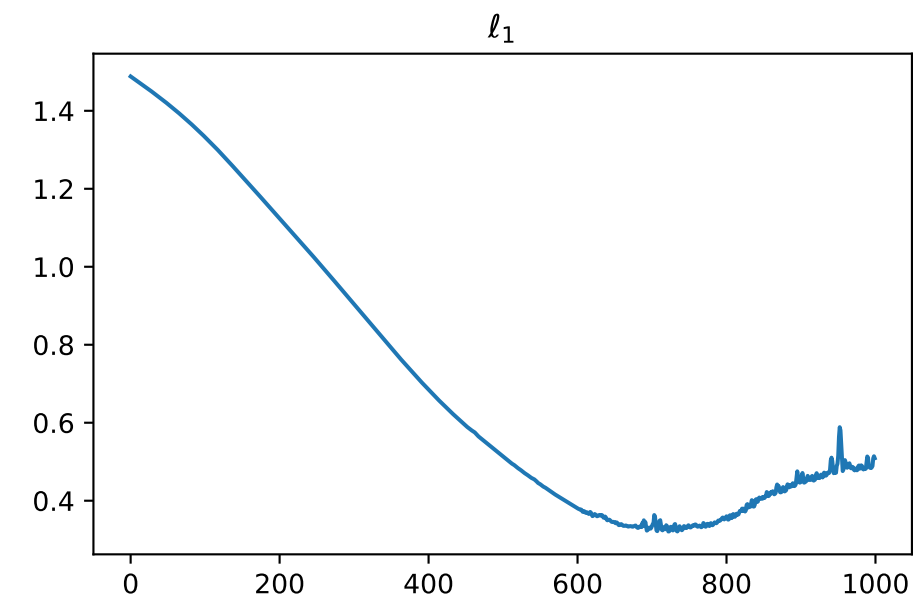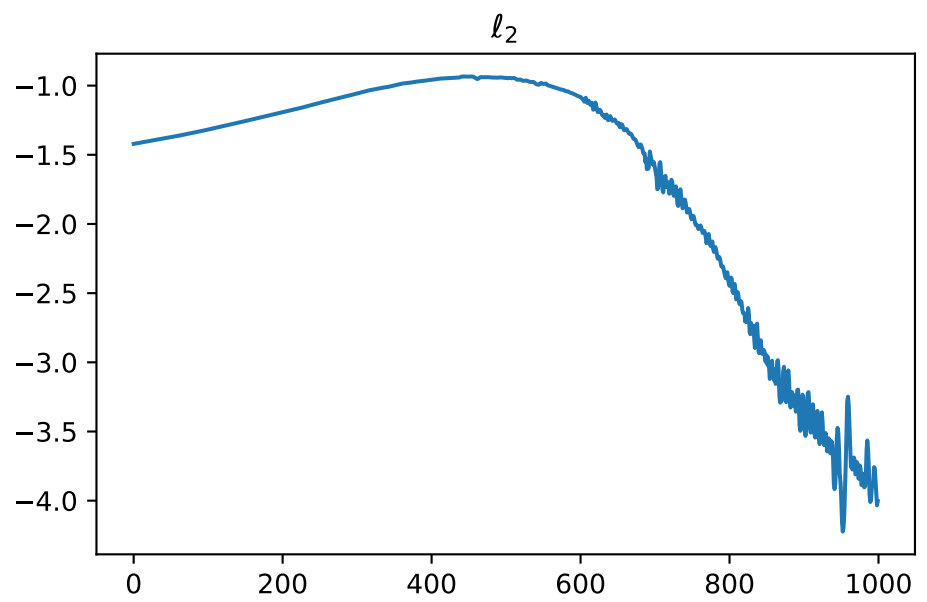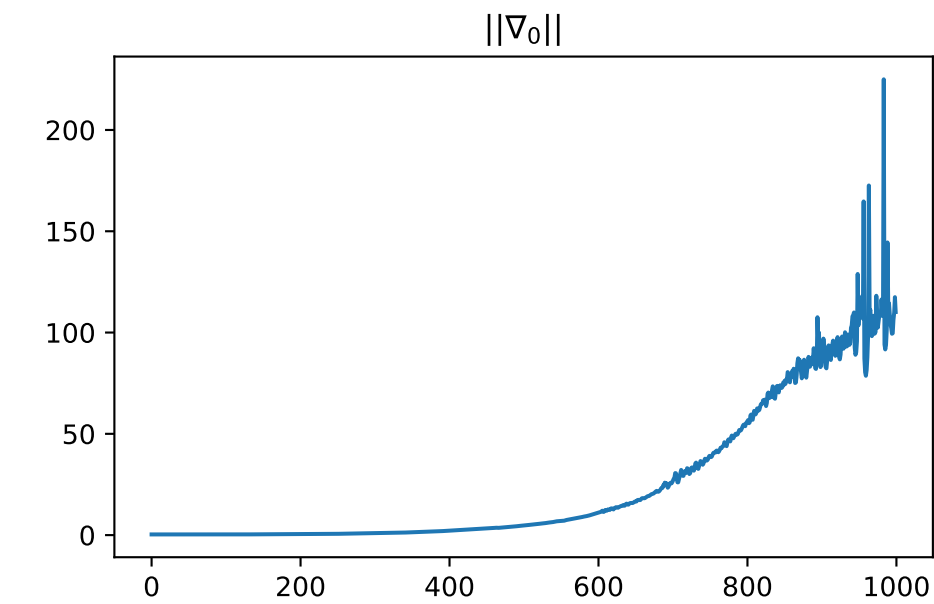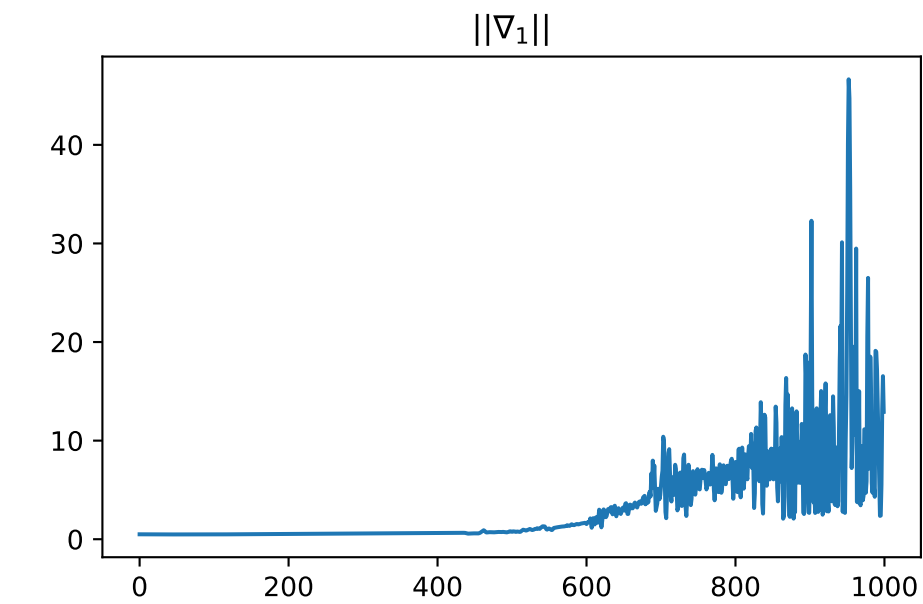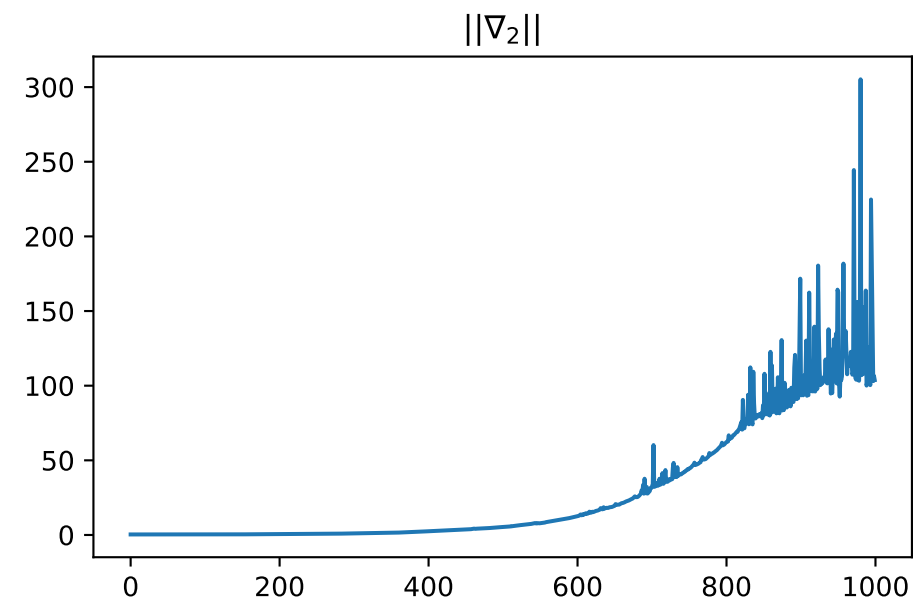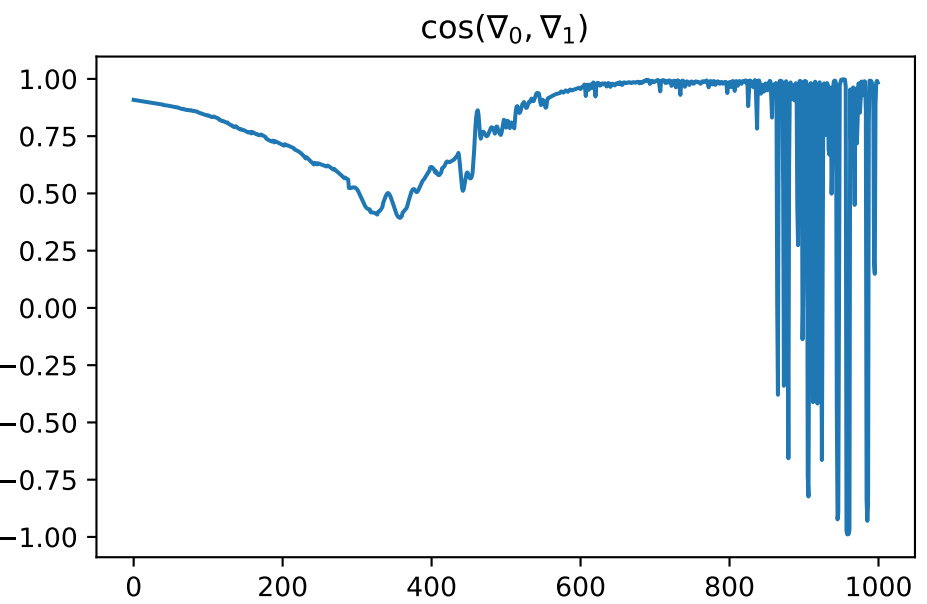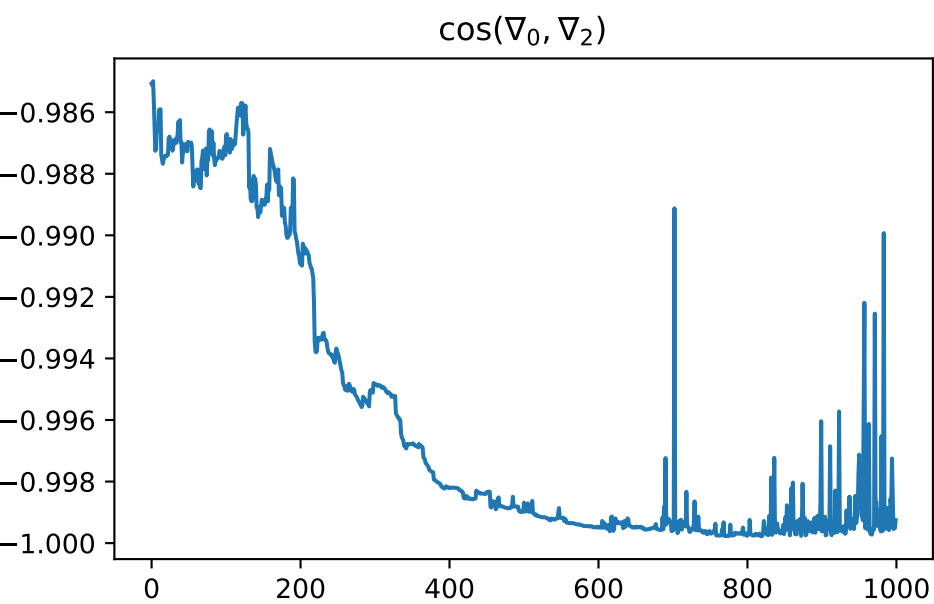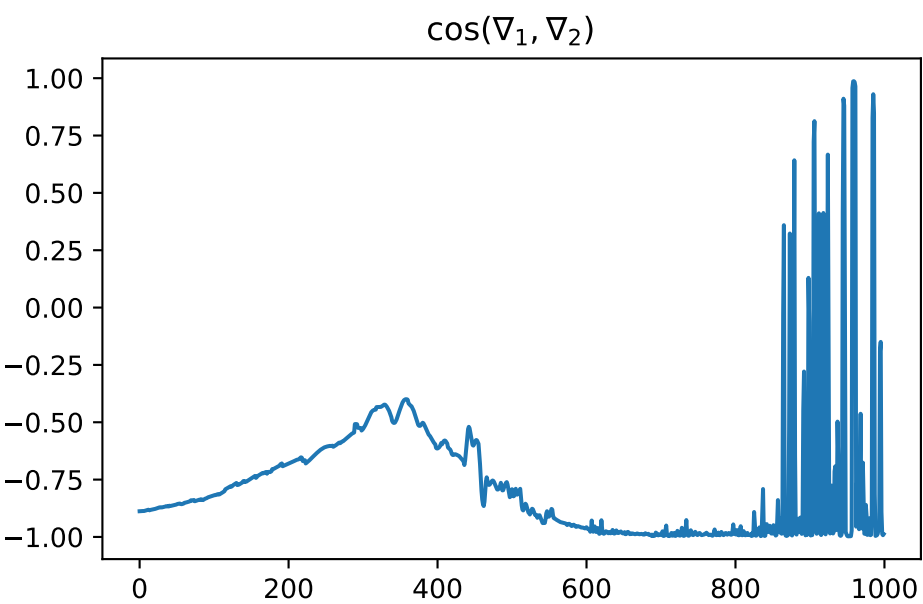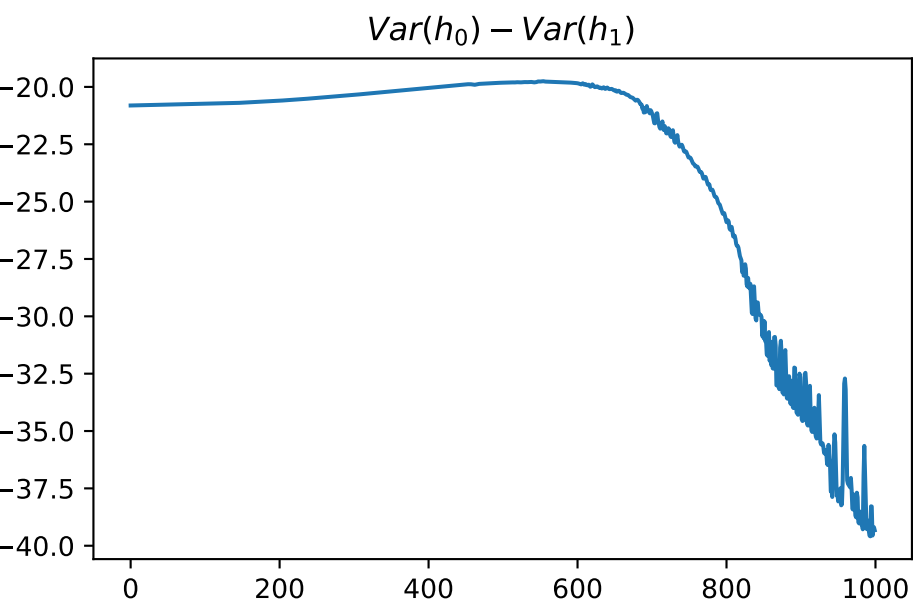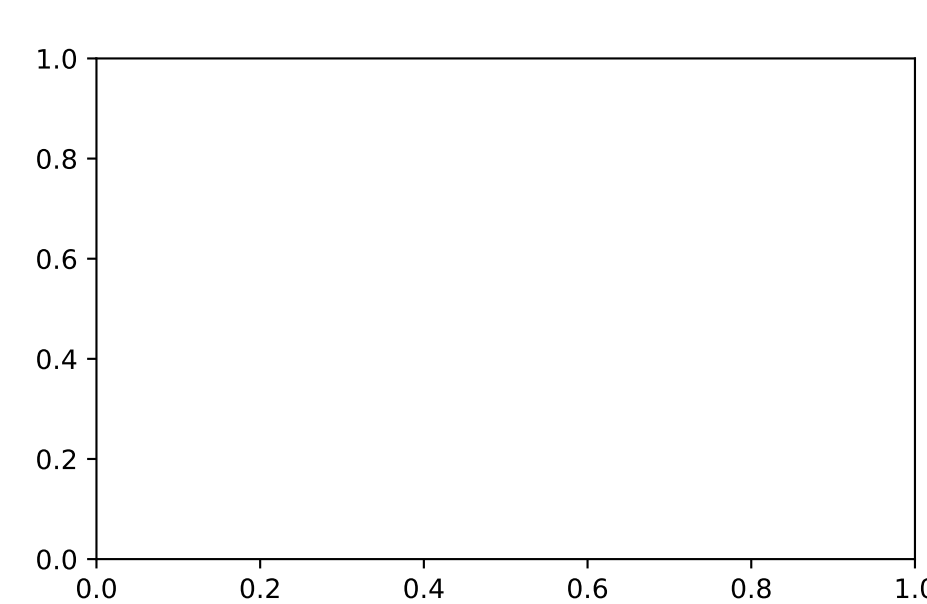

Supplement: supplementary_material [file gnk_nle_mlmc_n_1000_500_gradient_inspect_loss.pdf › multilevel-sbi-main/figure/gnk_nle_mlmc_n_1000_500_gradient_inspect_loss.pdf]

NPE (high)

Estimated

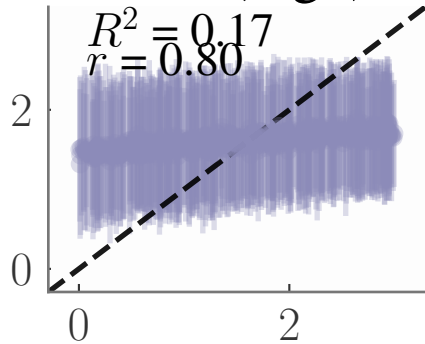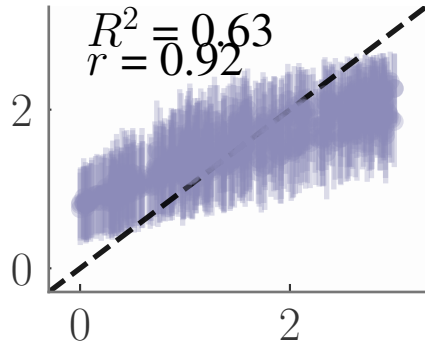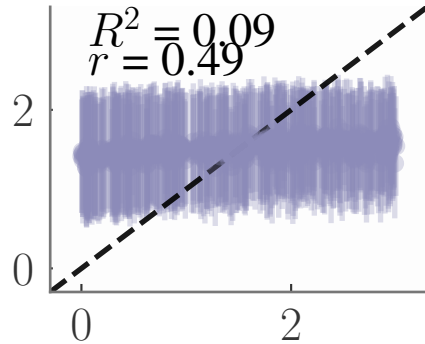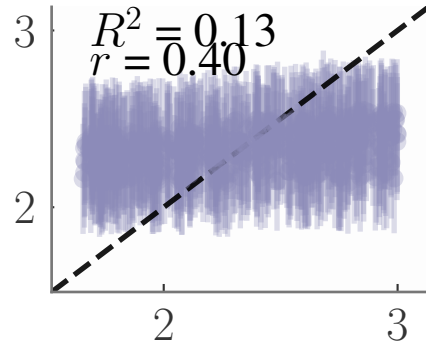

Supplement: supplementary_material [file gnk_plot_recovery_mc_high.pdf › multilevel-sbi-main/figure/gnk_plot_recovery_mc_high.pdf]

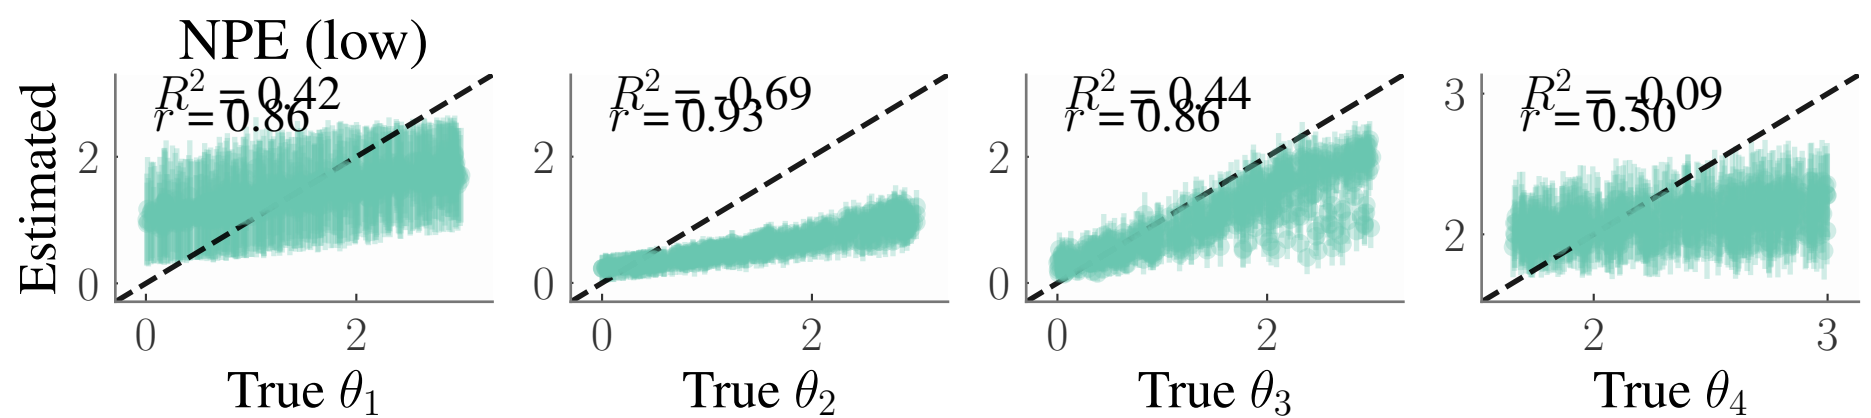

Supplement: supplementary_material [file gnk_plot_recovery_mc_low.pdf › multilevel-sbi-main/figure/gnk_plot_recovery_mc_low.pdf]

# ML-NPE (10)

Estimated

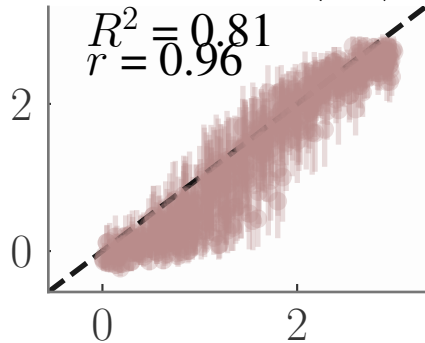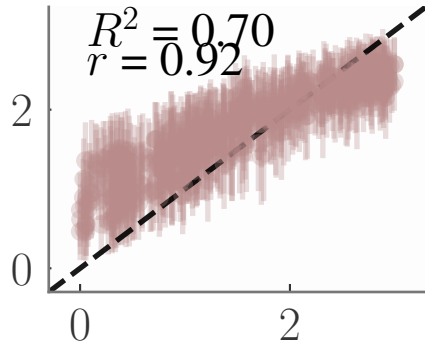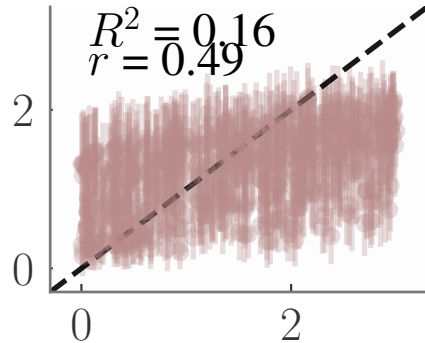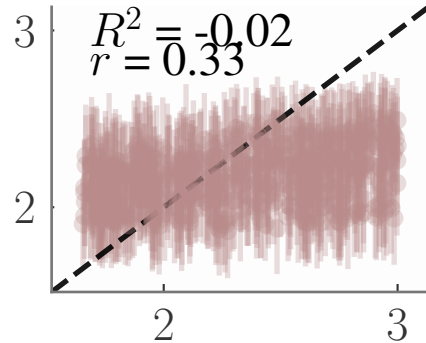

Supplement: supplementary_material [file gnk_plot_recovery_mlmc_10.pdf › multilevel-sbi-main/figure/gnk_plot_recovery_mlmc_10.pdf]

ML-NPE (100)

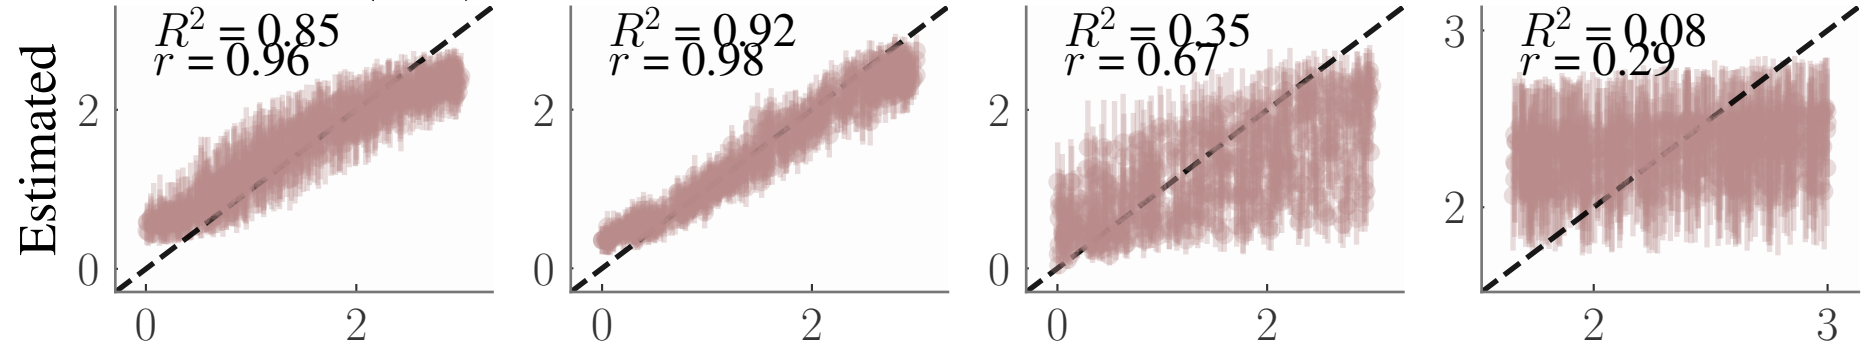

Supplement: supplementary_material [file gnk_plot_recovery_mlmc_100.pdf › multilevel-sbi-main/figure/gnk_plot_recovery_mlmc_100.pdf]

# ML-NPE (50)

Estimated

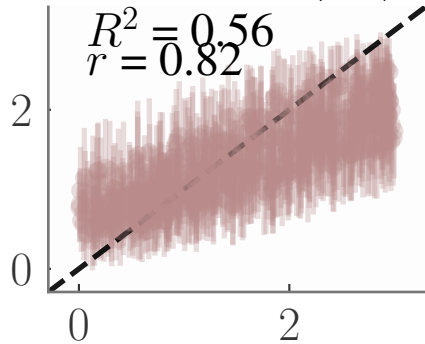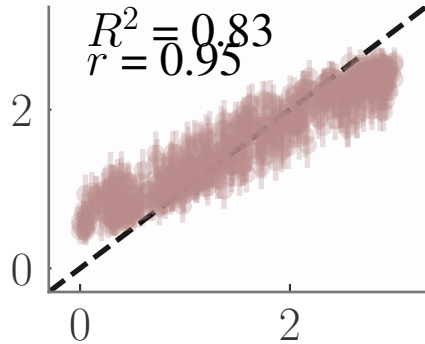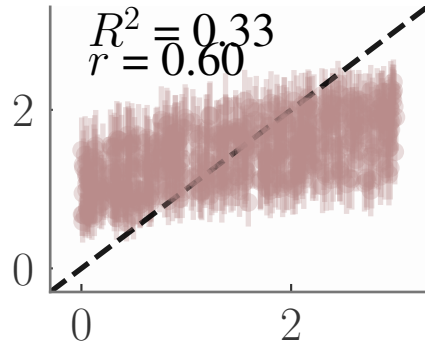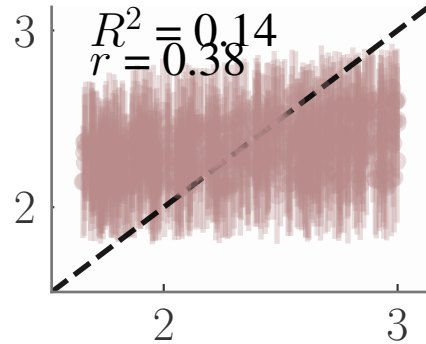

Supplement: supplementary_material [file gnk_plot_recovery_mlmc_50.pdf › multilevel-sbi-main/figure/gnk_plot_recovery_mlmc_50.pdf]

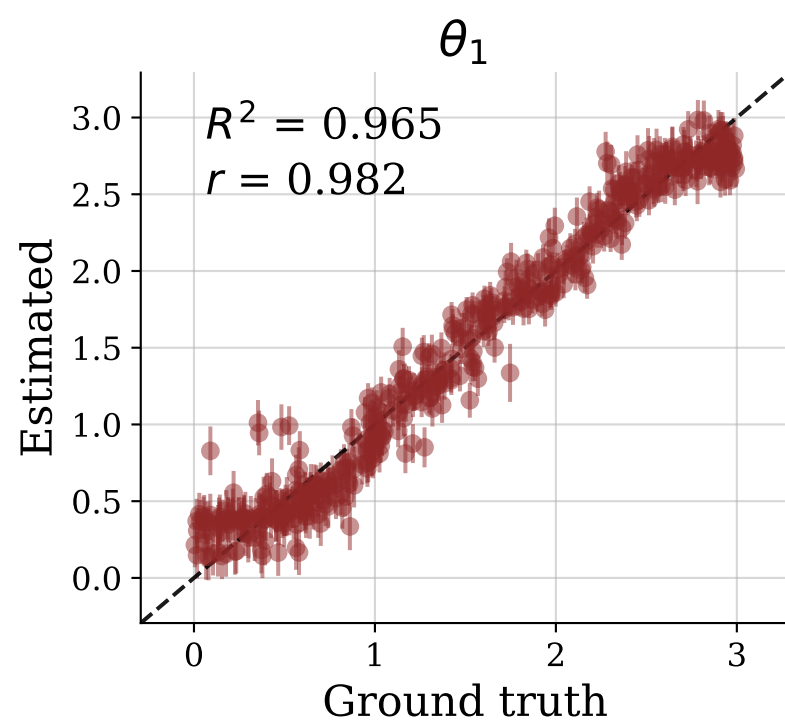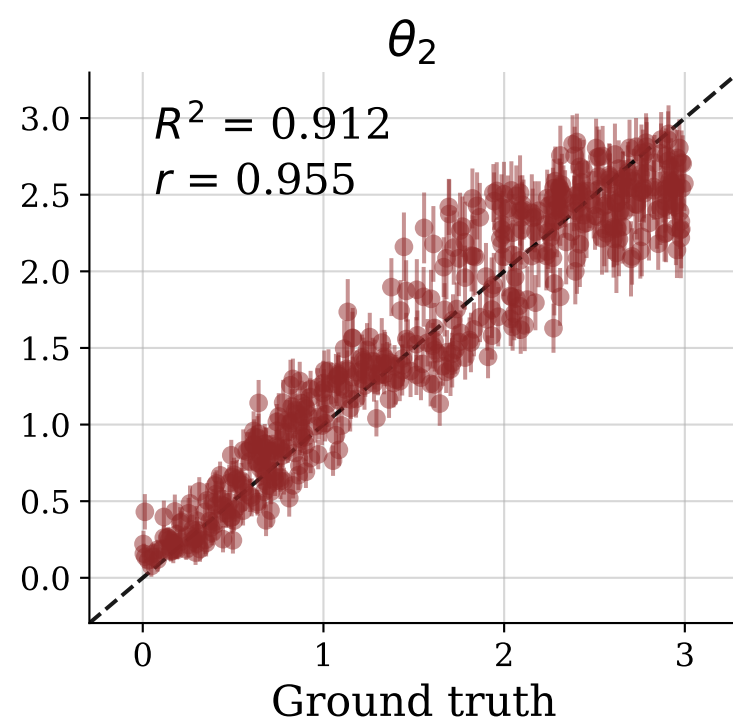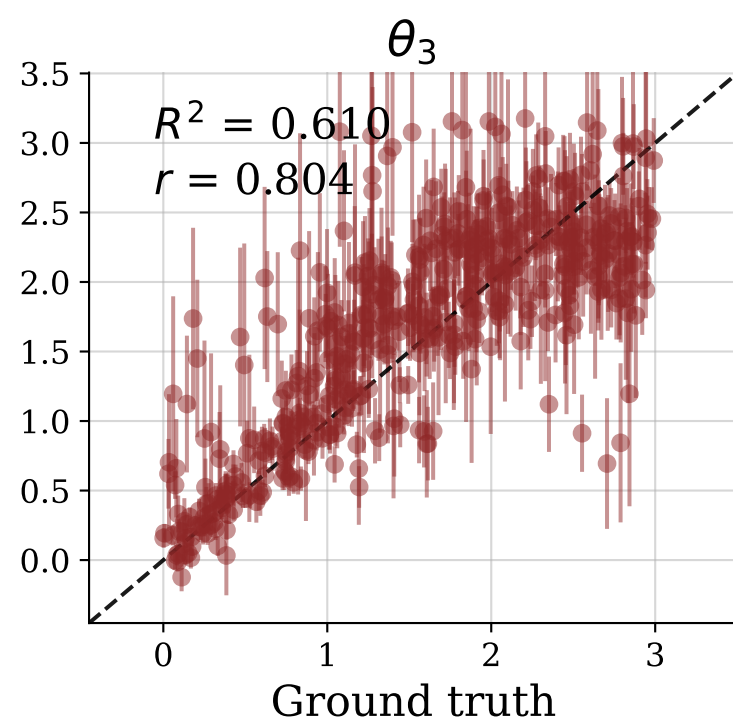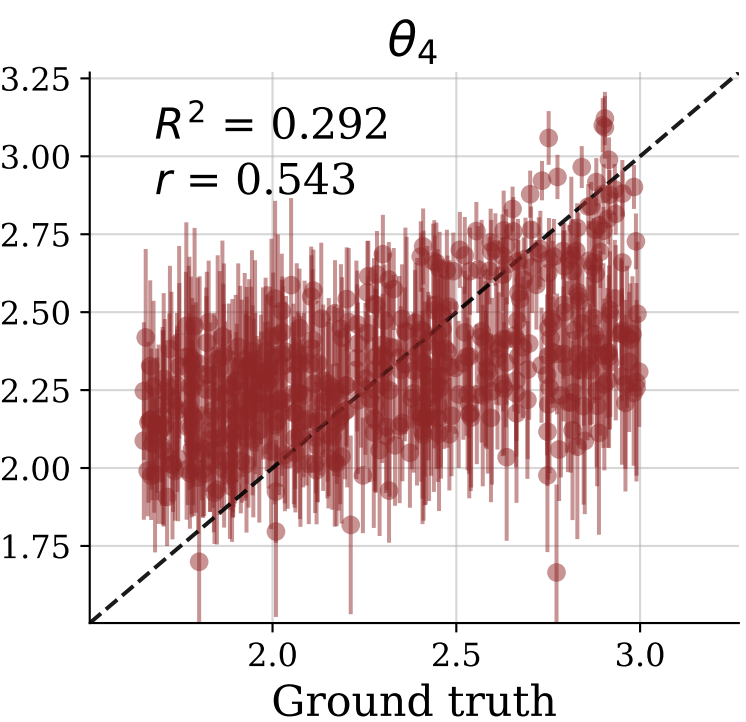

Supplement: supplementary_material [file gnk_post_mc_high.pdf › multilevel-sbi-main/figure/gnk_post_mc_high.pdf]

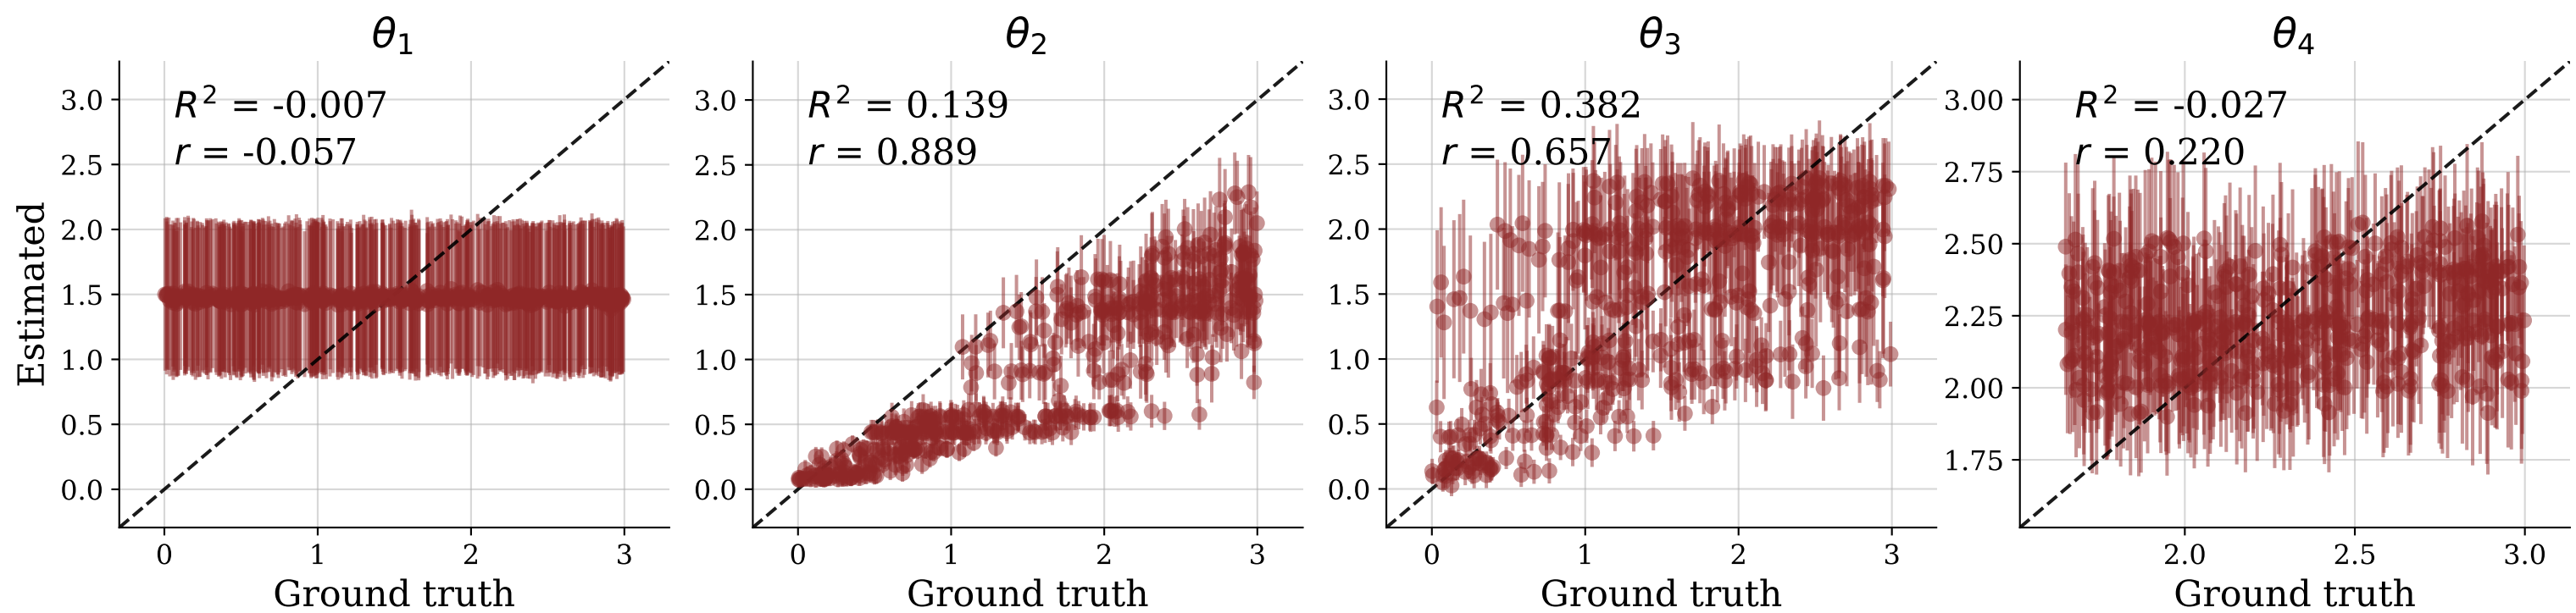

Supplement: supplementary_material [file gnk_post_mc_low.pdf › multilevel-sbi-main/figure/gnk_post_mc_low.pdf]

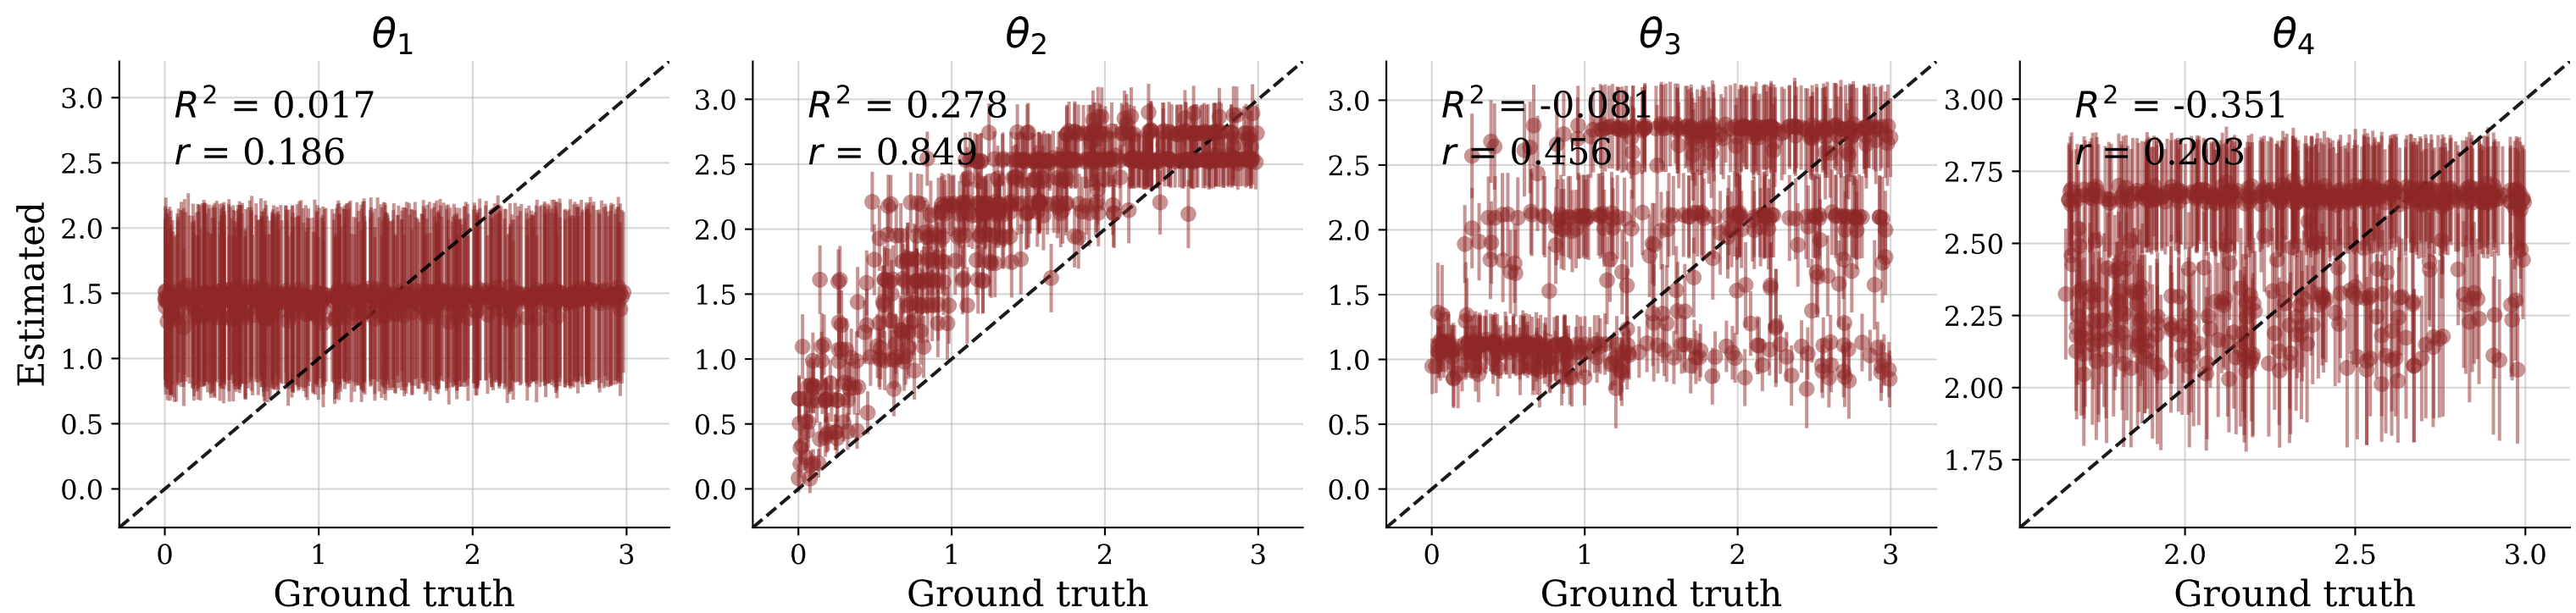

Supplement: supplementary_material [file gnk_post_mlmc_100_1.pdf › multilevel-sbi-main/figure/gnk_post_mlmc_100_1.pdf]

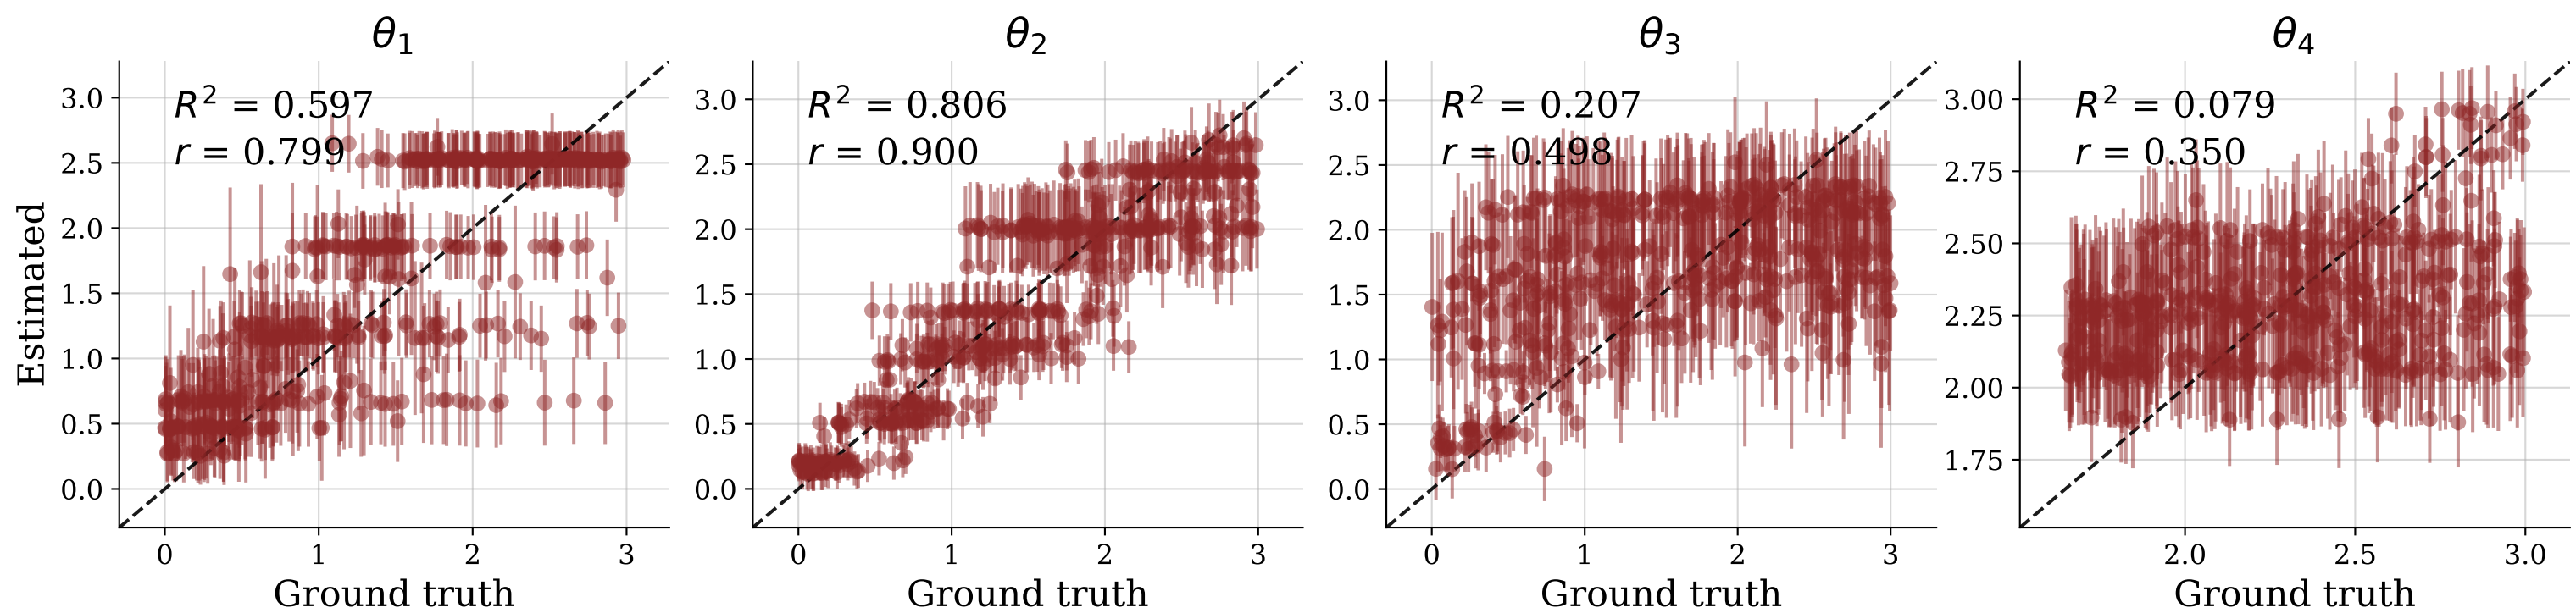

Supplement: supplementary_material [file gnk_post_mlmc_10_1.pdf › multilevel-sbi-main/figure/gnk_post_mlmc_10_1.pdf]

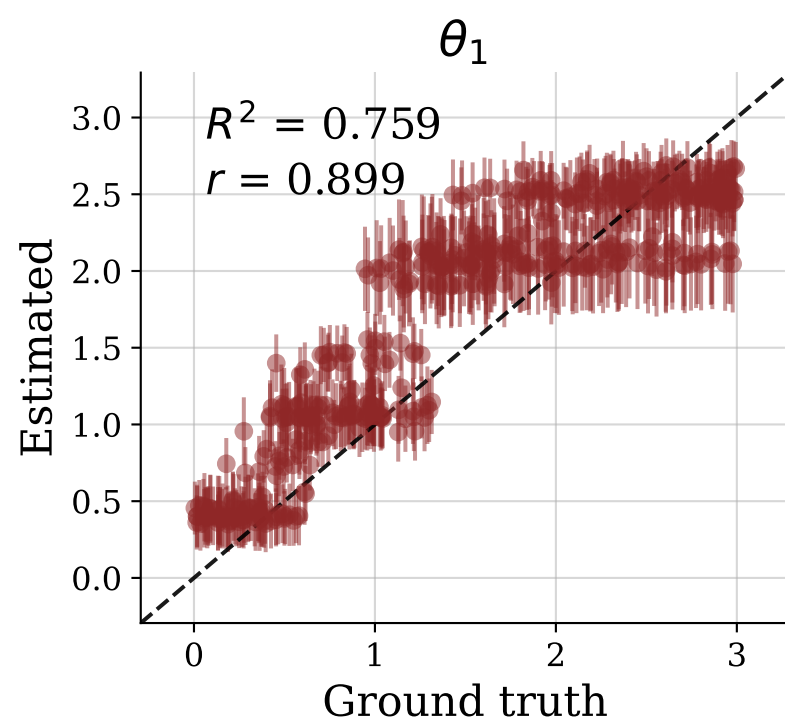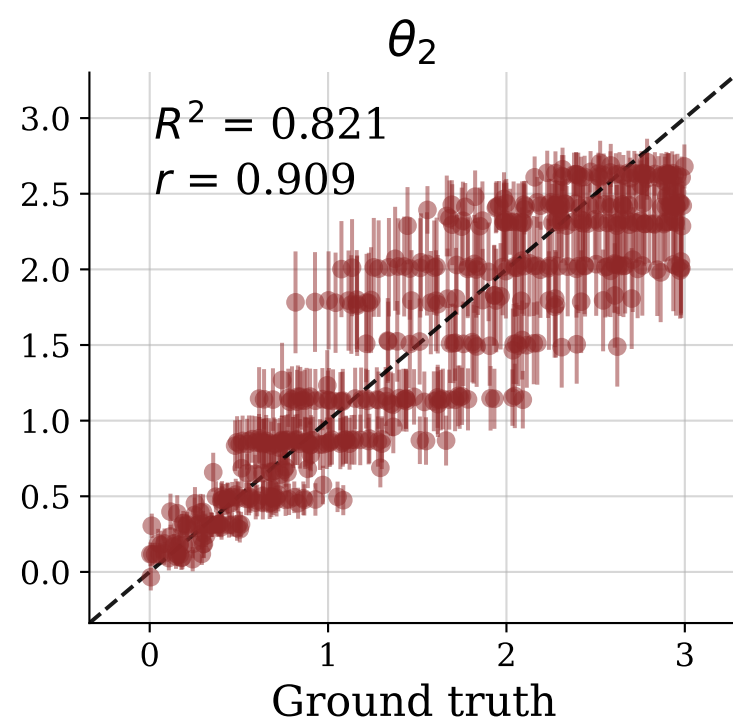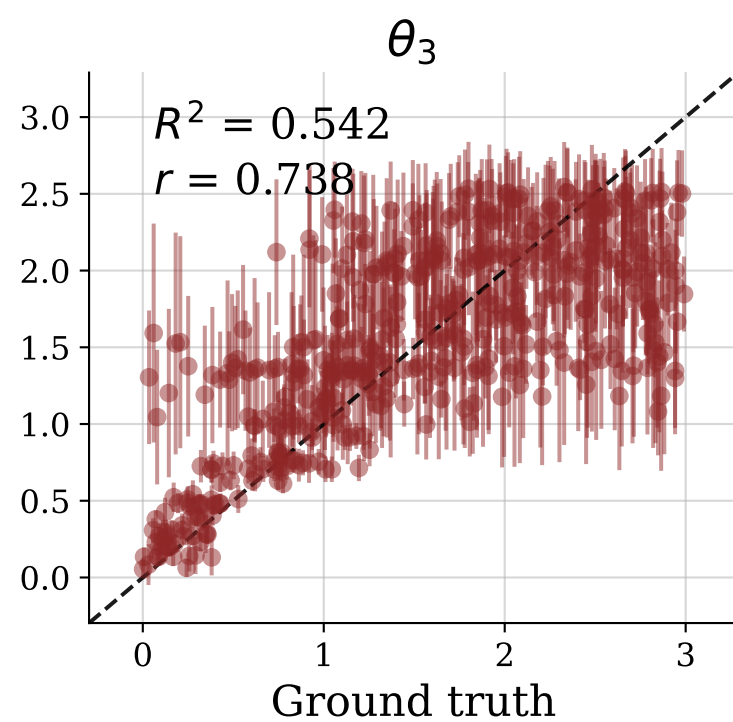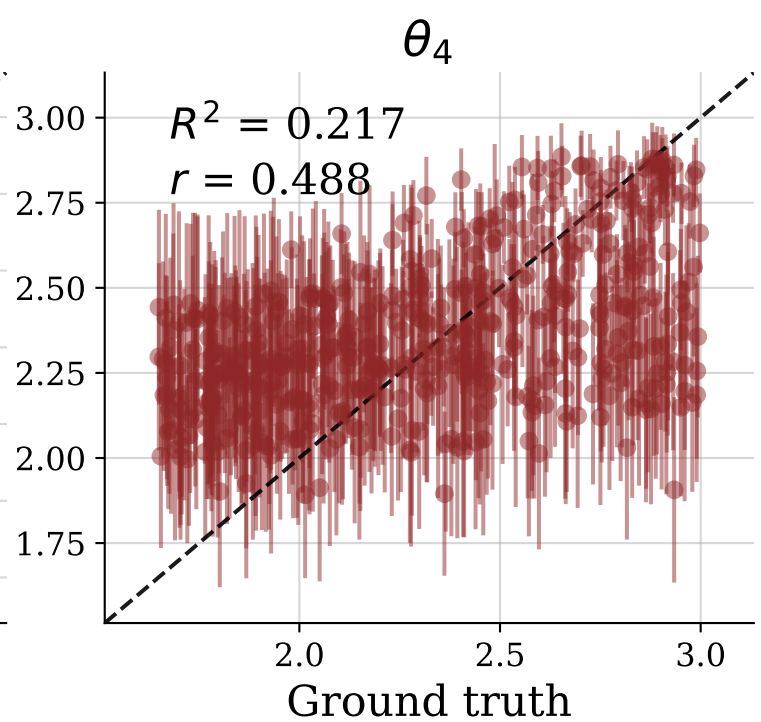

Supplement: supplementary_material [file gnk_post_mlmc_2_1.pdf › multilevel-sbi-main/figure/gnk_post_mlmc_2_1.pdf]

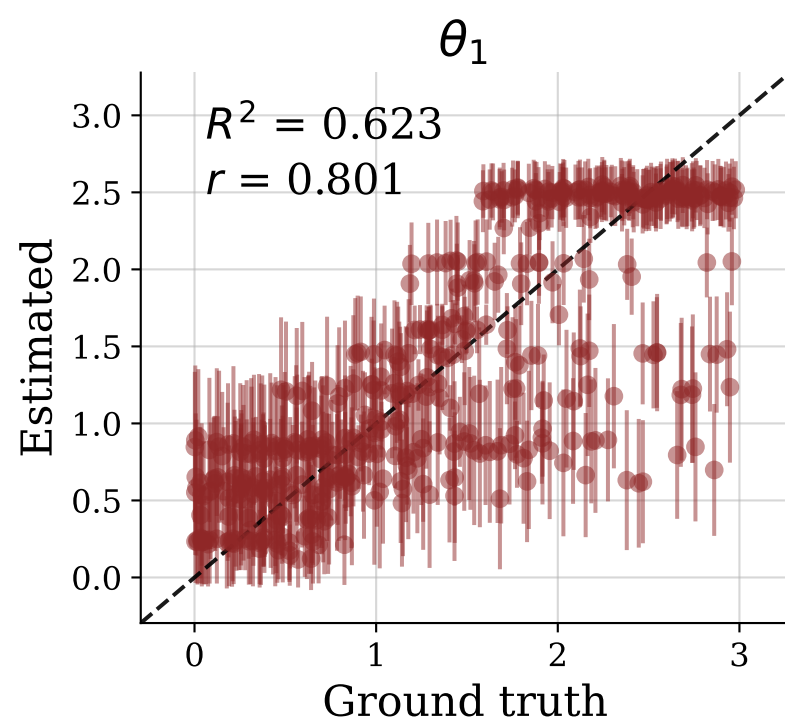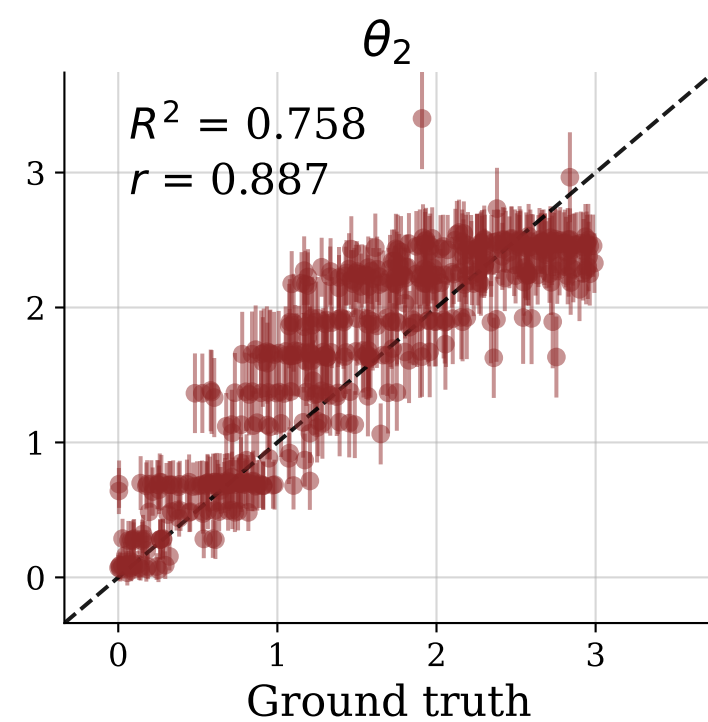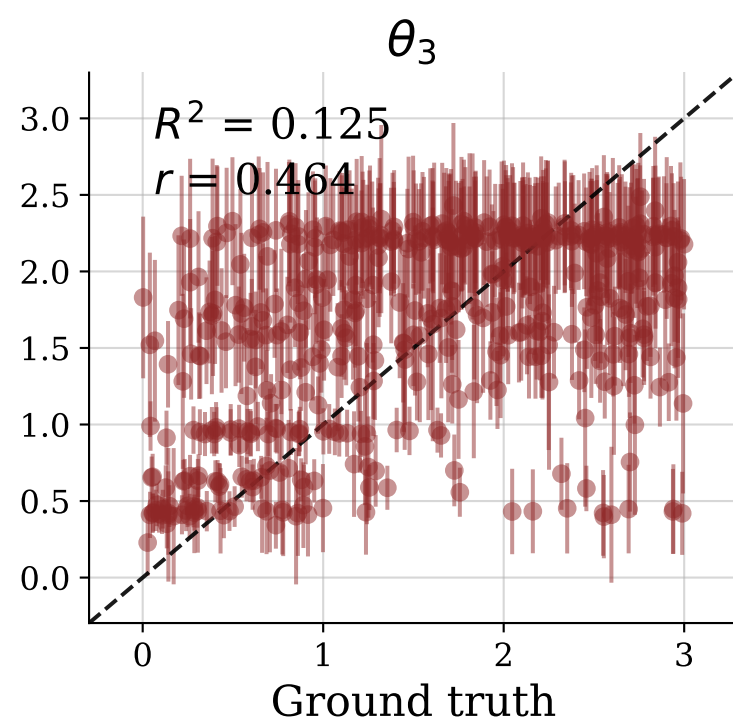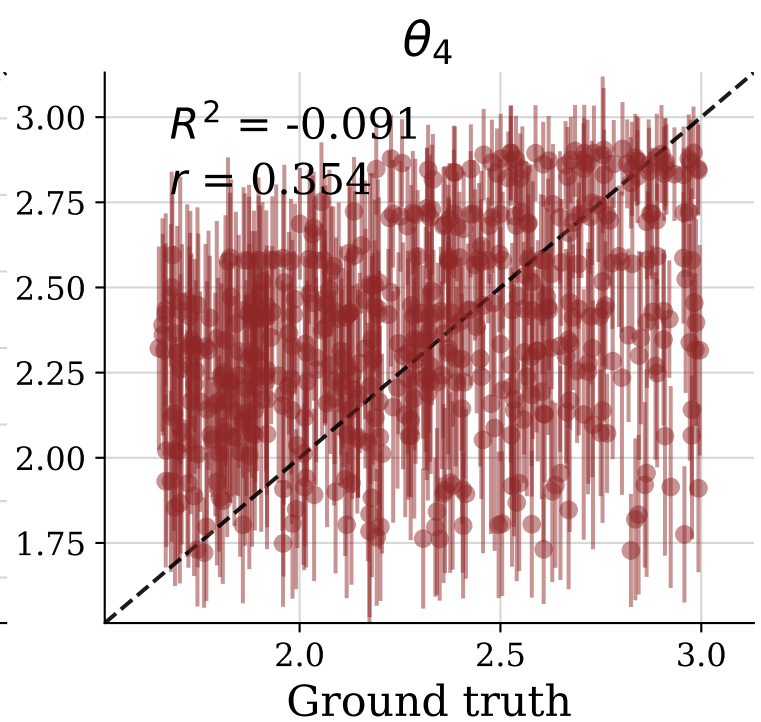

Supplement: supplementary_material [file gnk_post_mlmc_50_1.pdf › multilevel-sbi-main/figure/gnk_post_mlmc_50_1.pdf]

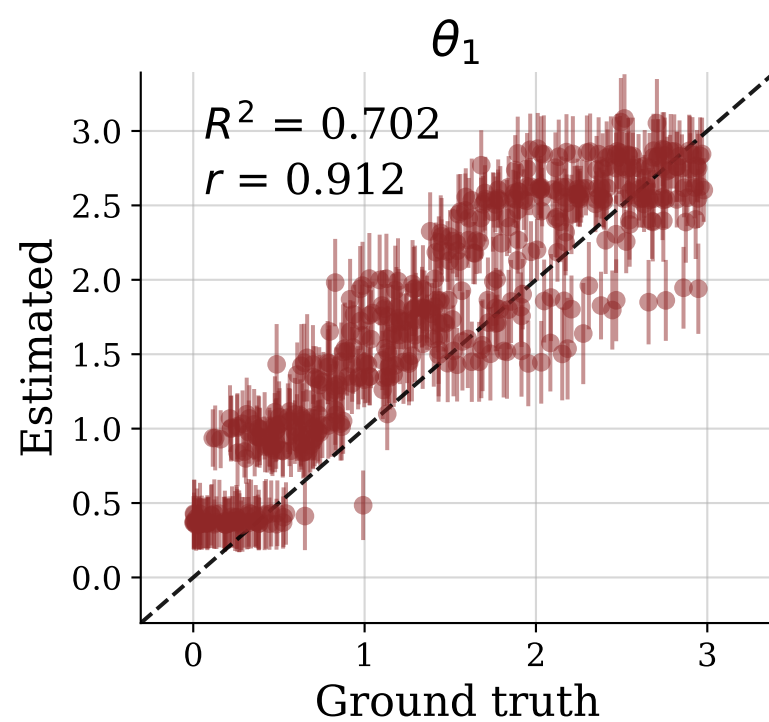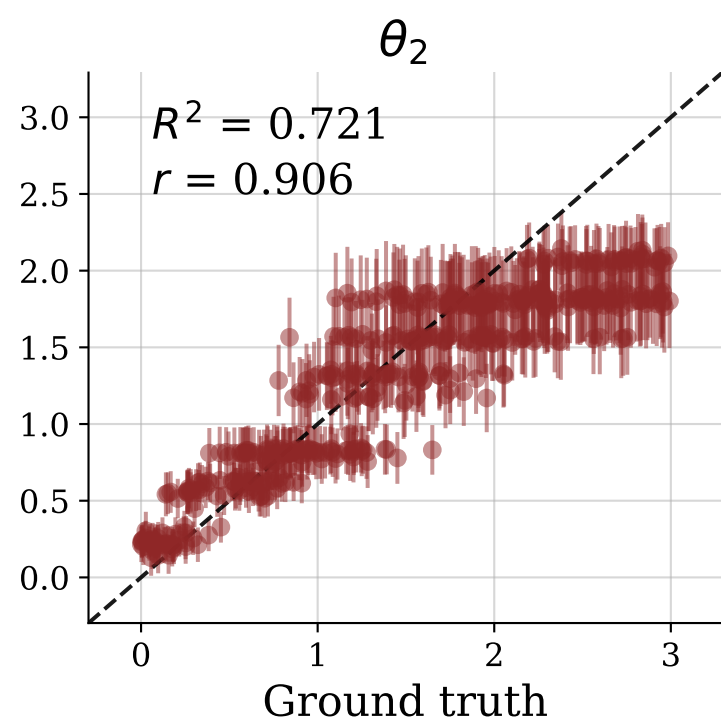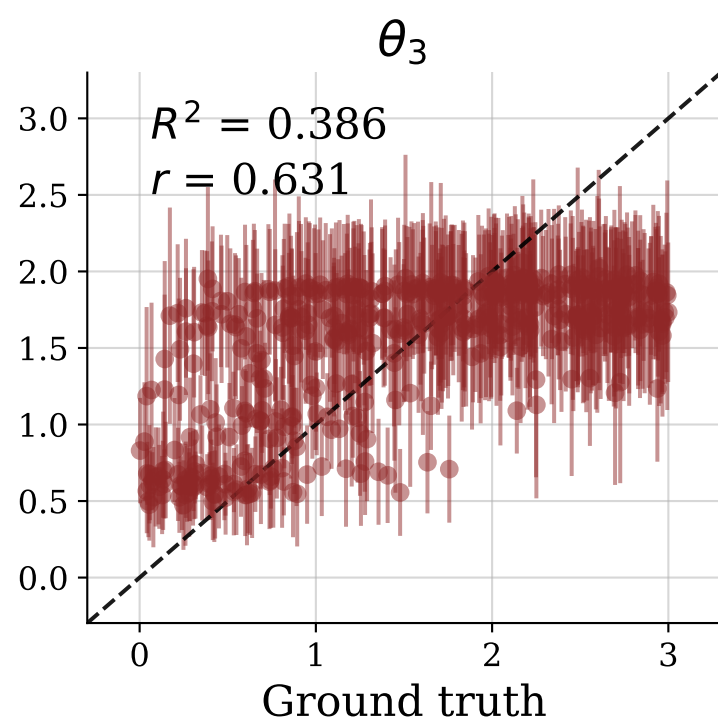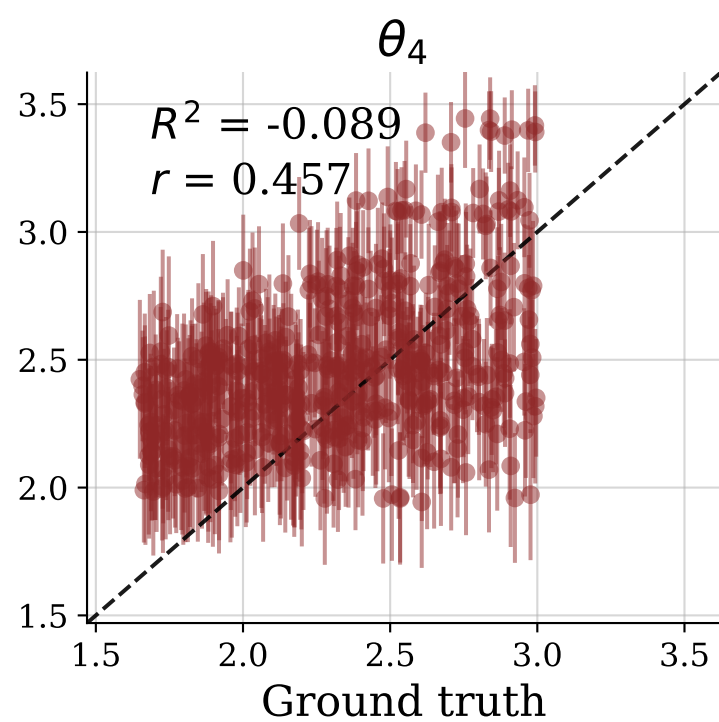

Supplement: supplementary_material [file gnk_post_mlmc_5_1.pdf › multilevel-sbi-main/figure/gnk_post_mlmc_5_1.pdf]

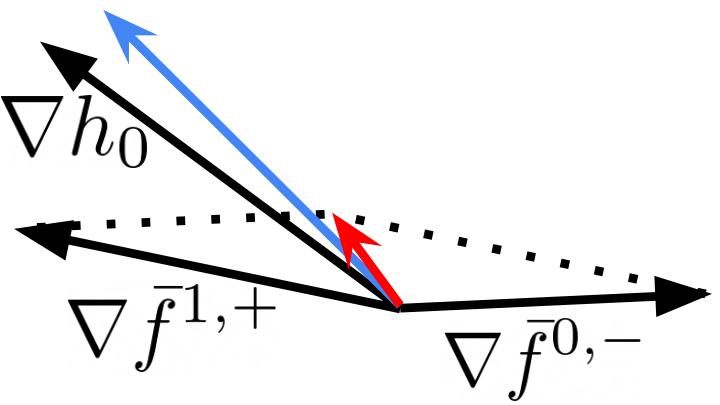

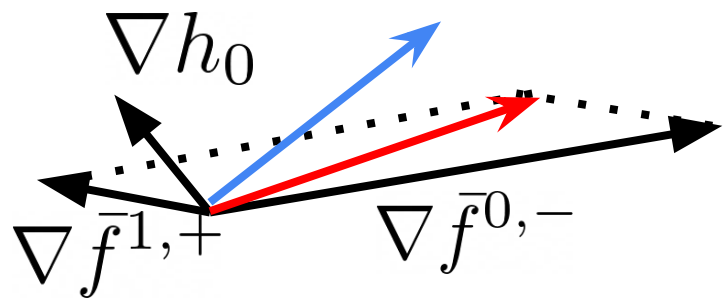

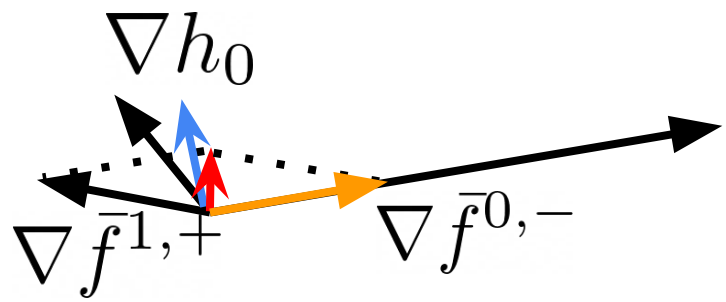

Supplement: supplementary_material [file gradient_arrows.pdf › multilevel-sbi-main/figure/gradient_arrows.pdf]

$\ell_{MLMC}$ 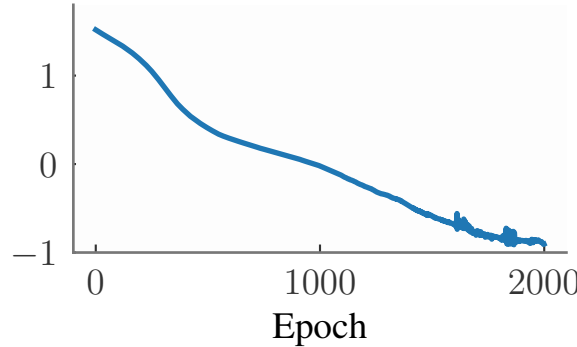 $h_0$ 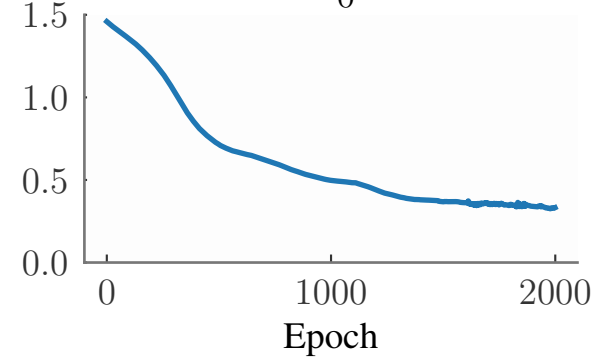 $\bar{f}^{1,+}$ 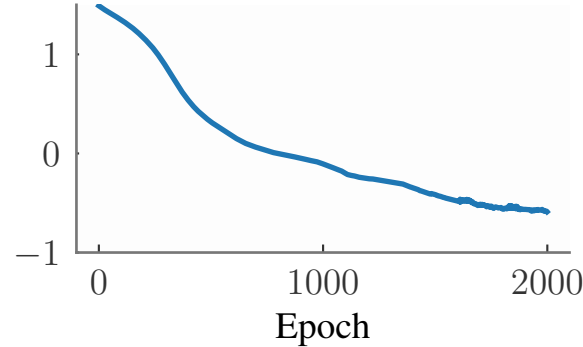 $\bar{f}^{1,-}$ 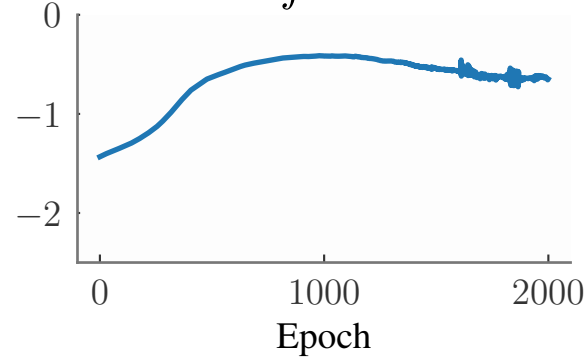

Supplement: supplementary_material [file loss_new_gnk.pdf › multilevel-sbi-main/figure/loss_new_gnk.pdf]

$\ell_{MLMC}$ 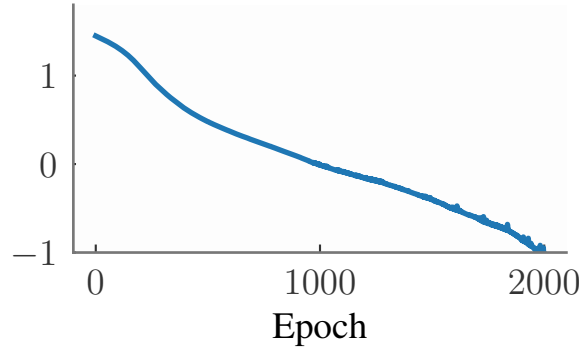 $h_0$ 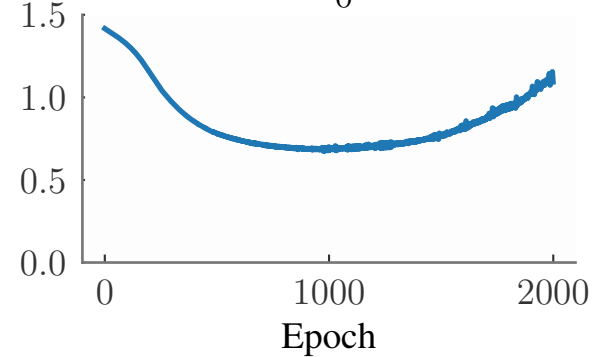 $\bar{f}^{1,+}$ 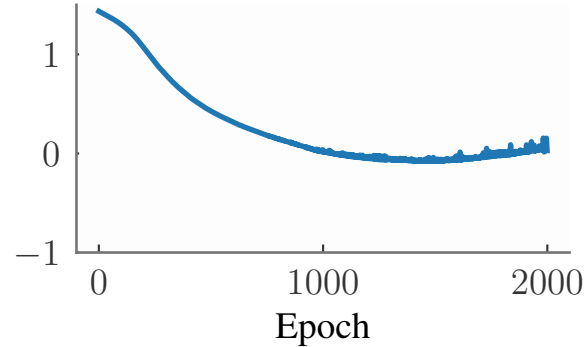 $\bar{f}^{1,-}$ 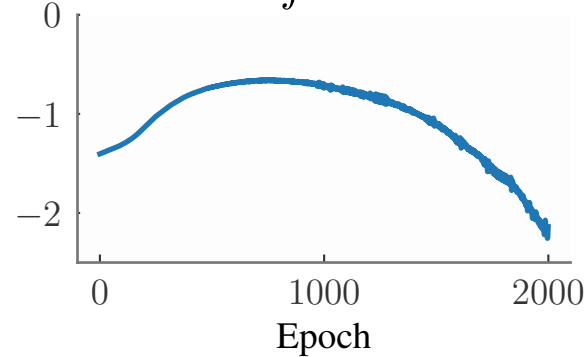

Supplement: supplementary_material [file loss_old_gnk.pdf › multilevel-sbi-main/figure/loss_old_gnk.pdf]

$$n_1 = 10$$

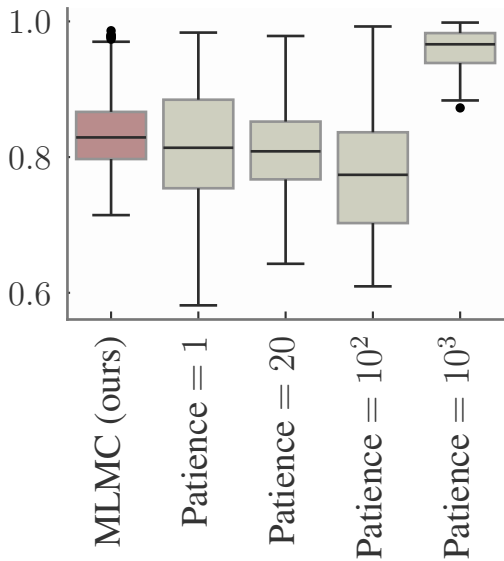

Supplement: supplementary_material [file oup_c2st.pdf › multilevel-sbi-main/figure/oup_c2st.pdf]

$$n_1 = 10$$

C2ST

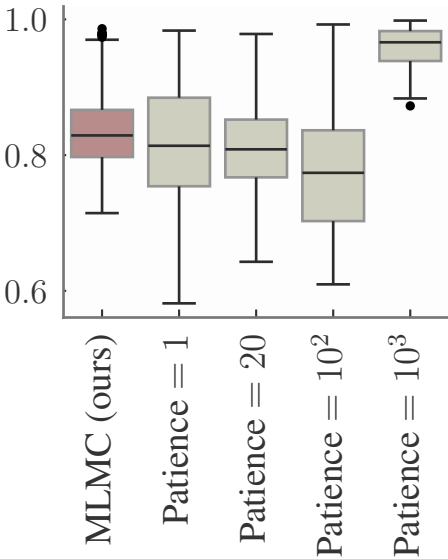

Supplement: supplementary_material [file oup_c2st_10.pdf › multilevel-sbi-main/figure/oup_c2st_10.pdf]

$$n_1 = 50$$

C2ST

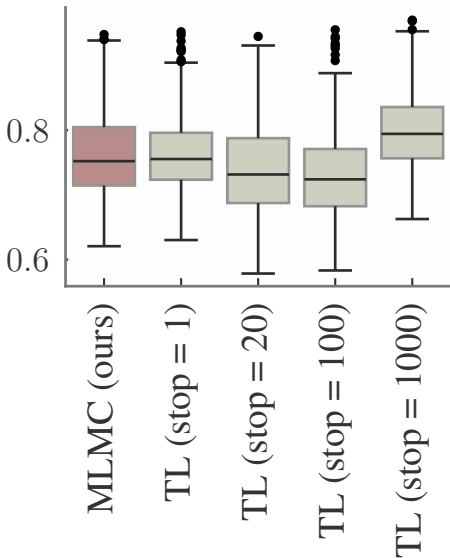

Supplement: supplementary_material [file oup_c2st_50.pdf › multilevel-sbi-main/figure/oup_c2st_50.pdf]

C2ST

1.0  
0.9  
0.8  
0.7  
0.6

MLMC

TL

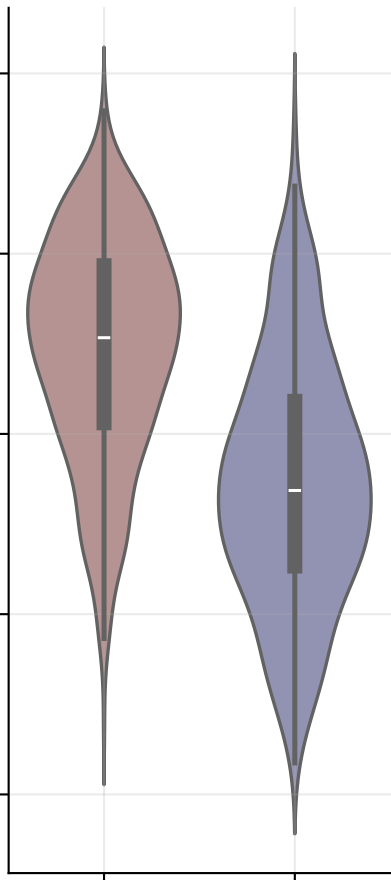

Supplement: supplementary_material [file oup_c2st_different_summary.pdf › multilevel-sbi-main/figure/oup_c2st_different_summary.pdf]

C2ST

$\gamma$

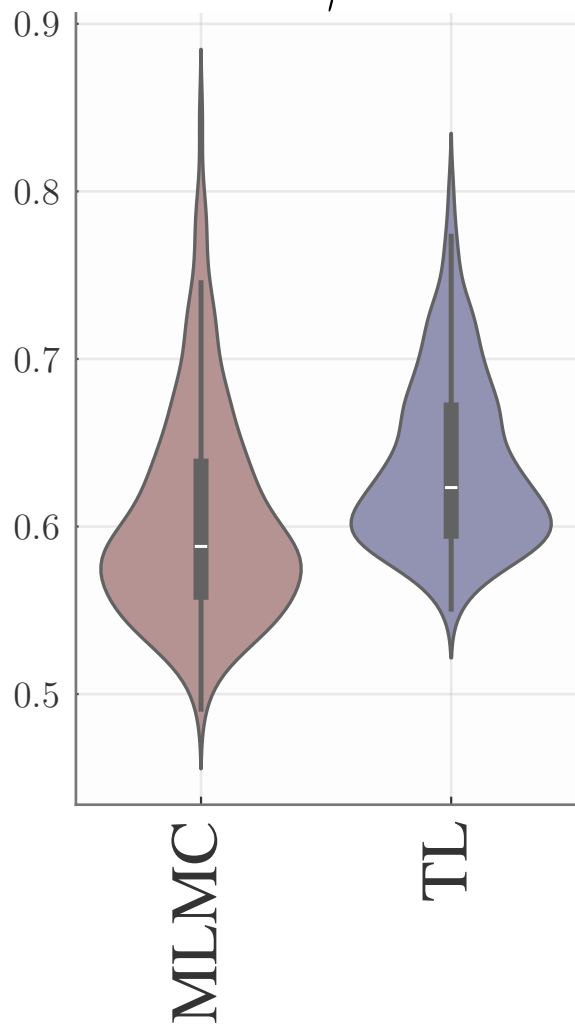

$\mu$

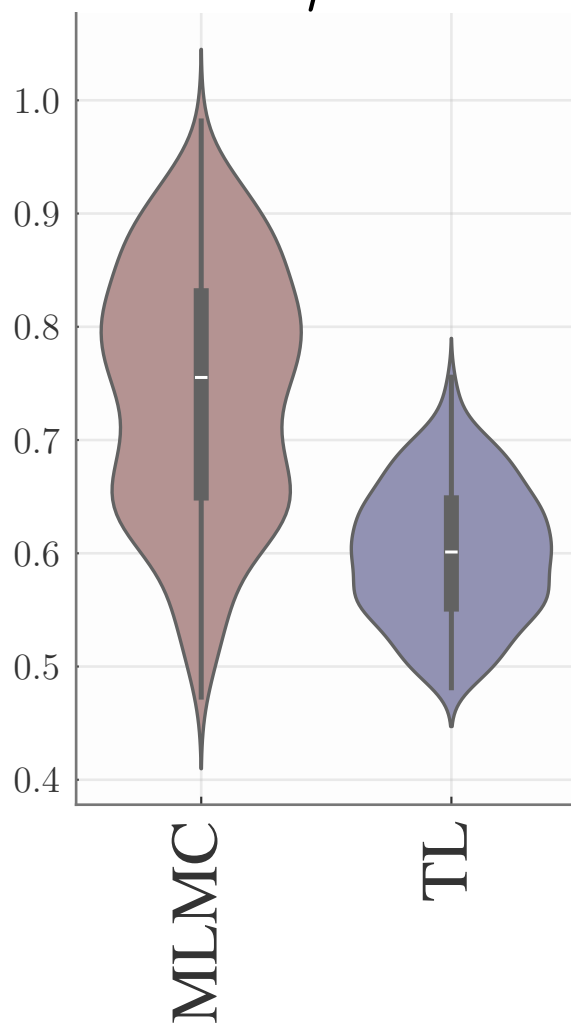

$\sigma$

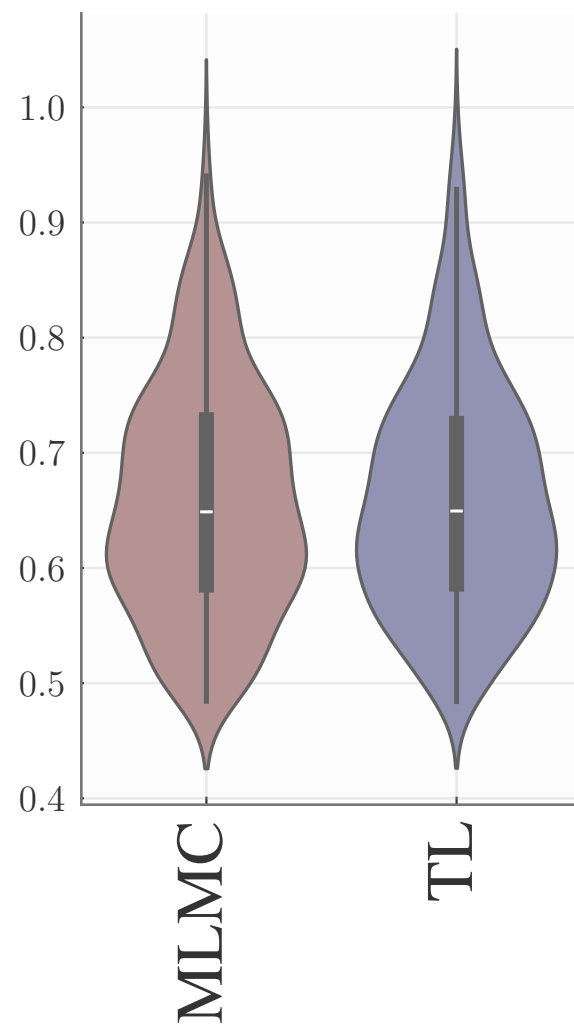

Supplement: supplementary_material [file oup_c2st_marginal.pdf › multilevel-sbi-main/figure/oup_c2st_marginal.pdf]

$$n_1 = 10$$

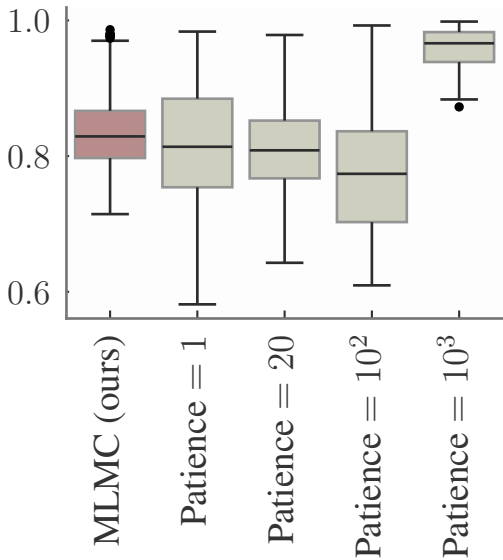

Supplement: supplementary_material [file oup_c2st_n1_10.pdf › multilevel-sbi-main/figure/oup_c2st_n1_10.pdf]

$$n_1 = 100$$

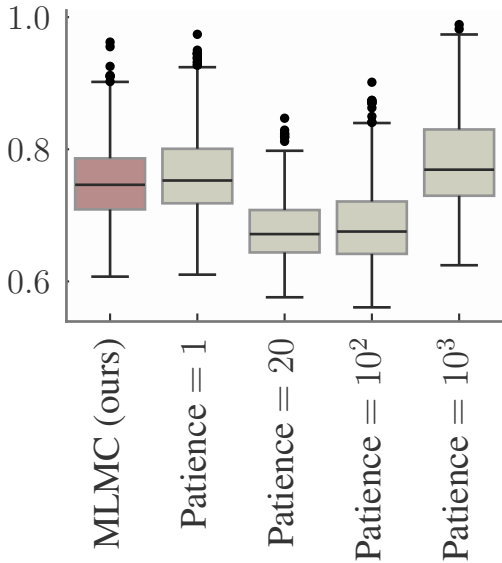

Supplement: supplementary_material [file oup_c2st_n1_100.pdf › multilevel-sbi-main/figure/oup_c2st_n1_100.pdf]

$$n_1 = 50$$

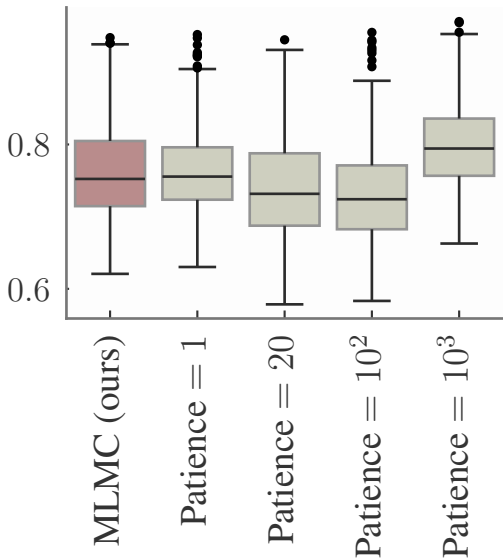

Supplement: supplementary_material [file oup_c2st_n1_50.pdf › multilevel-sbi-main/figure/oup_c2st_n1_50.pdf]

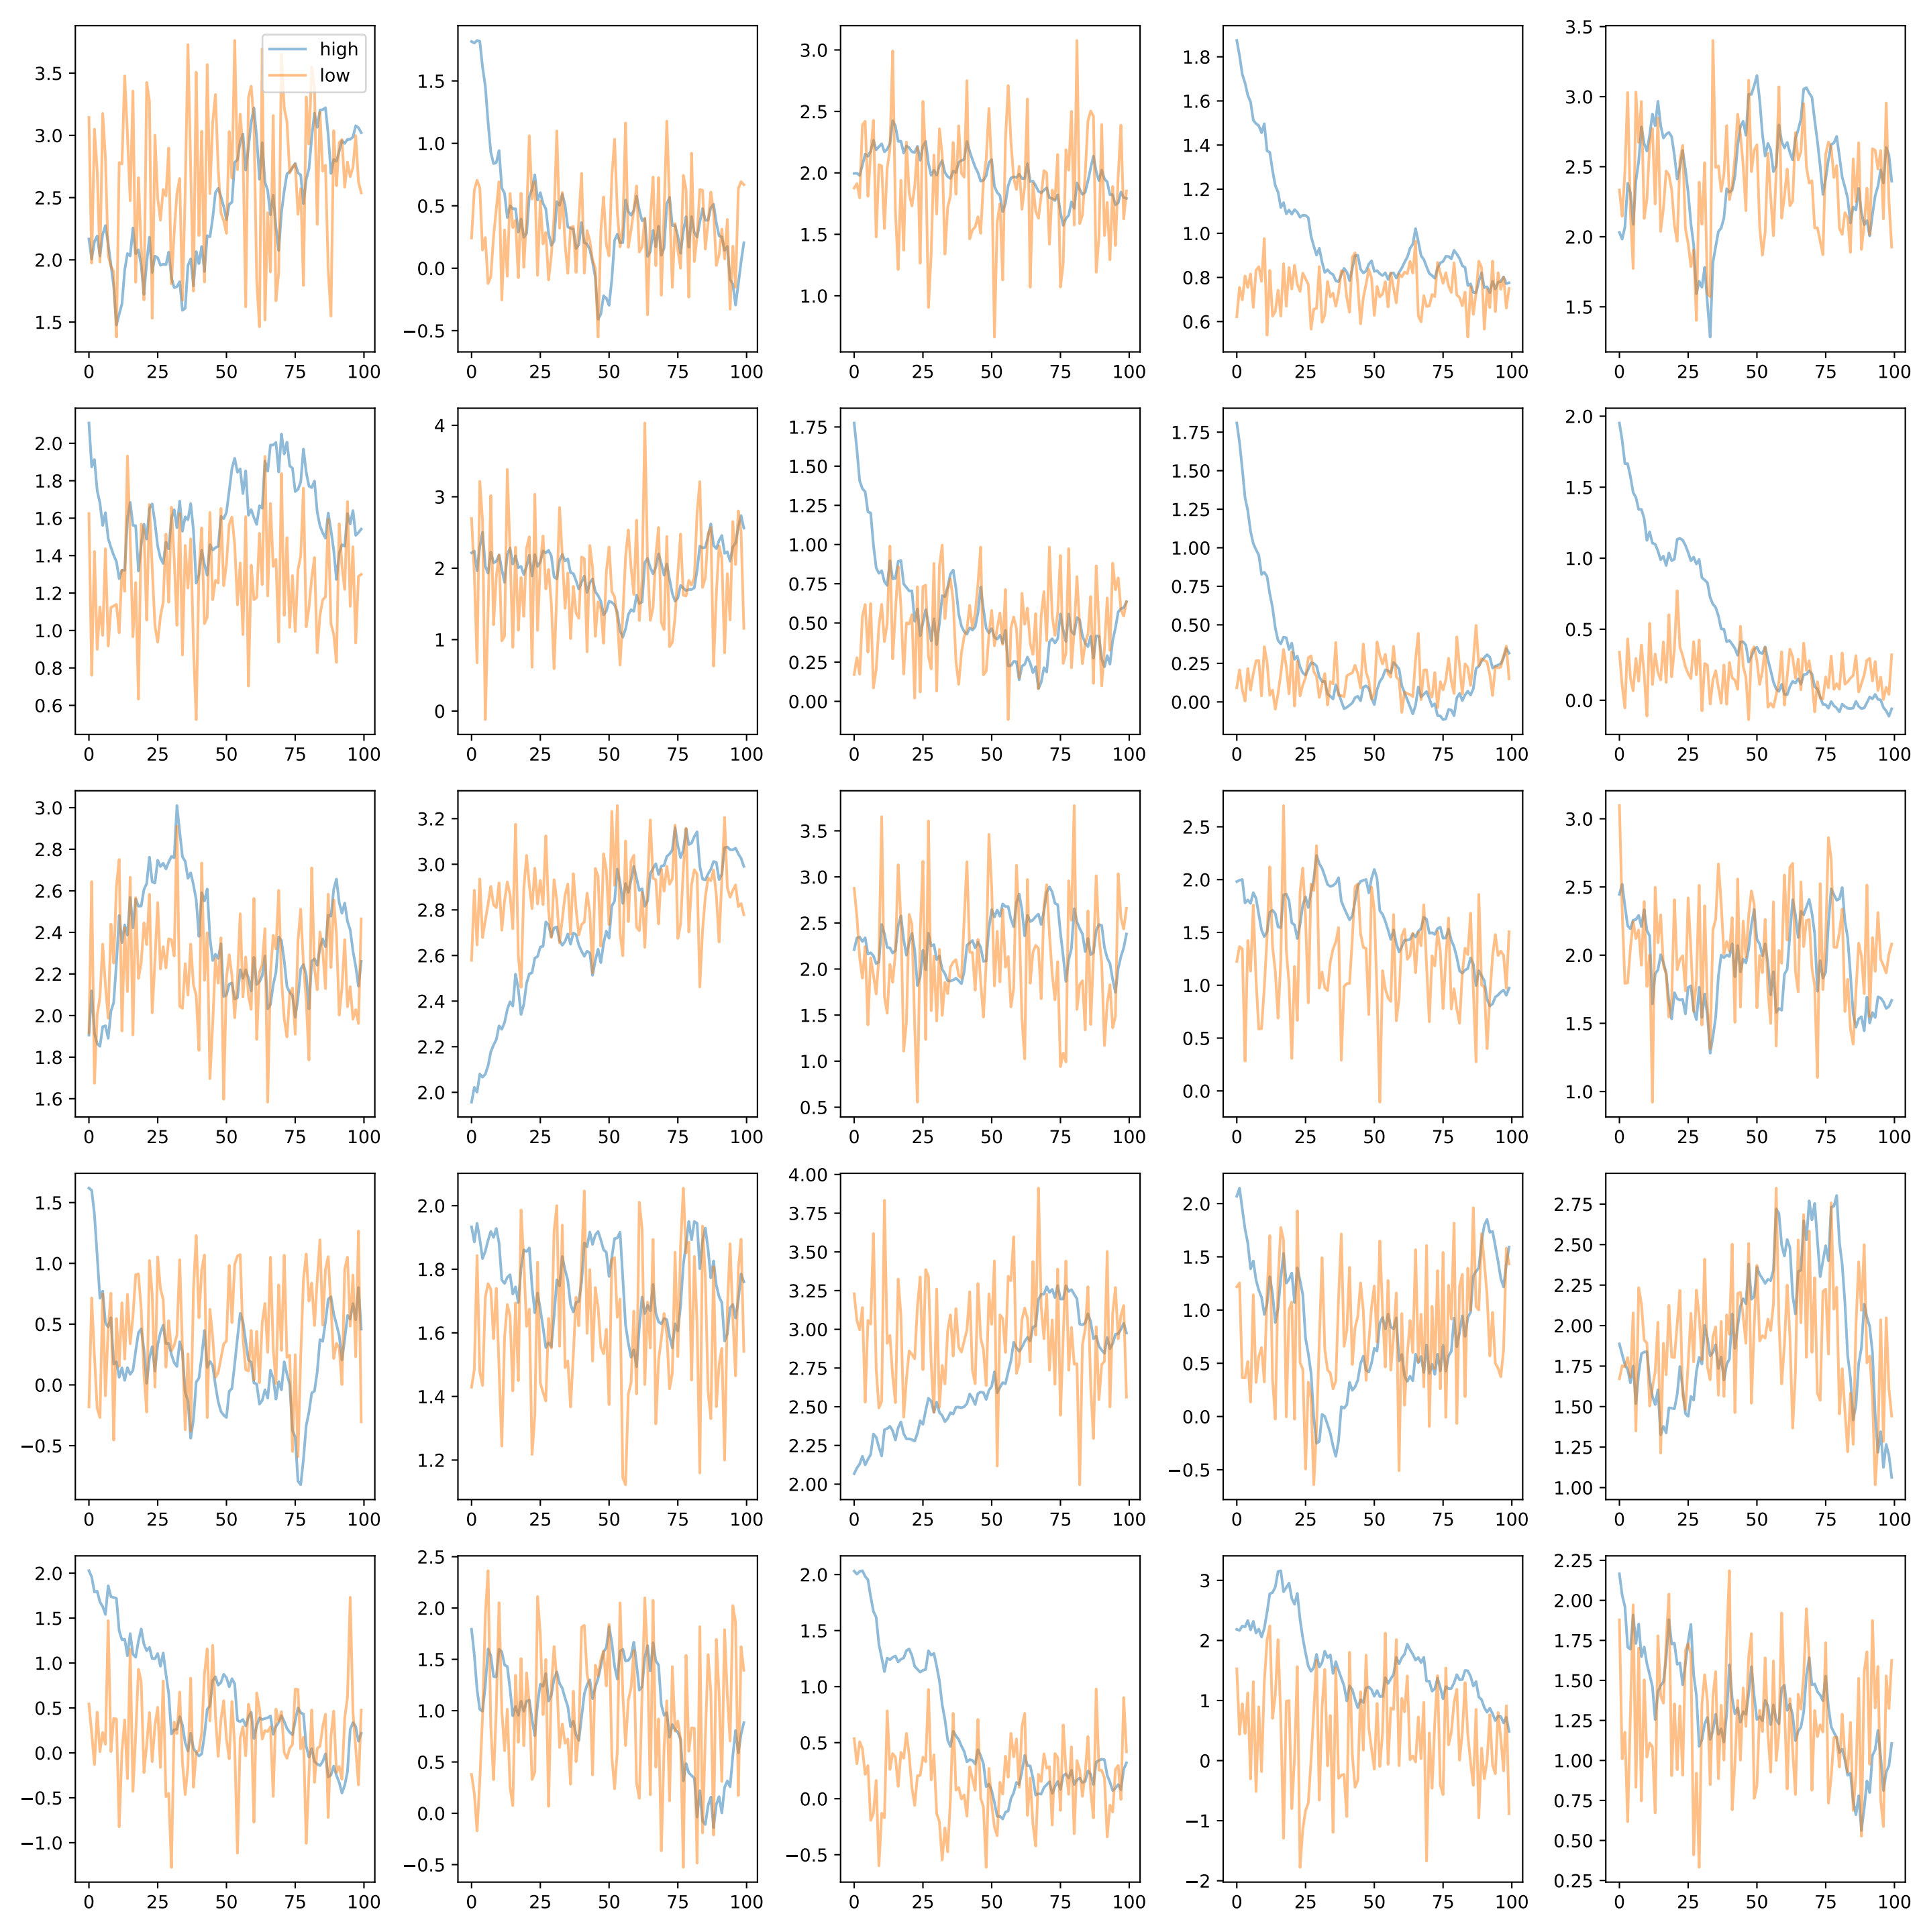

Supplement: supplementary_material [file oup_different_theta.pdf › multilevel-sbi-main/figure/oup_different_theta.pdf]

KLD

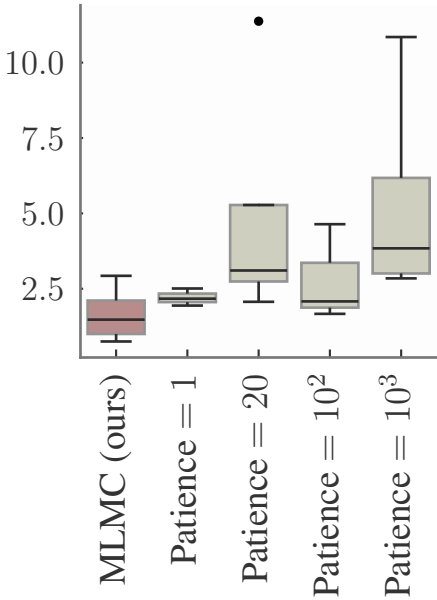

Supplement: supplementary_material [file oup_kl_10.pdf › multilevel-sbi-main/figure/oup_kl_10.pdf]

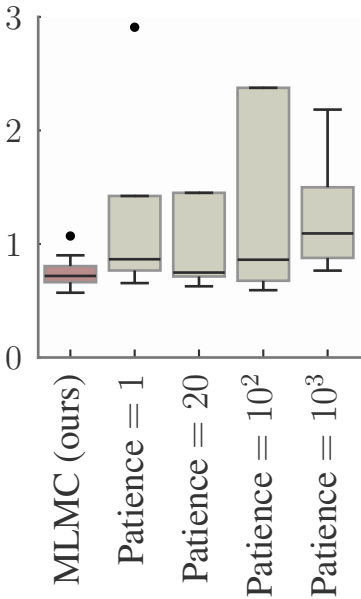

Supplement: supplementary_material [file oup_kl_100.pdf › multilevel-sbi-main/figure/oup_kl_100.pdf]

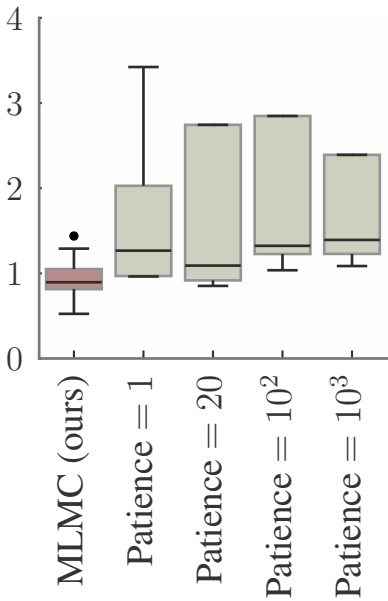

Supplement: supplementary_material [file oup_kl_50.pdf › multilevel-sbi-main/figure/oup_kl_50.pdf]

# ML-NPE (ours)

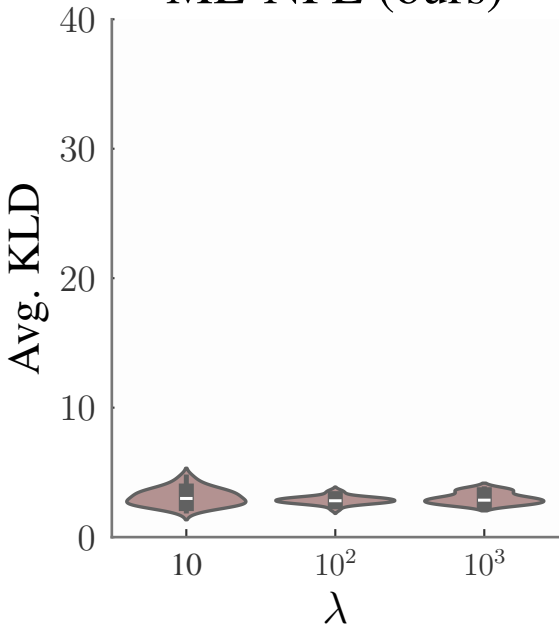

Supplement: supplementary_material [file oup_kl_lambda.pdf › multilevel-sbi-main/figure/oup_kl_lambda.pdf]

# TL-NPE

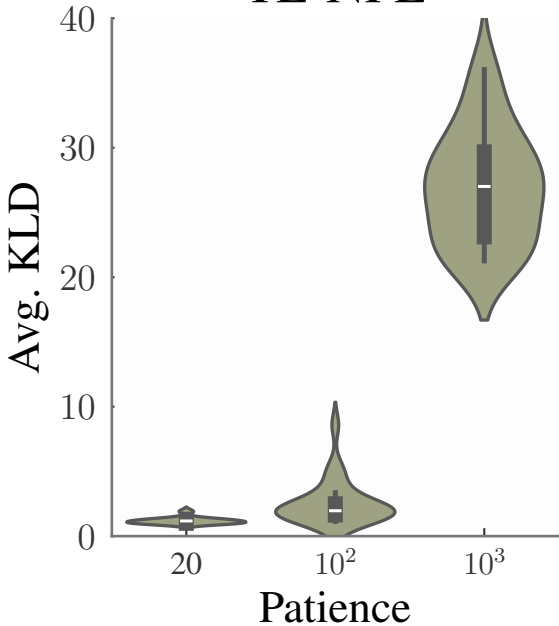

Supplement: supplementary_material [file oup_kl_patience.pdf › multilevel-sbi-main/figure/oup_kl_patience.pdf]

MMD

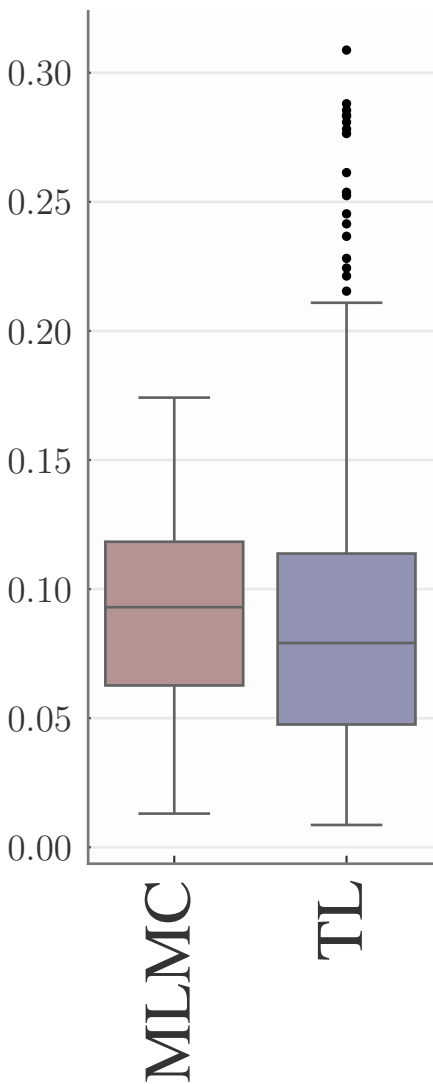

Supplement: supplementary_material [file oup_mmd.pdf › multilevel-sbi-main/figure/oup_mmd.pdf]

MMD

0.30  
0.25  
0.20  
0.15  
0.10  
0.05  
0.00

MLMC

TL

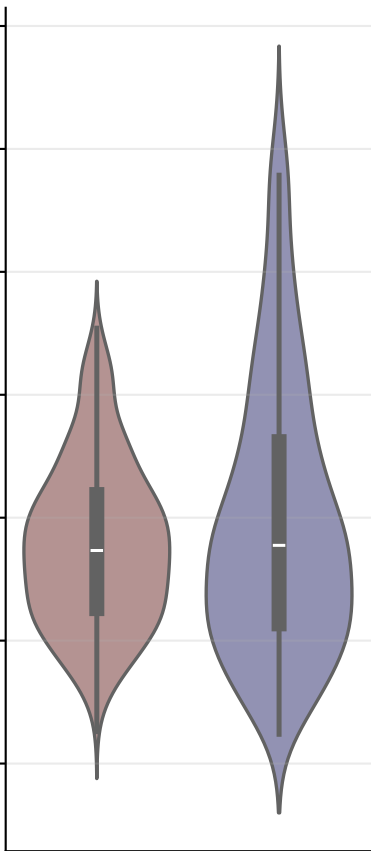

Supplement: supplementary_material [file oup_mmd_different_summary.pdf › multilevel-sbi-main/figure/oup_mmd_different_summary.pdf]

NLTP

100  
80  
60  
40  
20  
0

MLMC

TL

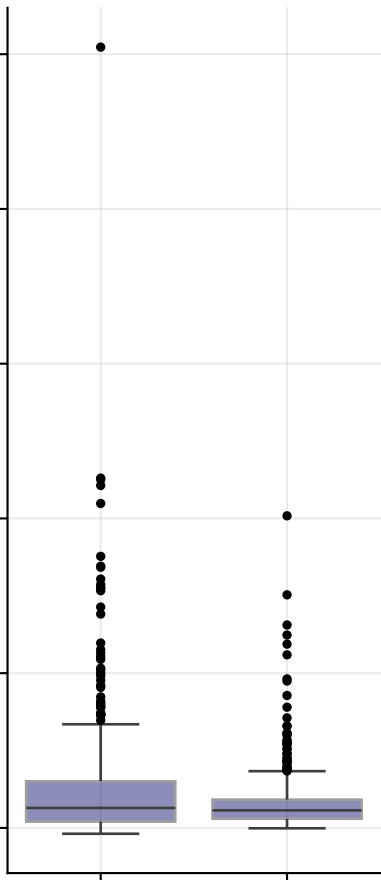

Supplement: supplementary_material [file oup_nlpd.pdf › multilevel-sbi-main/figure/oup_nlpd.pdf]

$n = 10$

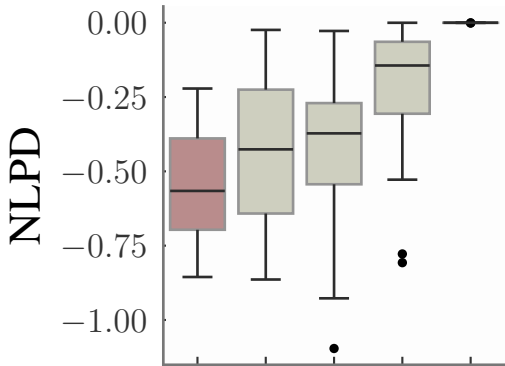

Supplement: supplementary_material [file oup_nlpd_10.pdf › multilevel-sbi-main/figure/oup_nlpd_10.pdf]

$n = 100$

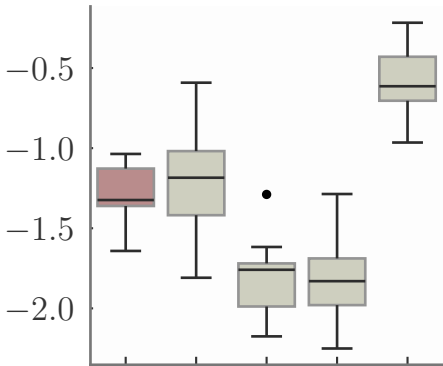

Supplement: supplementary_material [file oup_nlpd_100.pdf › multilevel-sbi-main/figure/oup_nlpd_100.pdf]

$n = 50$

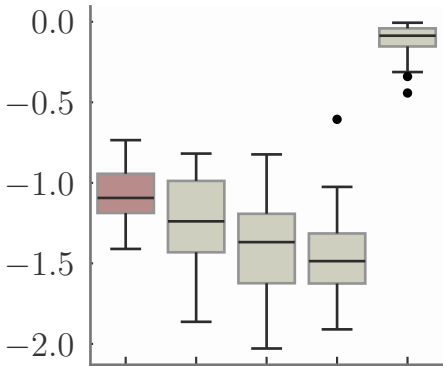

Supplement: supplementary_material [file oup_nlpd_50.pdf › multilevel-sbi-main/figure/oup_nlpd_50.pdf]

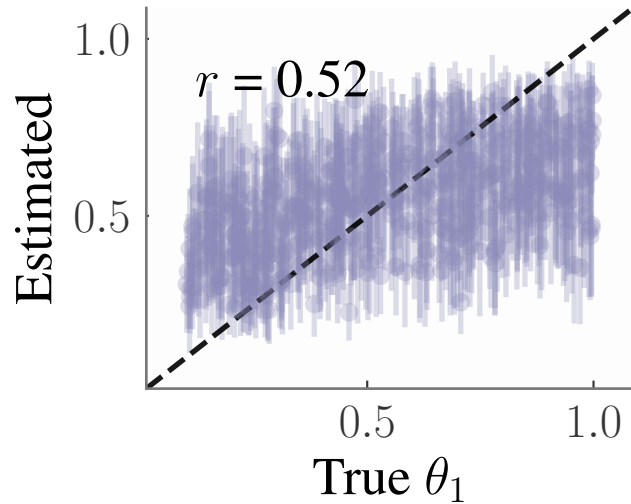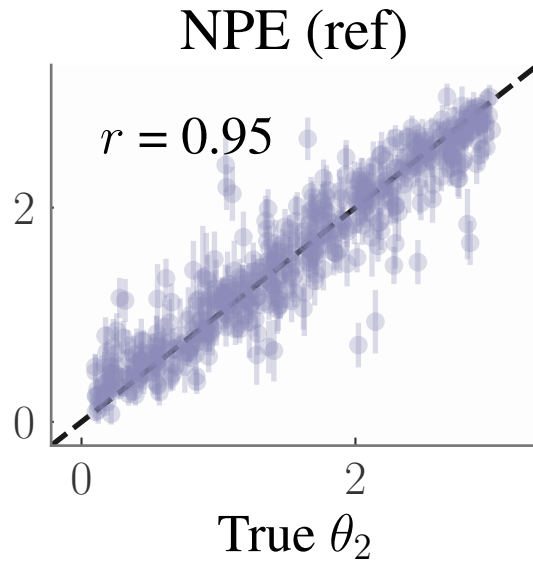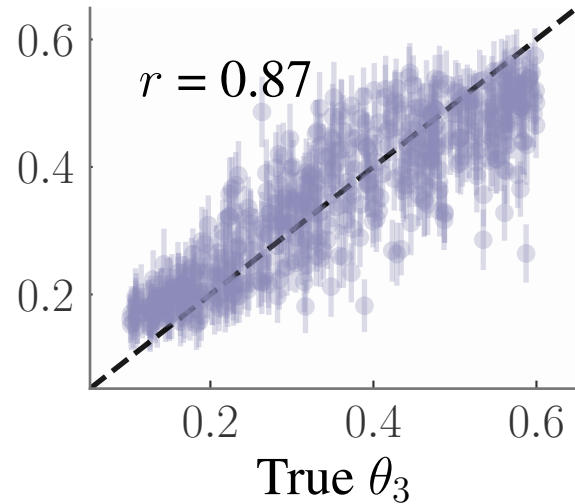

Supplement: supplementary_material [file oup_recovery_mc.pdf › multilevel-sbi-main/figure/oup_recovery_mc.pdf]

Estimated

$\gamma$

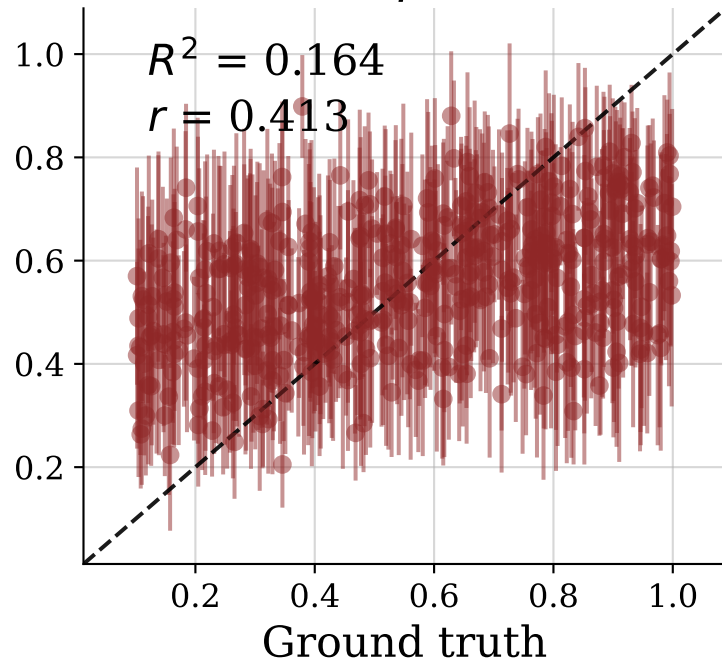

$\mu$

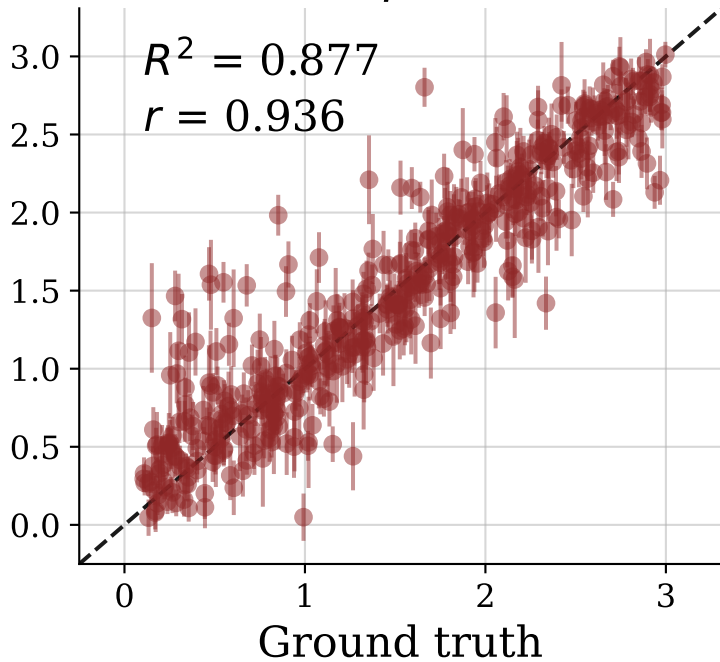

$\sigma$

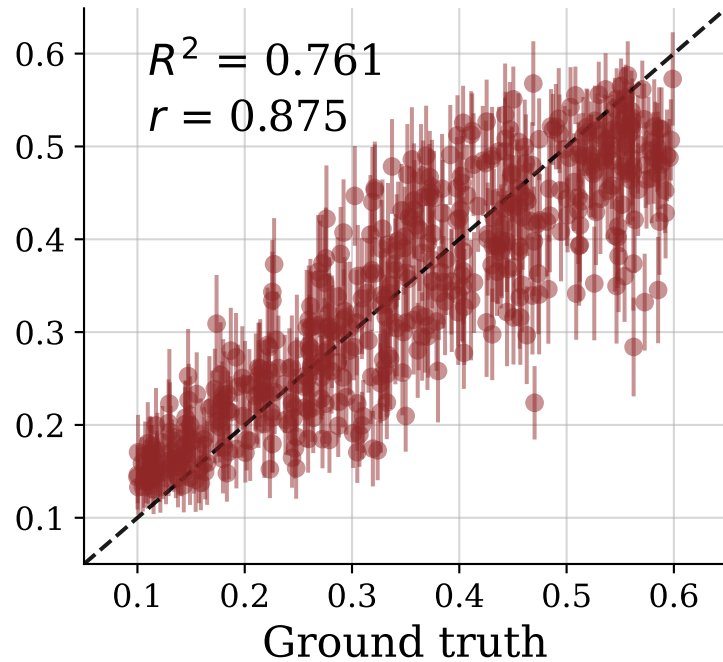

Supplement: supplementary_material [file oup_recovery_mc_different_summary.pdf › multilevel-sbi-main/figure/oup_recovery_mc_different_summary.pdf]

ML-NPE ( $n_1 = 10$ )

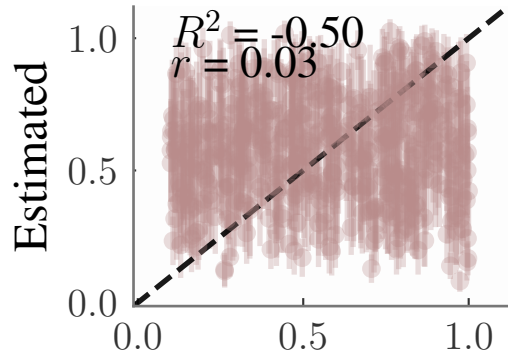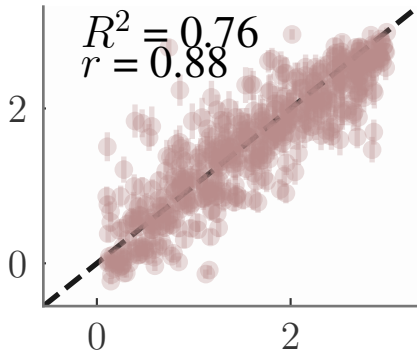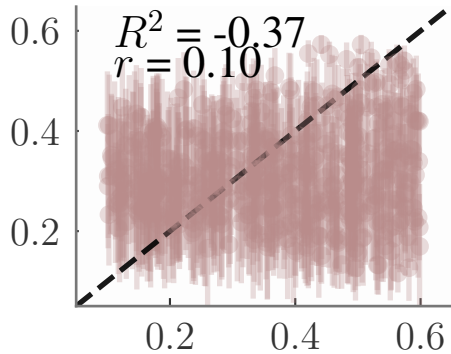

Supplement: supplementary_material [file oup_recovery_ml_10.pdf › multilevel-sbi-main/figure/oup_recovery_ml_10.pdf]

Estimated

ML-NPE ( $n_1 = 100$ )

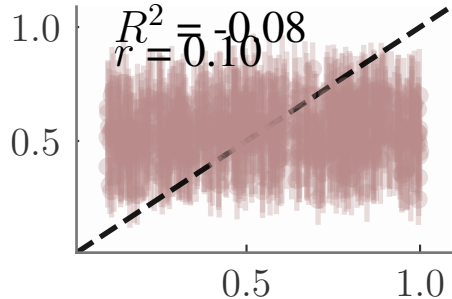

True  $\gamma$

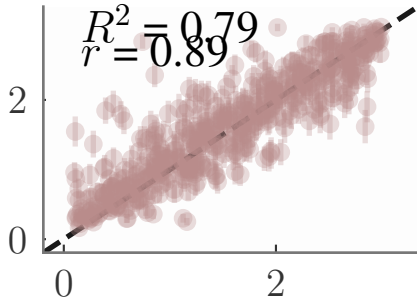

True  $\mu$

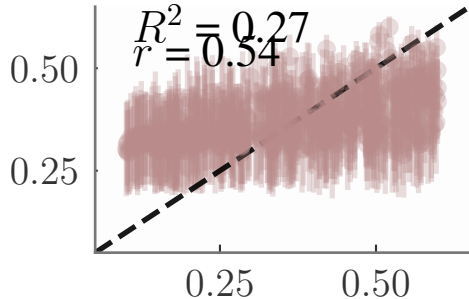

True  $\sigma$

Supplement: supplementary_material [file oup_recovery_ml_100.pdf › multilevel-sbi-main/figure/oup_recovery_ml_100.pdf]

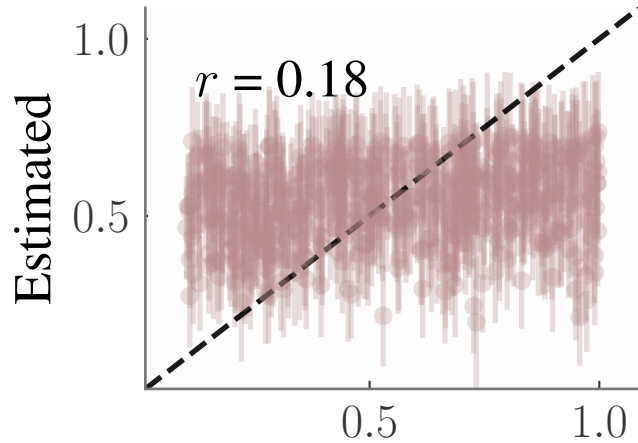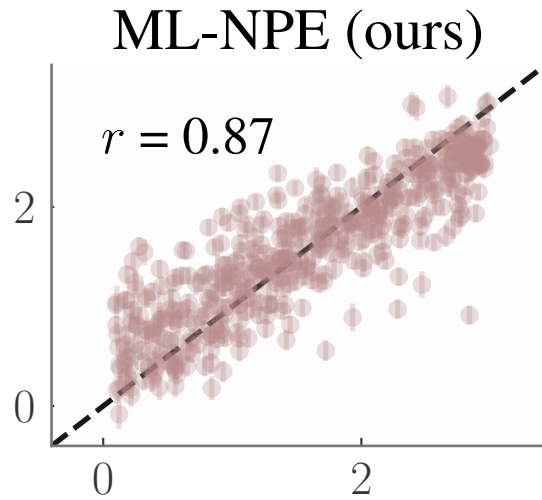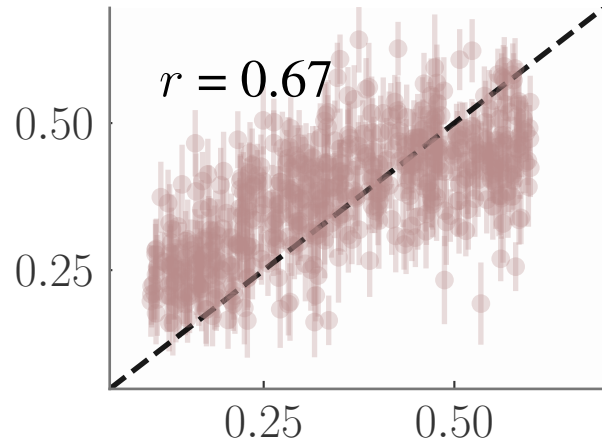

Supplement: supplementary_material [file oup_recovery_mlmc.pdf › multilevel-sbi-main/figure/oup_recovery_mlmc.pdf]

Estimated

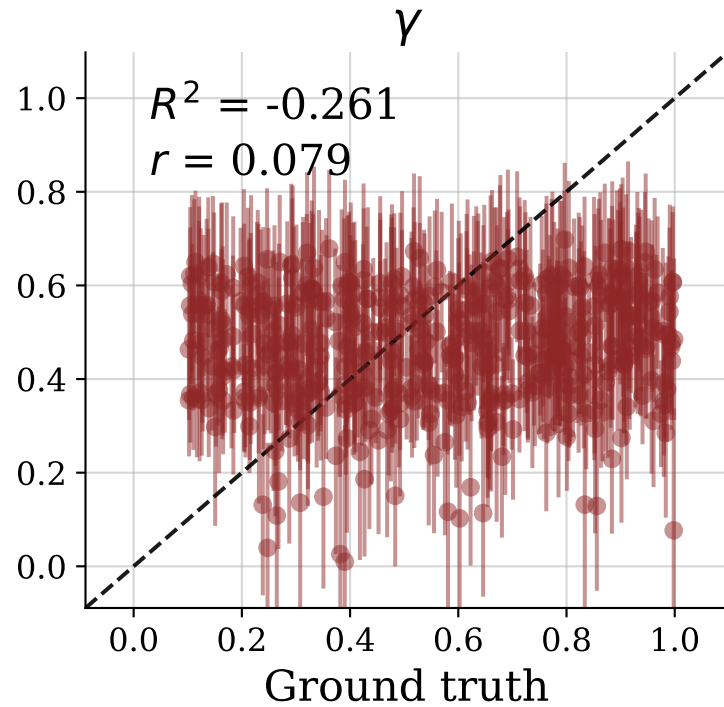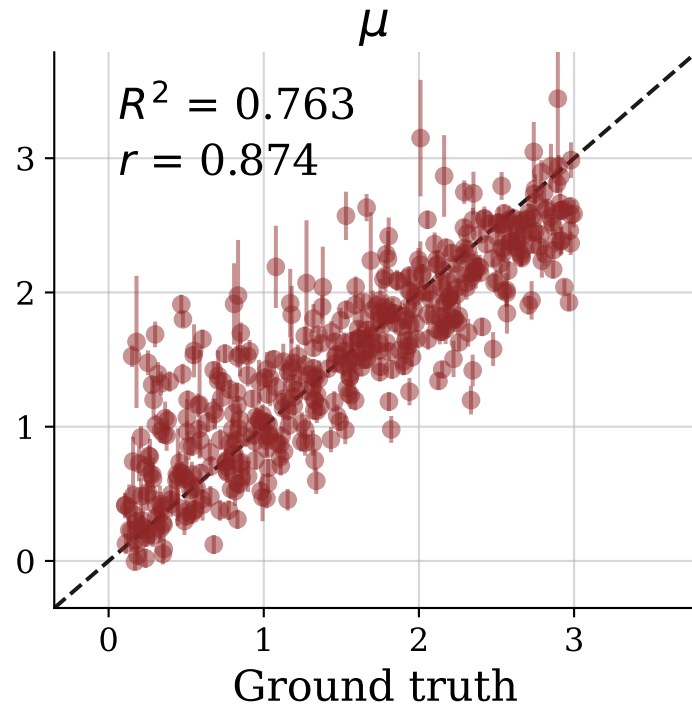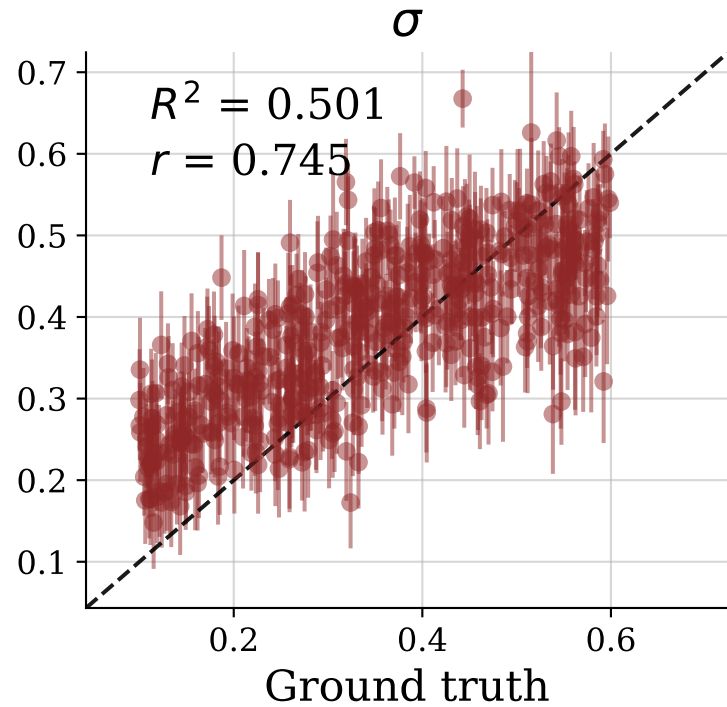

Supplement: supplementary_material [file oup_recovery_mlmc_different_summary.pdf › multilevel-sbi-main/figure/oup_recovery_mlmc_different_summary.pdf]

NPE reference ( $n = 10000$ )

Estimated

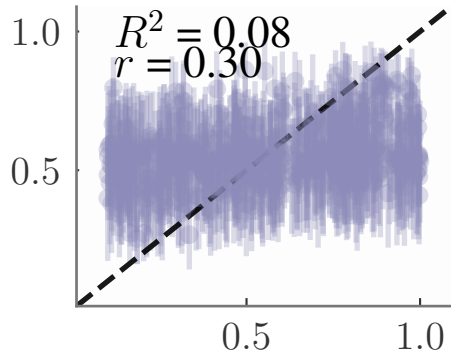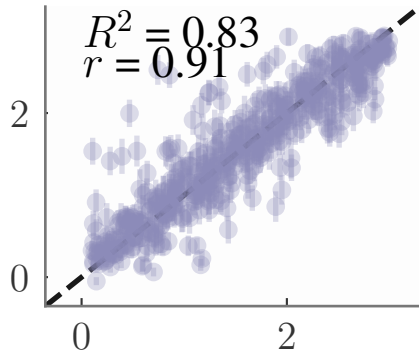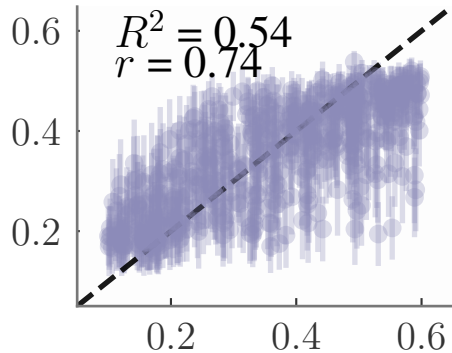

Supplement: supplementary_material [file oup_recovery_ref.pdf › multilevel-sbi-main/figure/oup_recovery_ref.pdf]

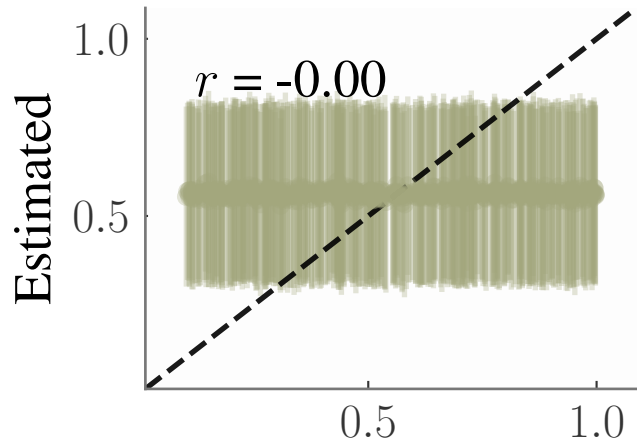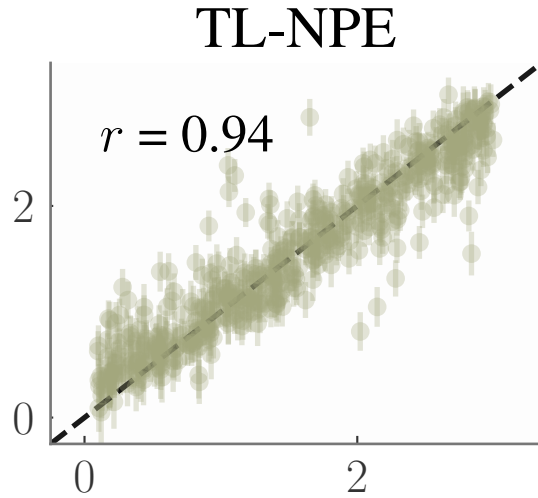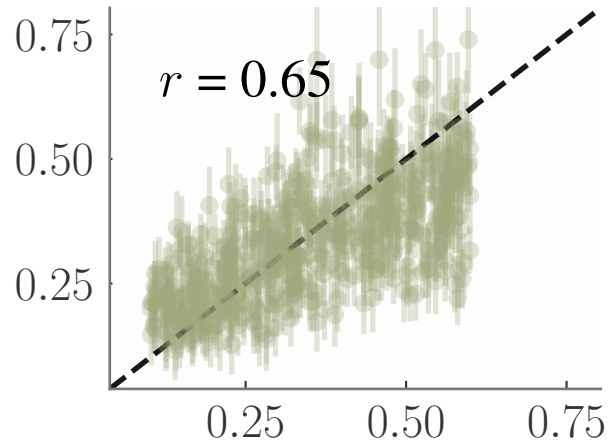

Supplement: supplementary_material [file oup_recovery_tl.pdf › multilevel-sbi-main/figure/oup_recovery_tl.pdf]

TL-NPE ( $n_1 = 10$ , patience = 1)

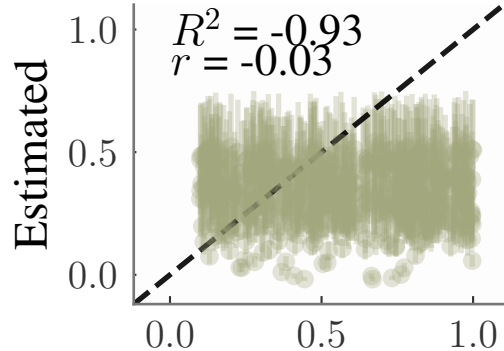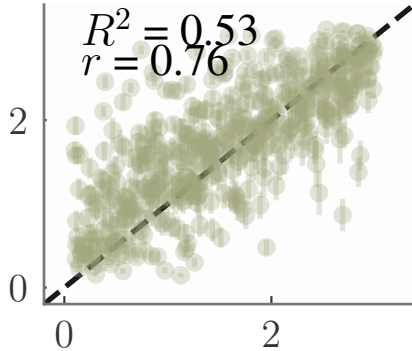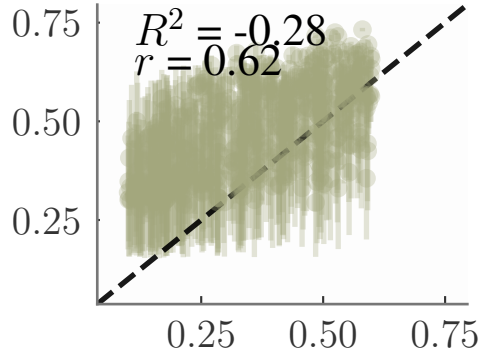

Supplement: supplementary_material [file oup_recovery_tl_10.pdf › multilevel-sbi-main/figure/oup_recovery_tl_10.pdf]

TL-NPE ( $n_1 = 100$ , patience = 20)

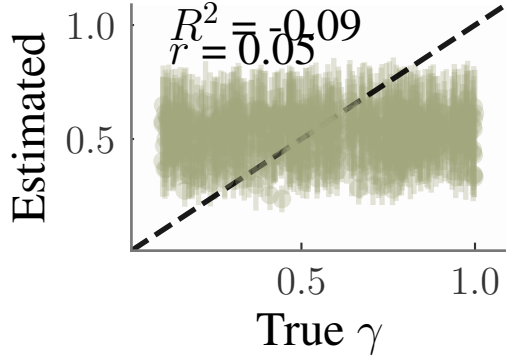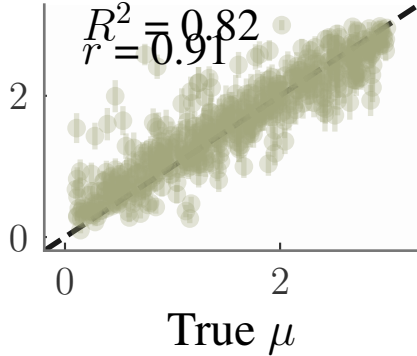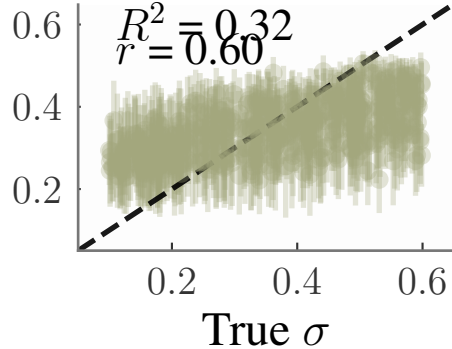

Supplement: supplementary_material [file oup_recovery_tl_100.pdf › multilevel-sbi-main/figure/oup_recovery_tl_100.pdf]

Estimated

$\gamma$

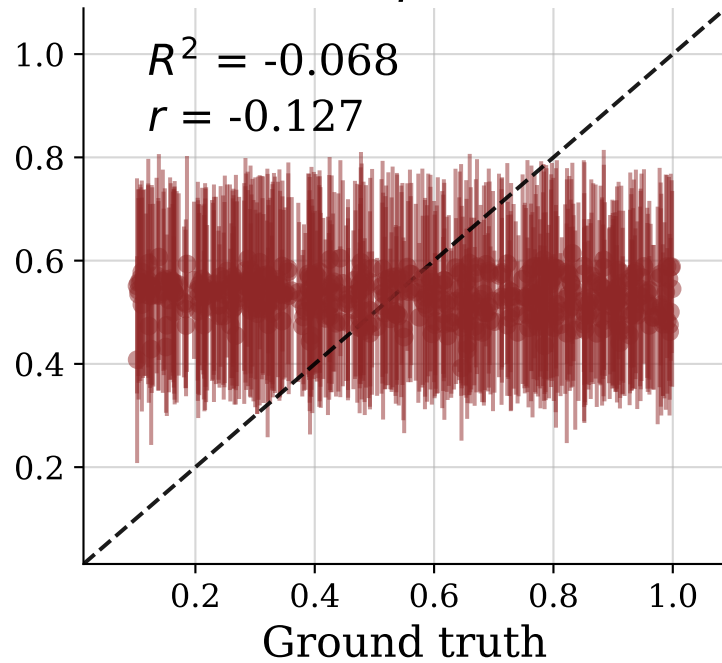

$\mu$

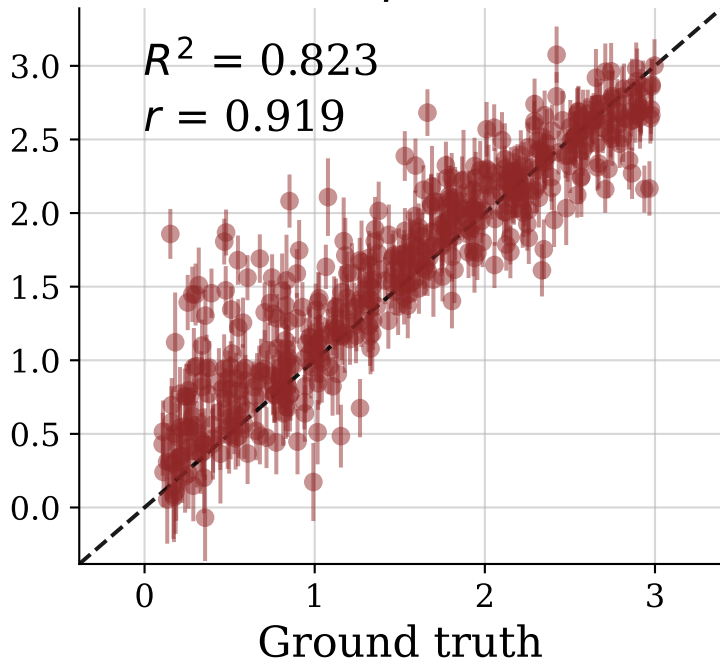

$\sigma$

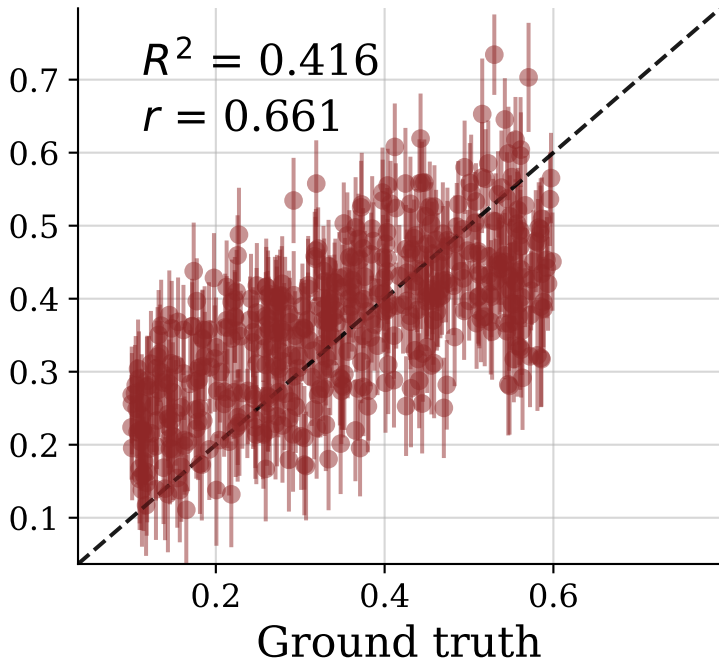

Supplement: supplementary_material [file oup_recovery_tl_different_summary.pdf › multilevel-sbi-main/figure/oup_recovery_tl_different_summary.pdf]

RMSE

$\gamma$

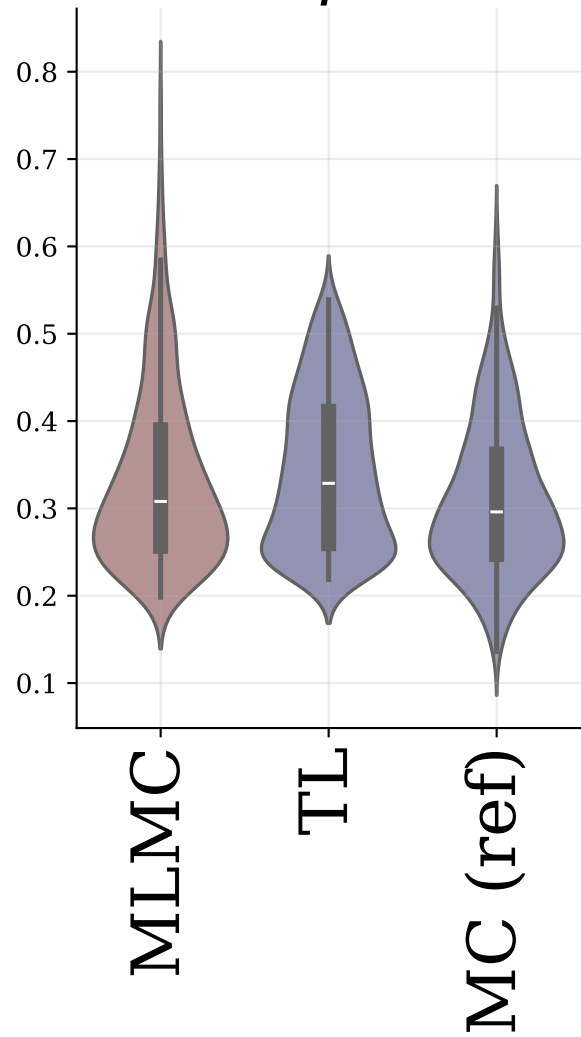

$\mu$

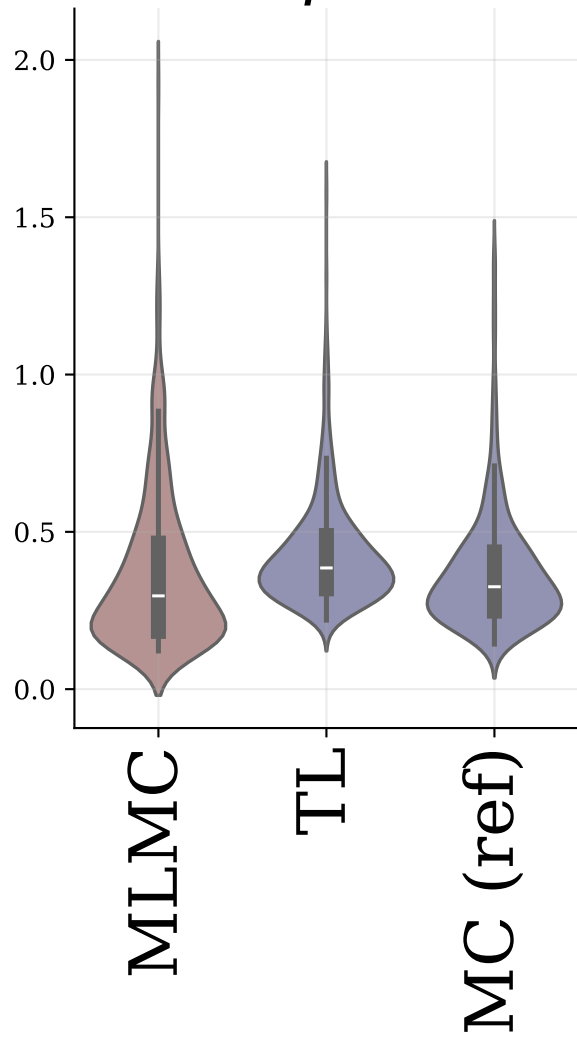

$\sigma$

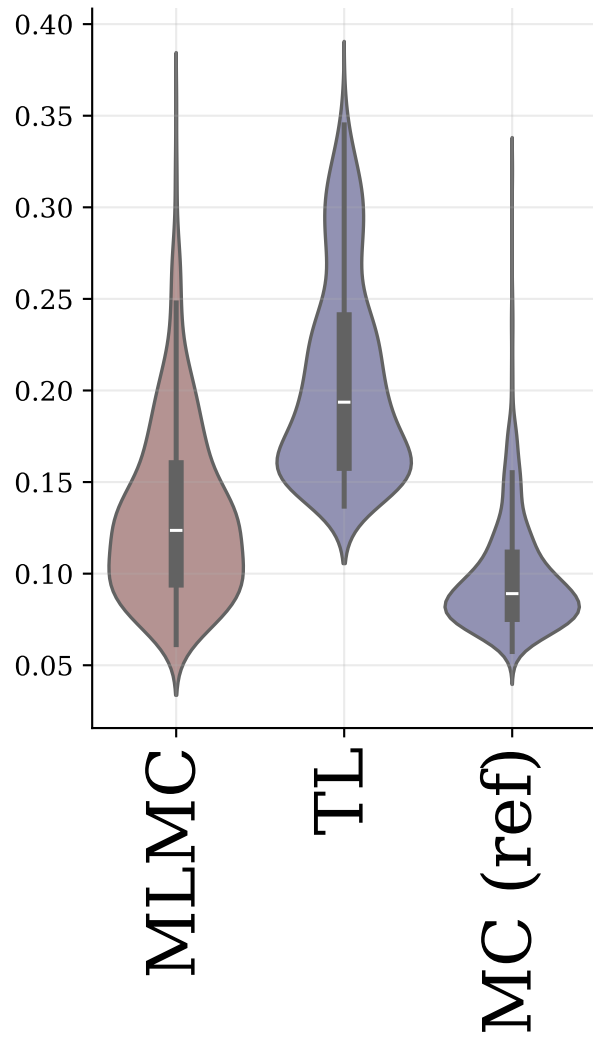

Supplement: supplementary_material [file oup_rmse.pdf › multilevel-sbi-main/figure/oup_rmse.pdf]

RMSE

$\gamma$

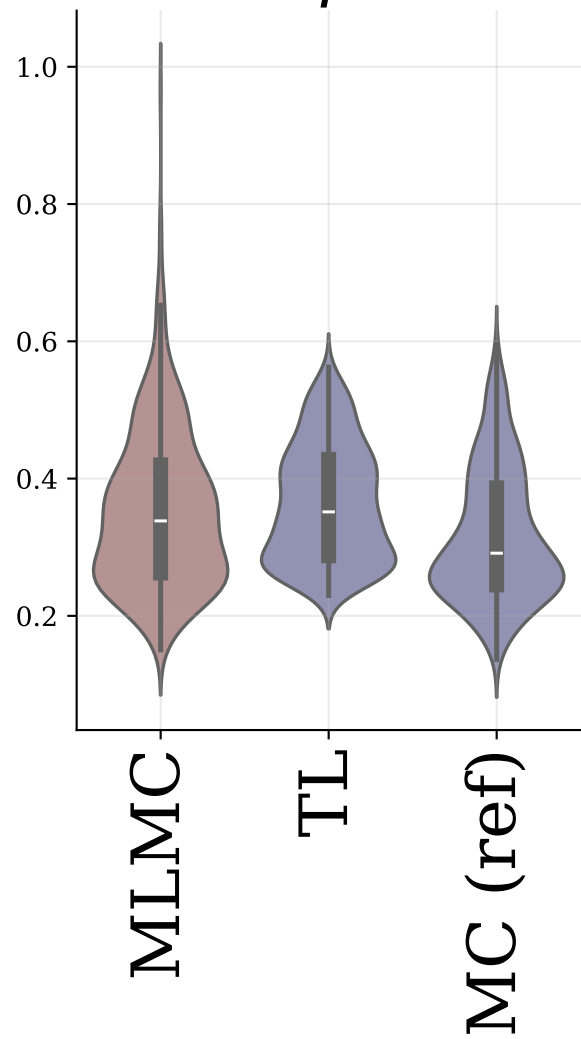

$\mu$

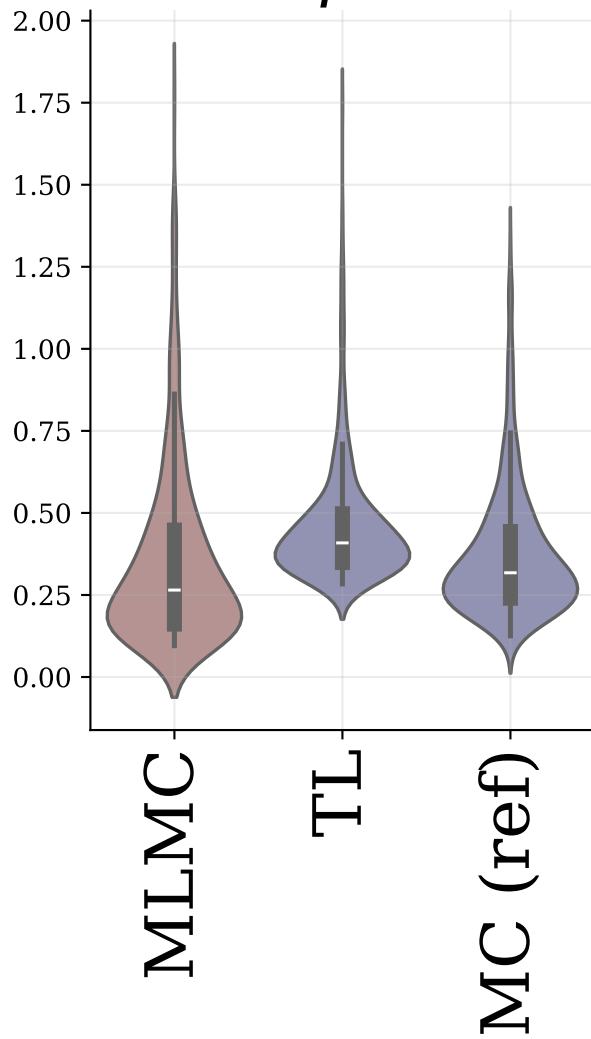

$\sigma$

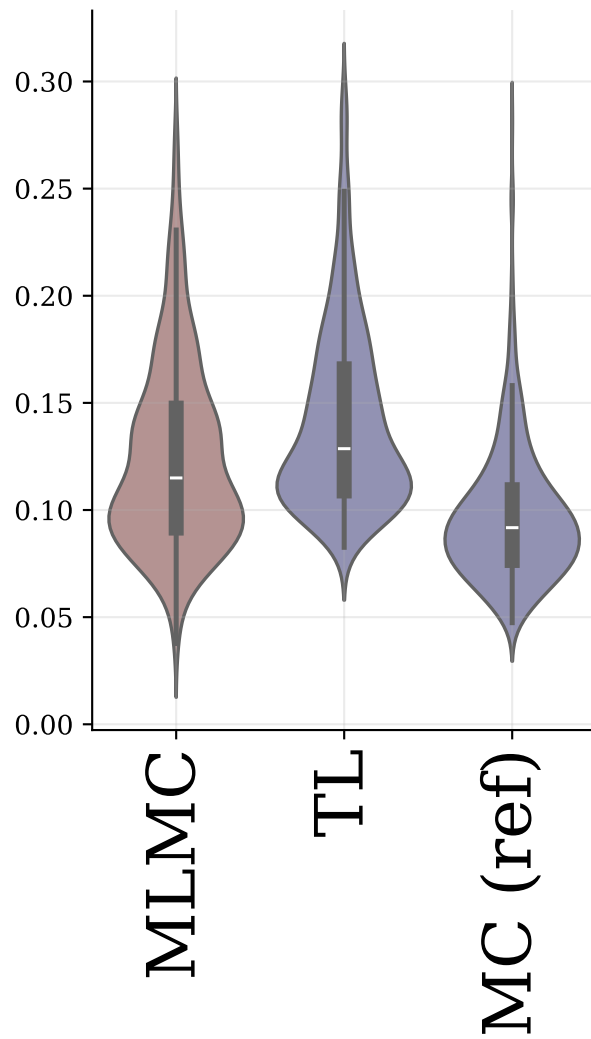

Supplement: supplementary_material [file oup_rmse_different_summary.pdf › multilevel-sbi-main/figure/oup_rmse_different_summary.pdf]

NLPD

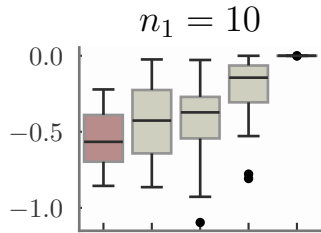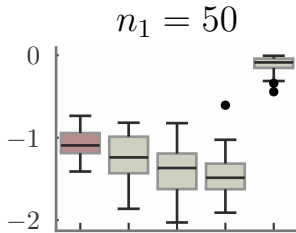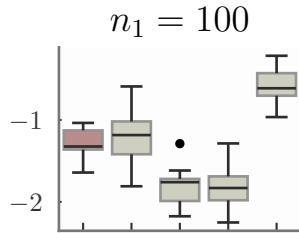

KLD

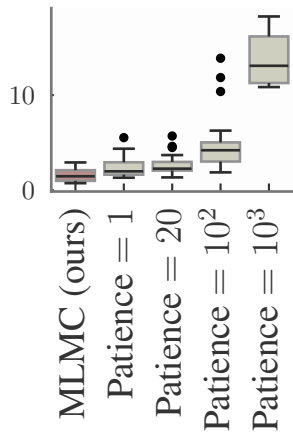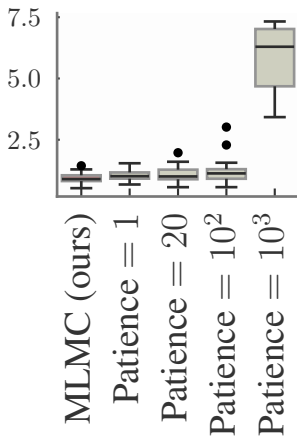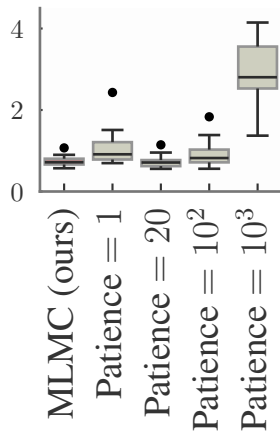

Supplement: supplementary_material [file oup_sensitivity.pdf › multilevel-sbi-main/figure/oup_sensitivity.pdf]

NLPD

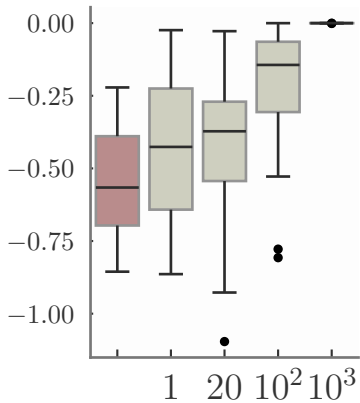

KLD

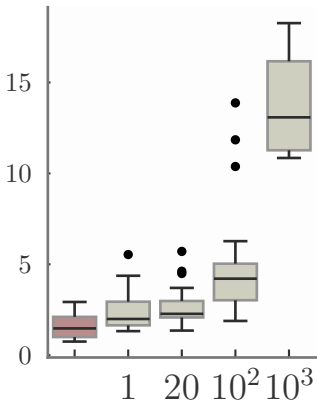

Supplement: supplementary_material [file oup_sensitivity_n1_10.pdf › multilevel-sbi-main/figure/oup_sensitivity_n1_10.pdf]

NLPD

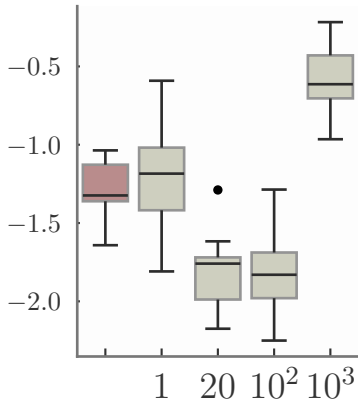

KLD

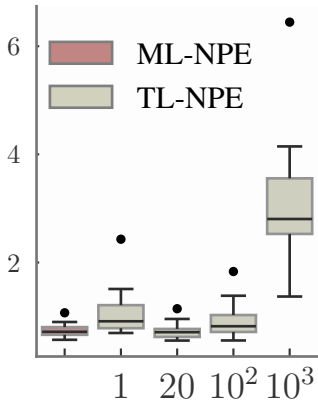

Supplement: supplementary_material [file oup_sensitivity_n1_100.pdf › multilevel-sbi-main/figure/oup_sensitivity_n1_100.pdf]

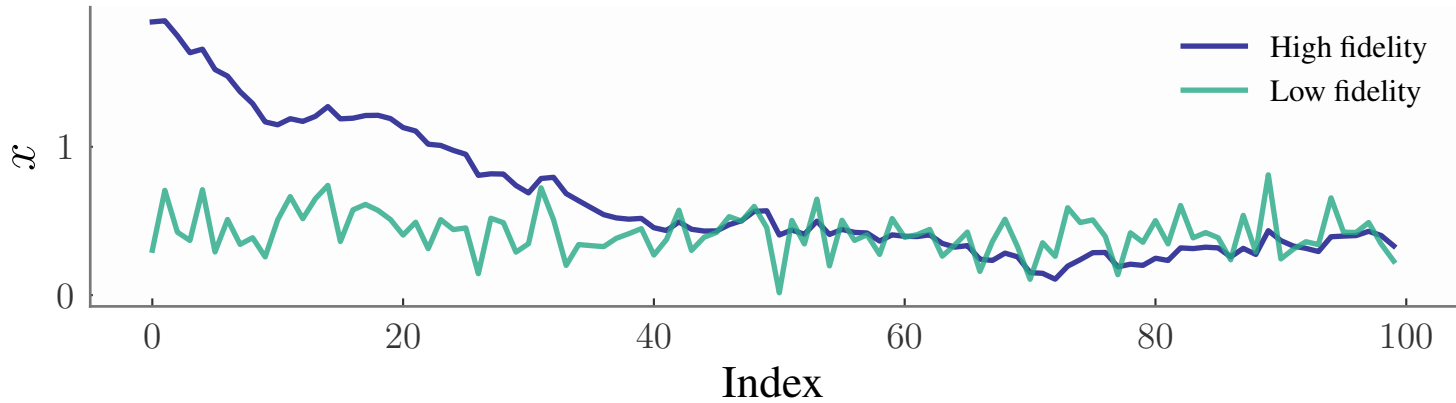

Supplement: supplementary_material [file oup_simulator_high_low.pdf › multilevel-sbi-main/figure/oup_simulator_high_low.pdf]

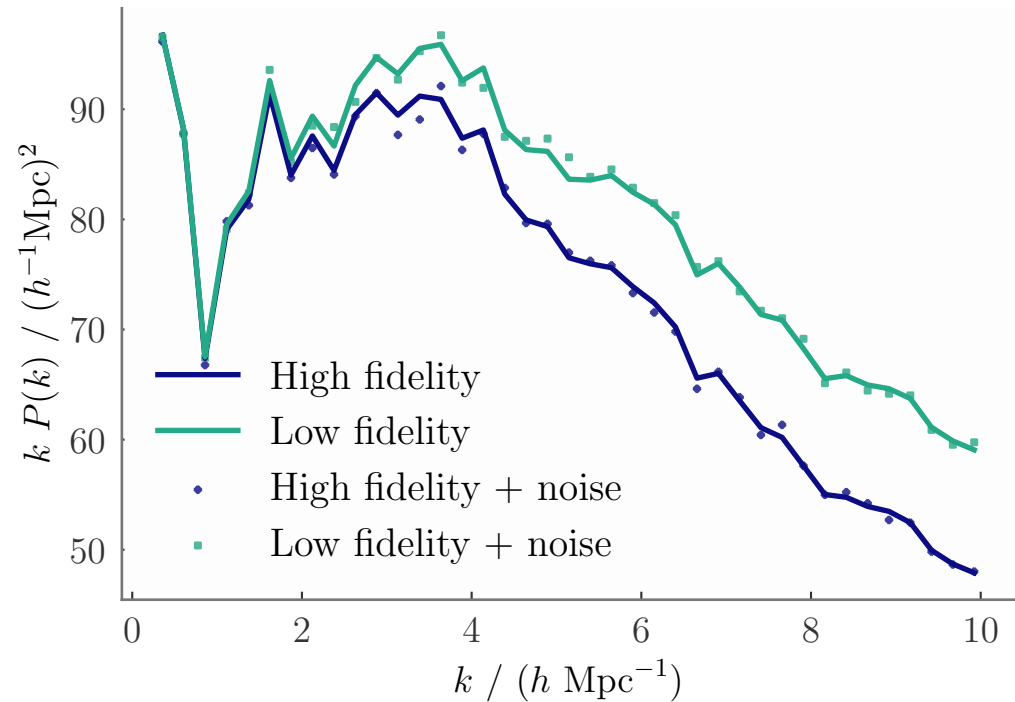

Supplement: supplementary_material [file pk_noise_realization.pdf › multilevel-sbi-main/figure/pk_noise_realization.pdf]

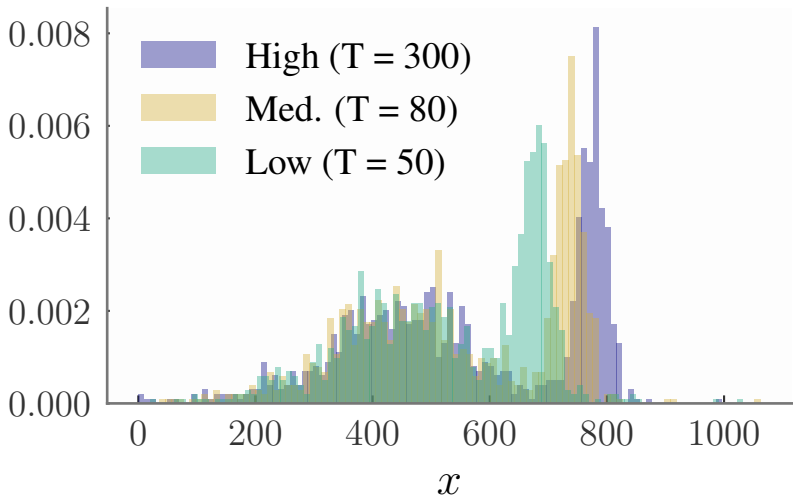

Supplement: supplementary_material [file toggle_switch_high_med_low.pdf › multilevel-sbi-main/figure/toggle_switch_high_med_low.pdf]

MMD

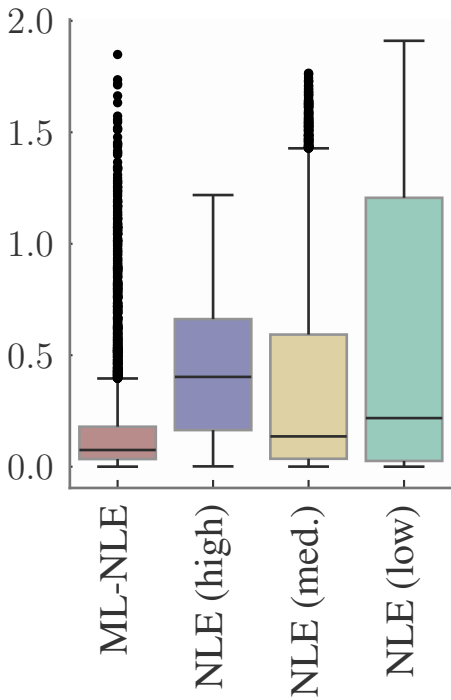

Supplement: supplementary_material [file toggle_switch_mmd.pdf › multilevel-sbi-main/figure/toggle_switch_mmd.pdf]

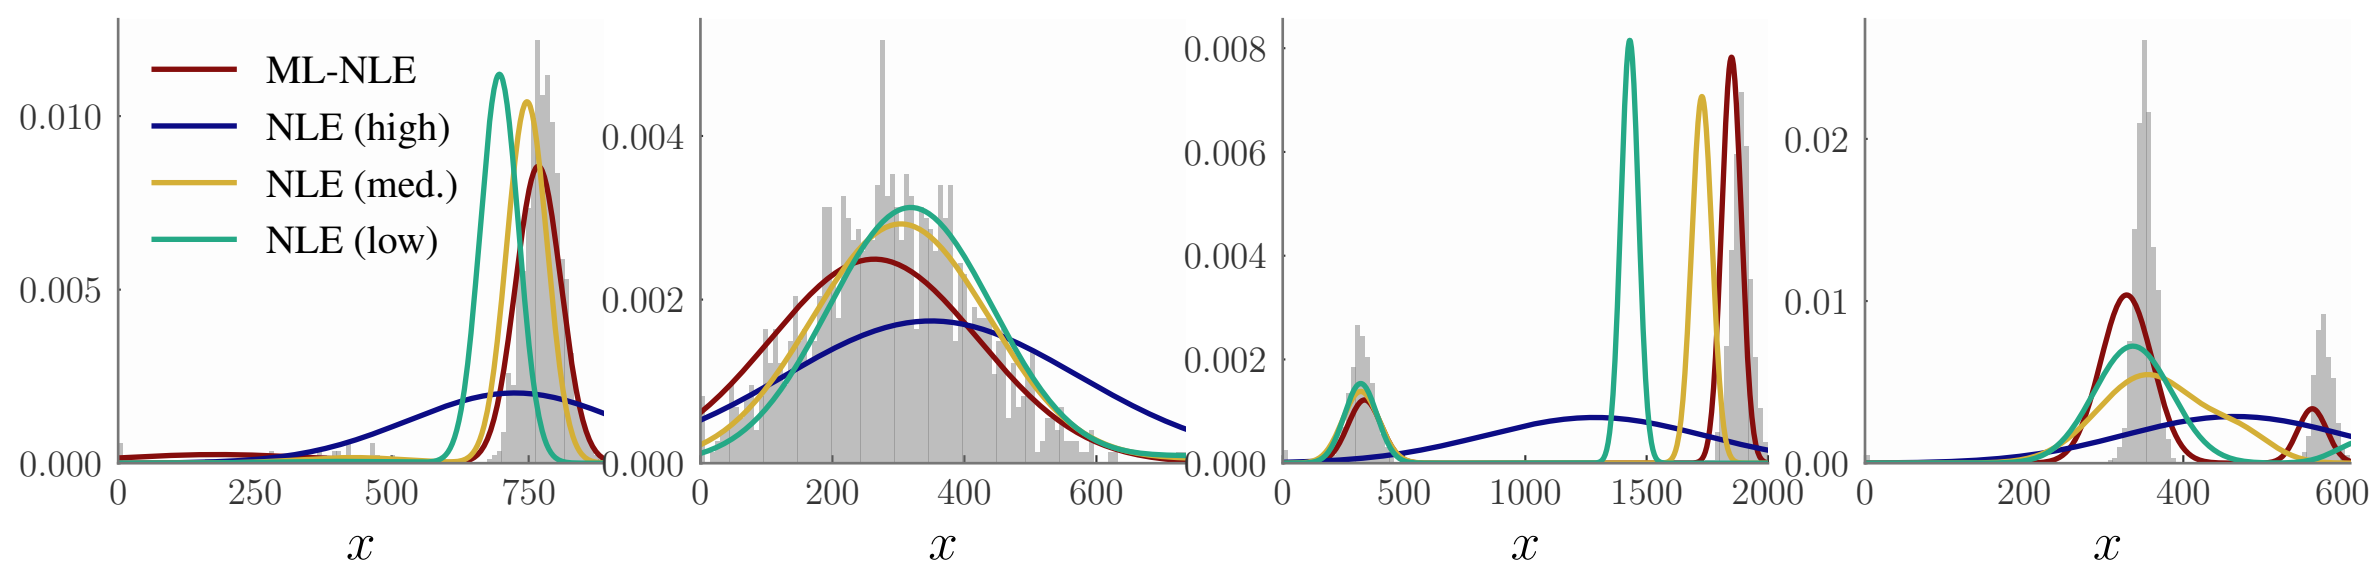

Supplement: supplementary_material [file ts_density.pdf › multilevel-sbi-main/figure/ts_density.pdf]

MLMC

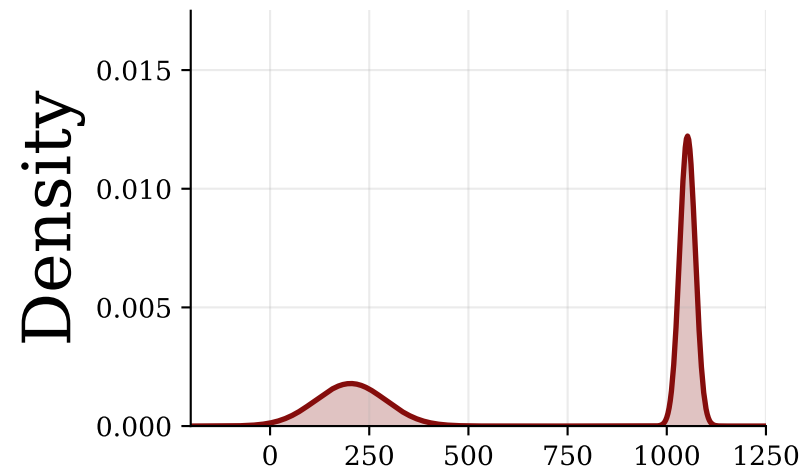

MC (only high)

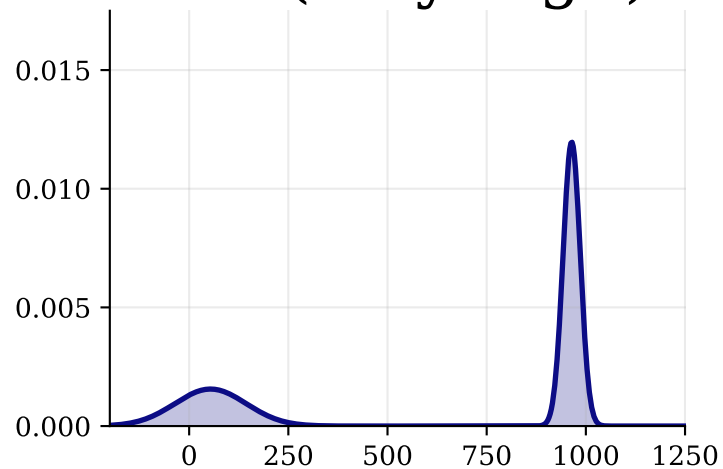

MC (only low)

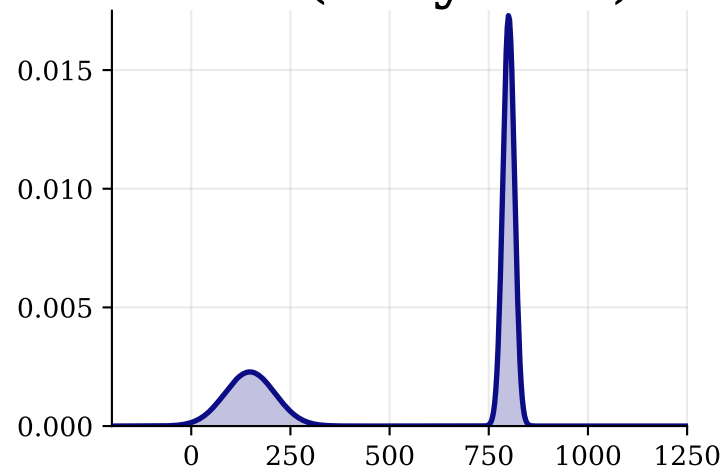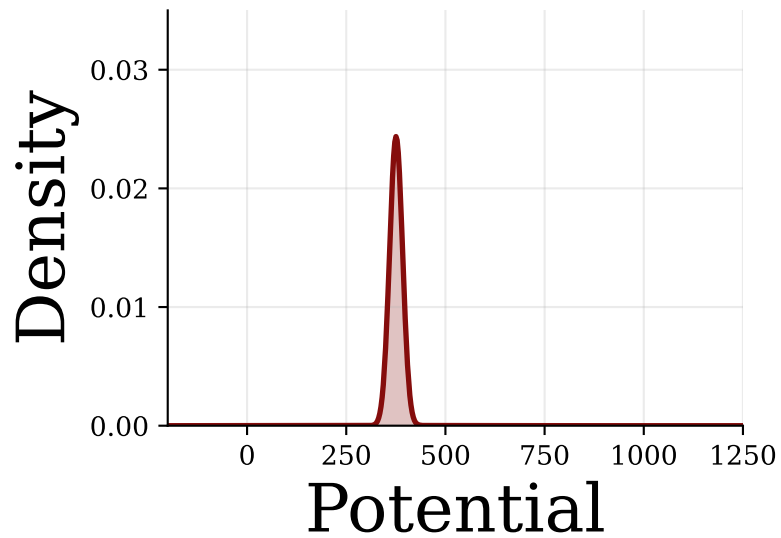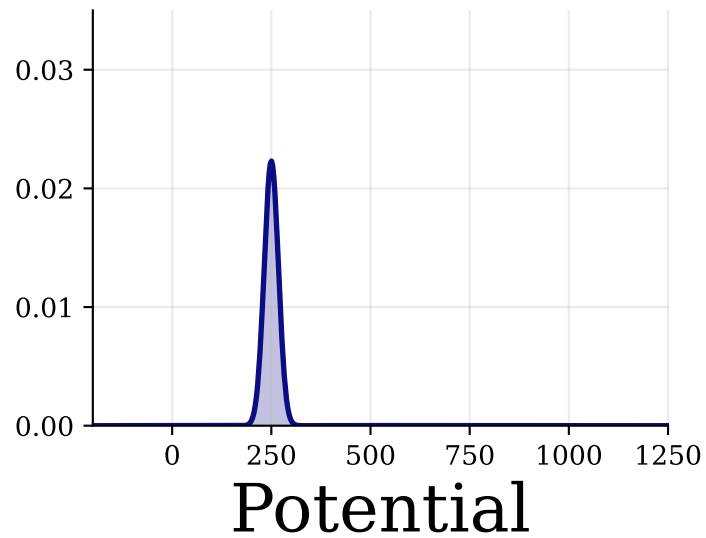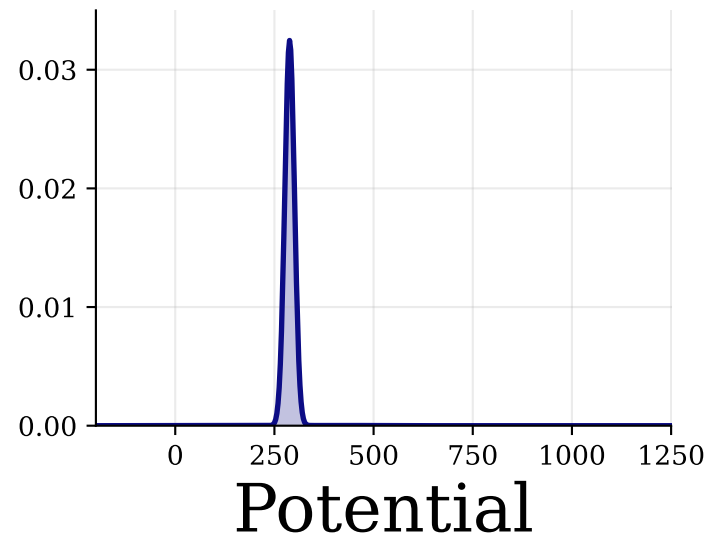

Supplement: supplementary_material [file ts_density_comparison.pdf › multilevel-sbi-main/figure/ts_density_comparison.pdf]

MLMC

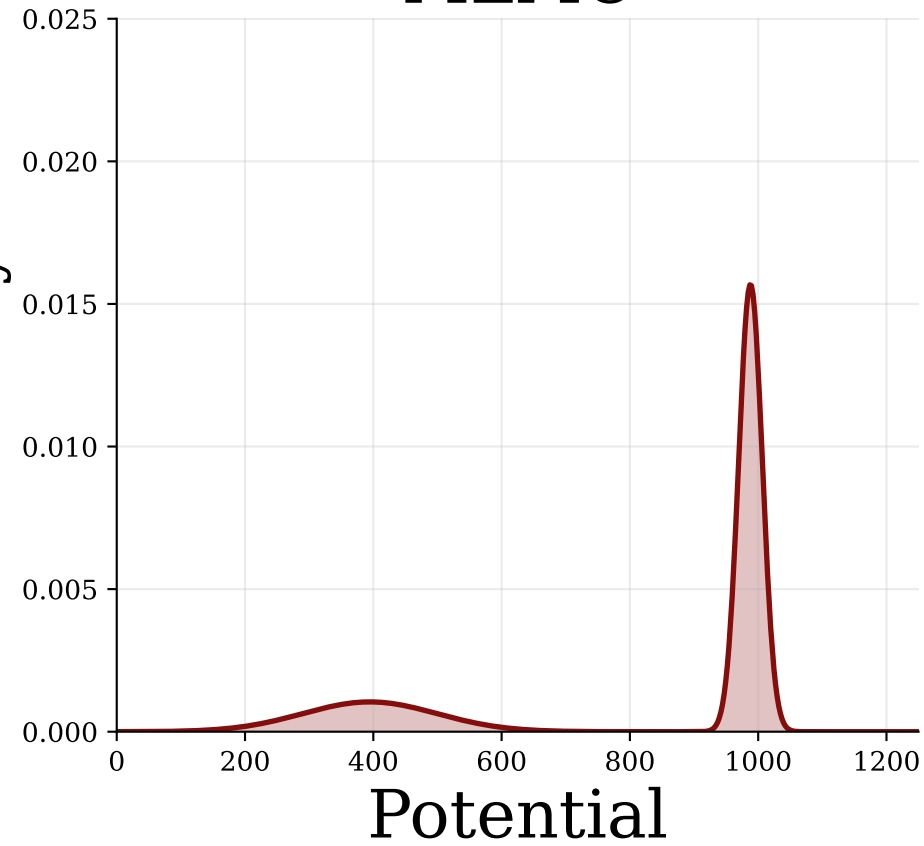

MC (high)

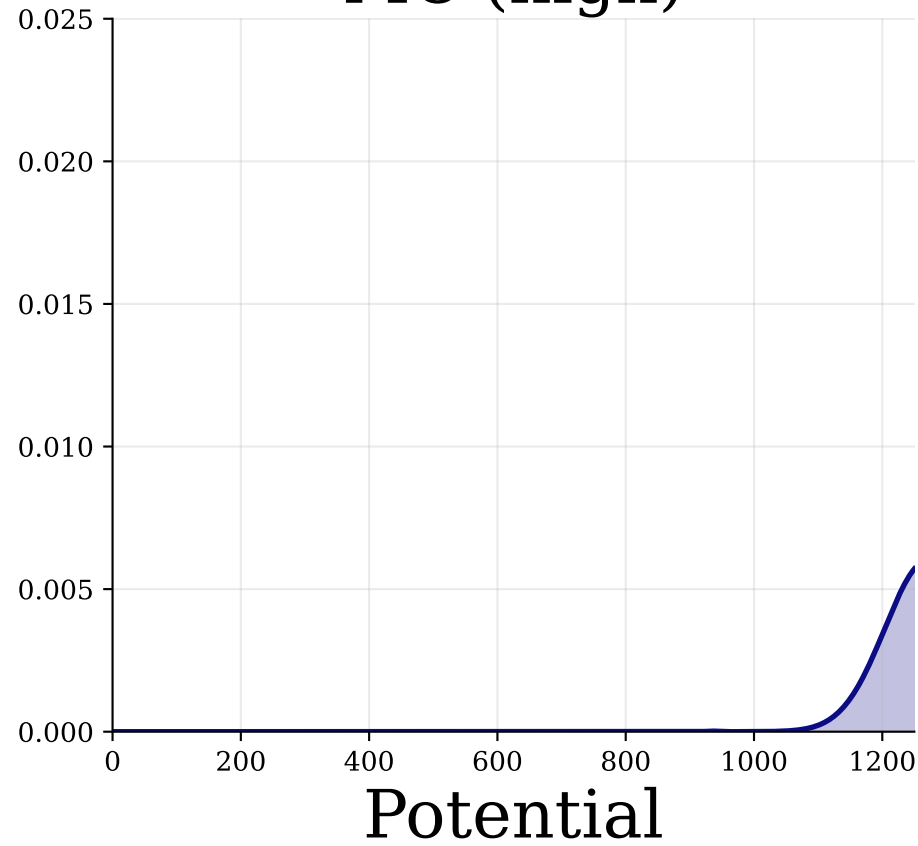

MC (medium)

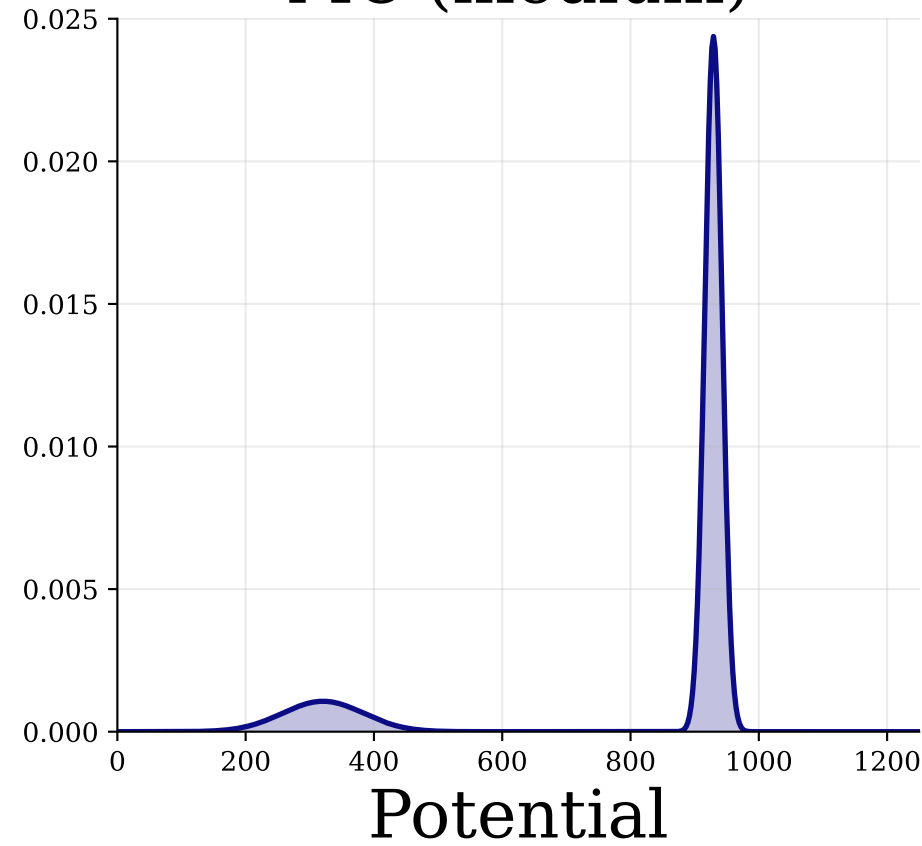

MC (low)

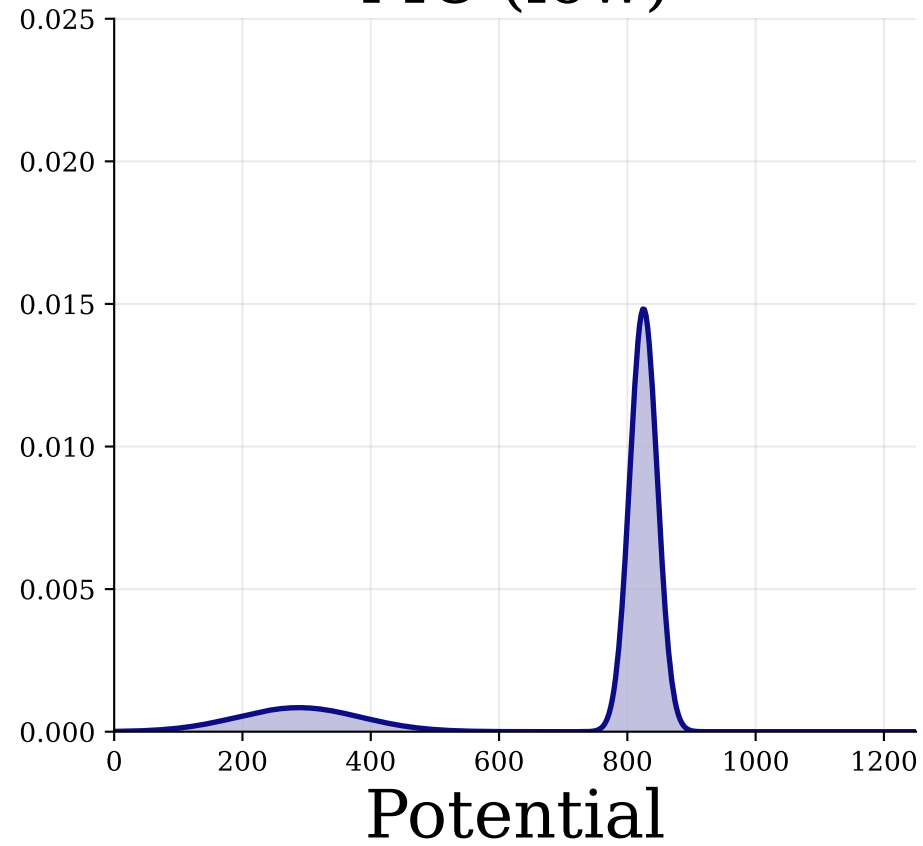

Supplement: supplementary_material [file ts_density_comparison_3_level.pdf › multilevel-sbi-main/figure/ts_density_comparison_3_level.pdf]

$\mu_\phi$  (first)

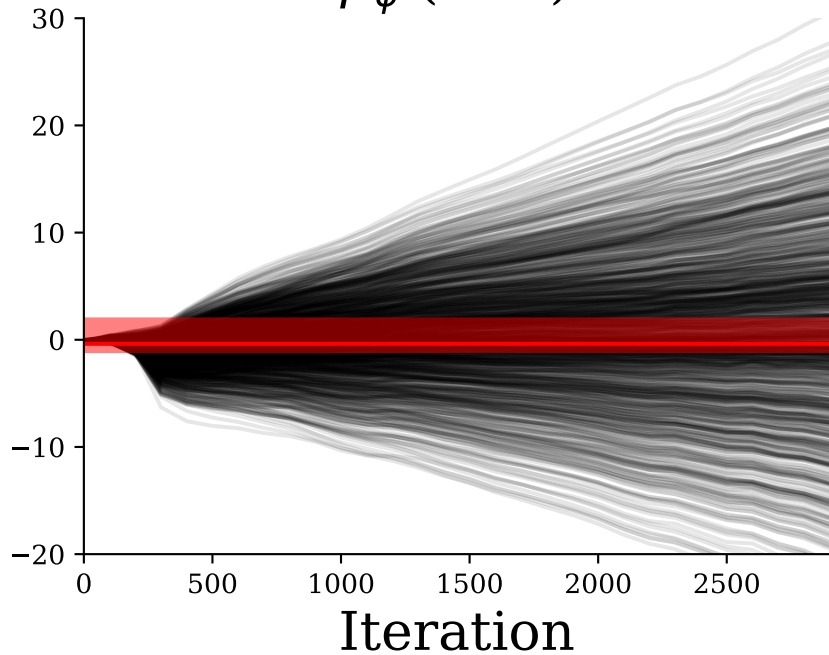

$\mu_\phi$  (second)

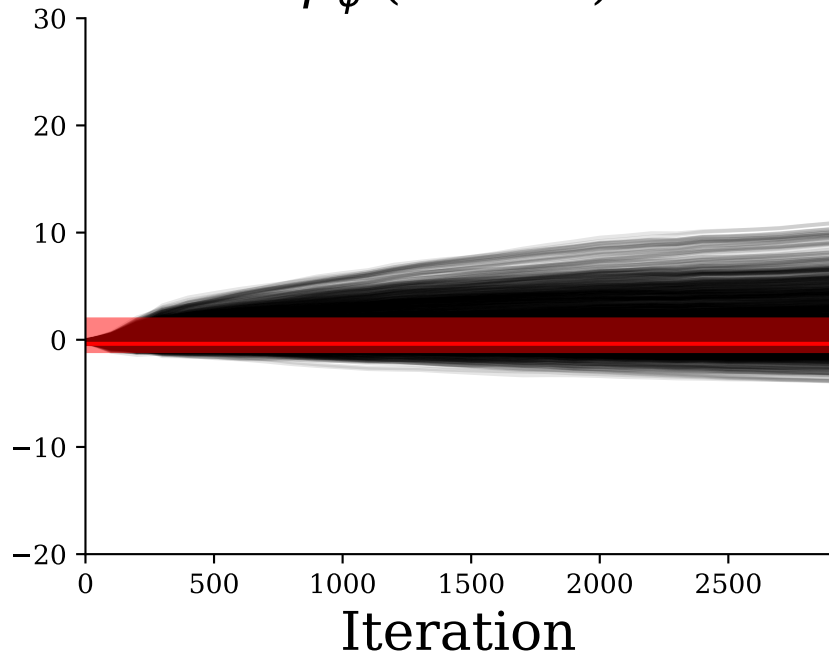

Supplement: supplementary_material [file ts_fitted_mean.pdf › multilevel-sbi-main/figure/ts_fitted_mean.pdf]

Count

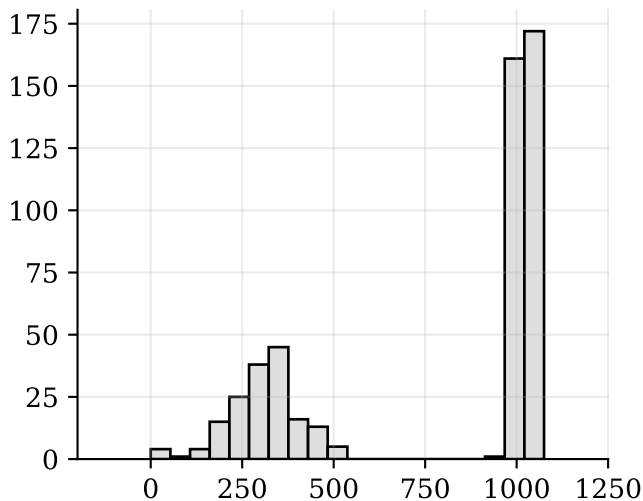

Count

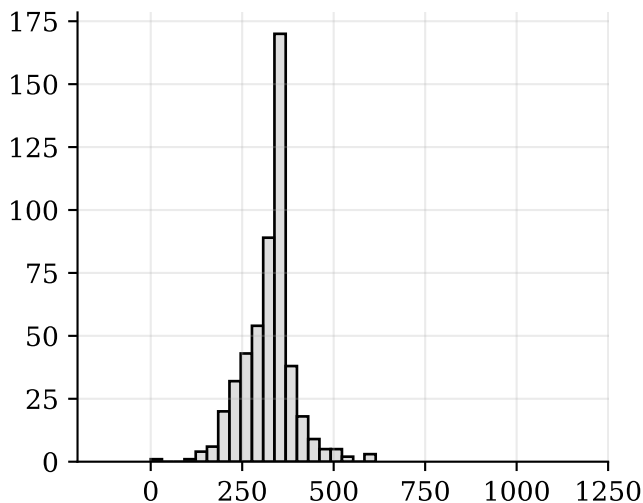

Potential

Supplement: supplementary_material [file ts_hist.pdf › multilevel-sbi-main/figure/ts_hist.pdf]

High

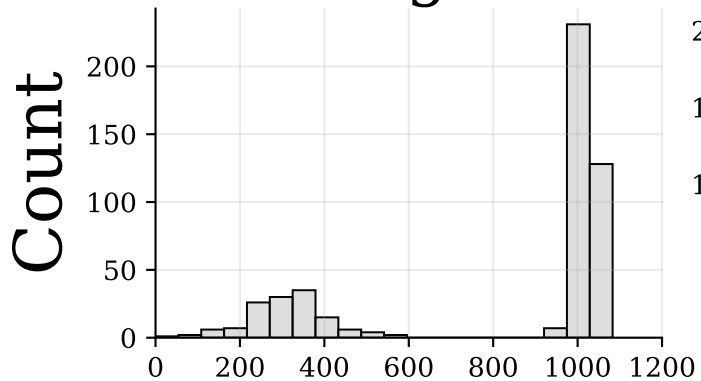

Medium

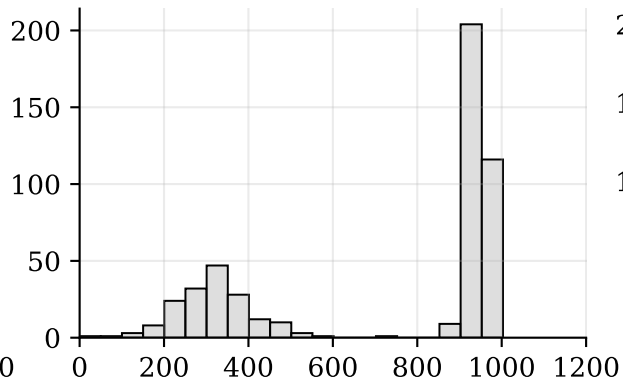

Low

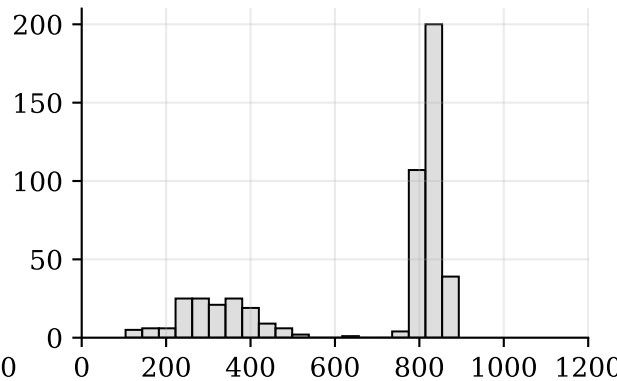

Potential

Supplement: supplementary_material [file ts_hist_3_level.pdf › multilevel-sbi-main/figure/ts_hist_3_level.pdf]

$h_0$ 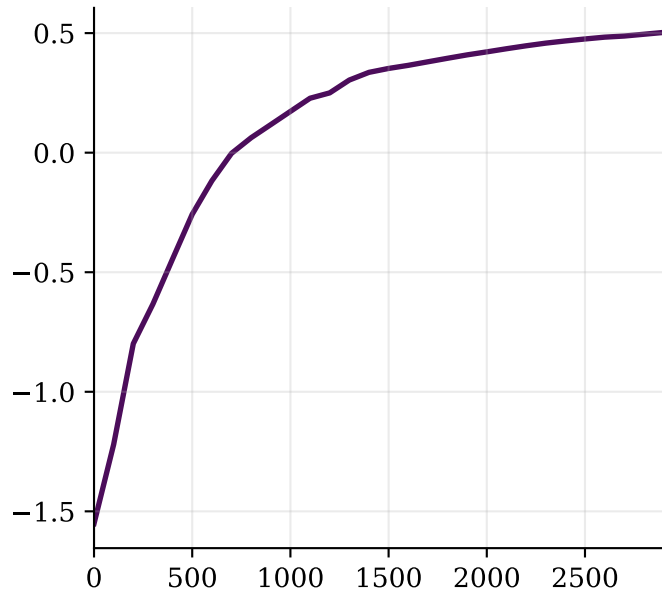

Iteration

 $h_1$ 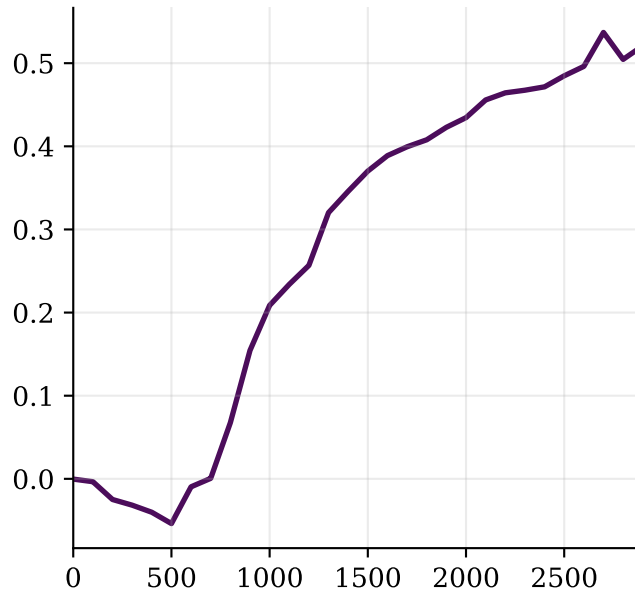

Iteration

Penalty

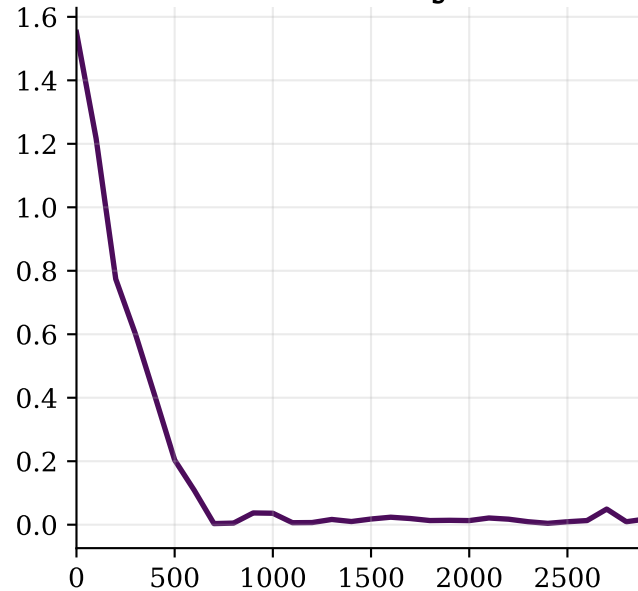

Iteration

Loss

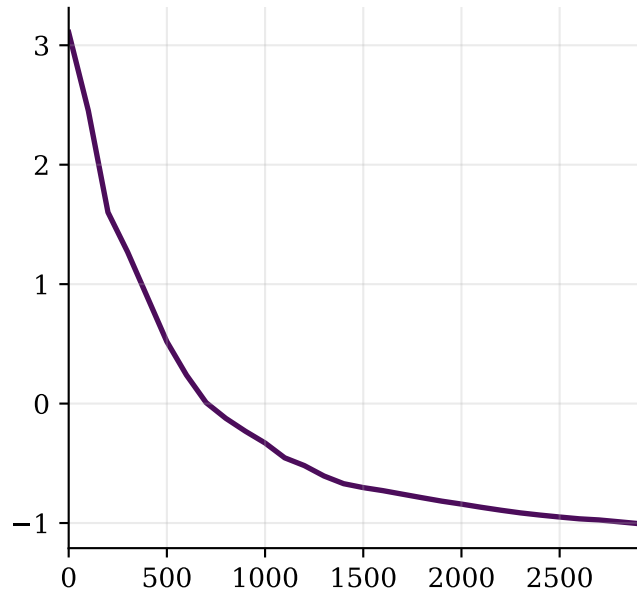

Iteration

Supplement: supplementary_material [file ts_loss_diagnostics_with_penalty.pdf › multilevel-sbi-main/figure/ts_loss_diagnostics_with_penalty.pdf]

$h_0$ 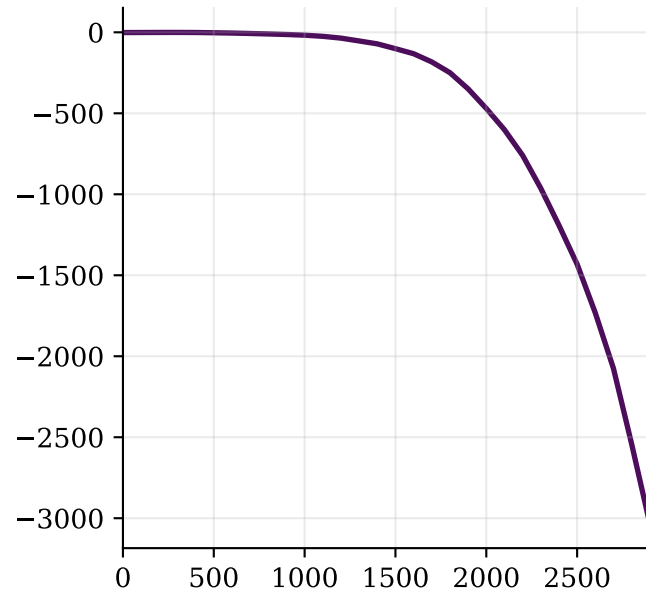

Iteration

 $h_1$ 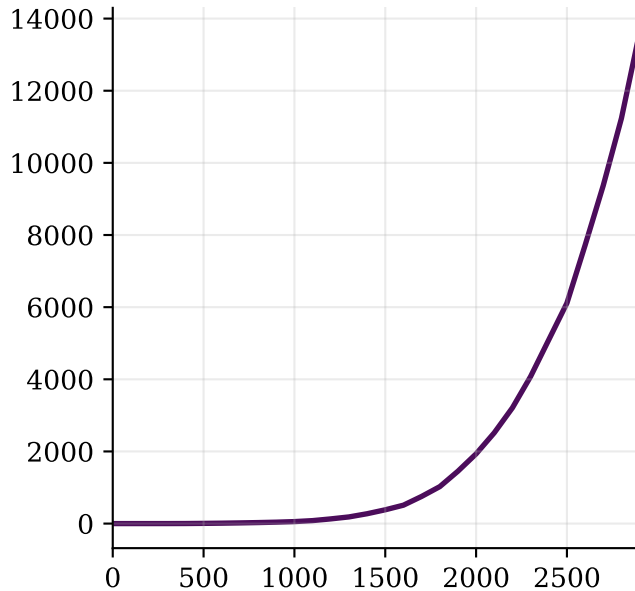

Iteration

Penalty

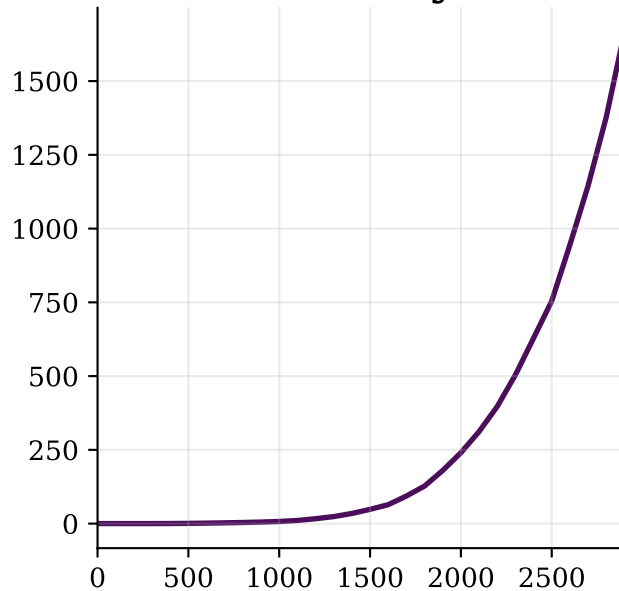

Iteration

Loss

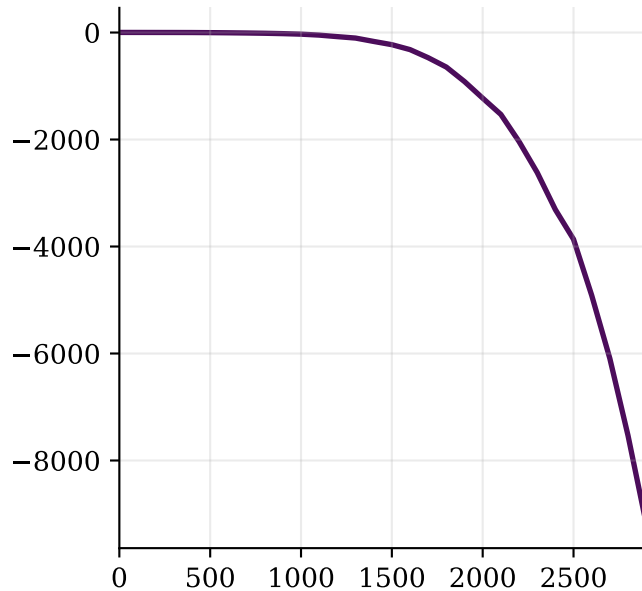

Iteration

Supplement: supplementary_material [file ts_loss_diagnostics_with_penalty_alpha_0_1.pdf › multilevel-sbi-main/figure/ts_loss_diagnostics_with_penalty_alpha_0_1.pdf]

$h_0$ 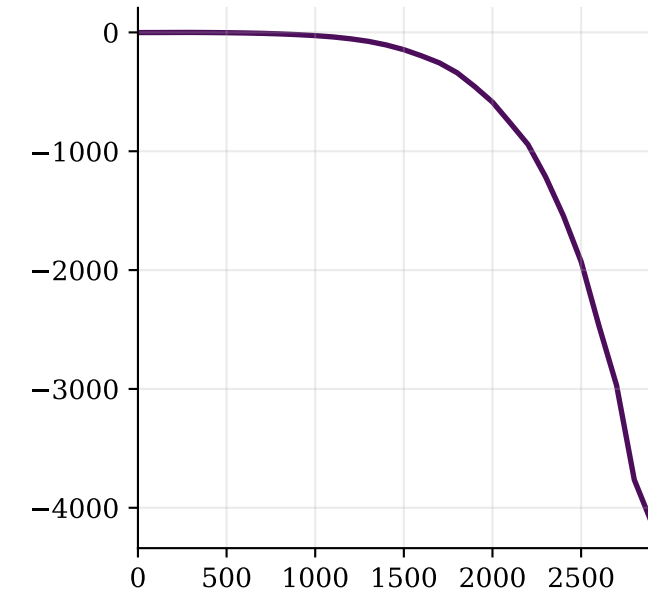

Iteration

 $h_1$ 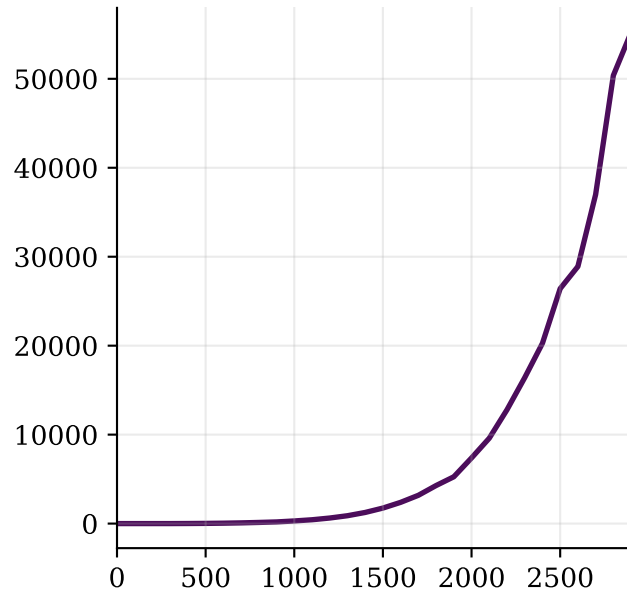

Iteration

Penalty

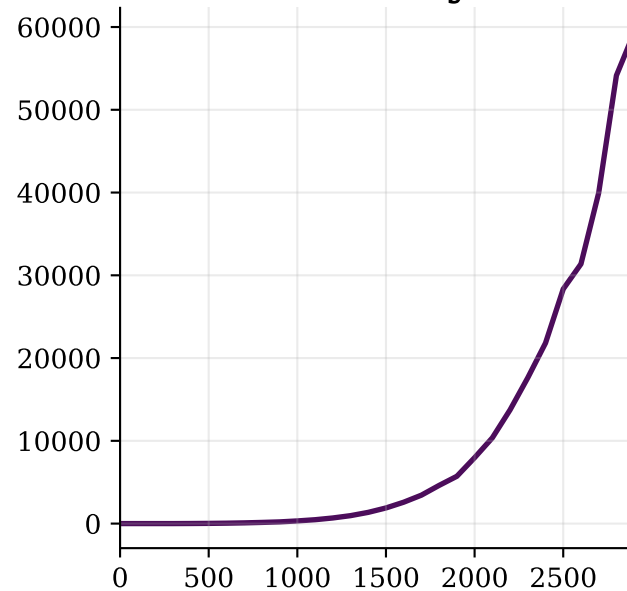

Iteration

Loss

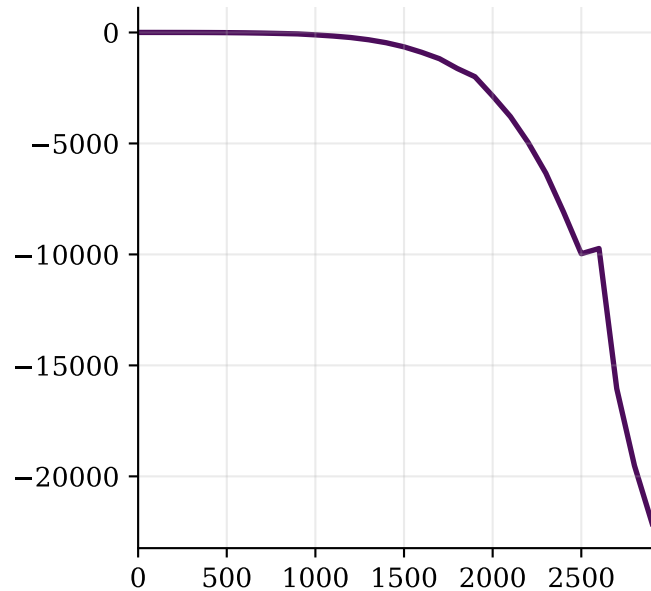

Iteration

Supplement: supplementary_material [file ts_loss_diagnostics_with_penalty_alpha_0_5.pdf › multilevel-sbi-main/figure/ts_loss_diagnostics_with_penalty_alpha_0_5.pdf]

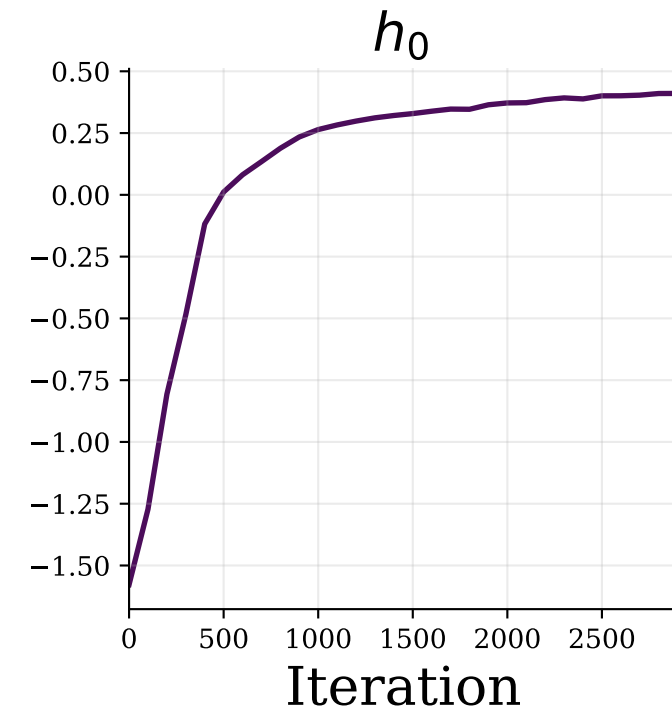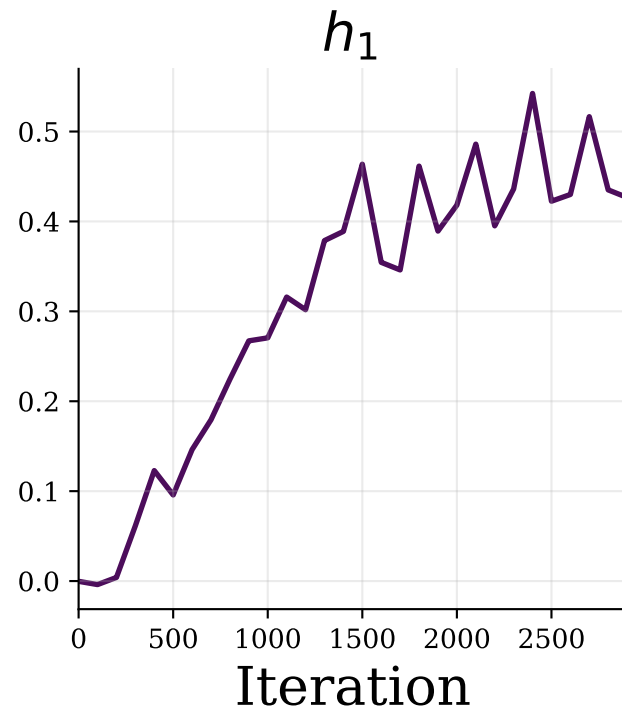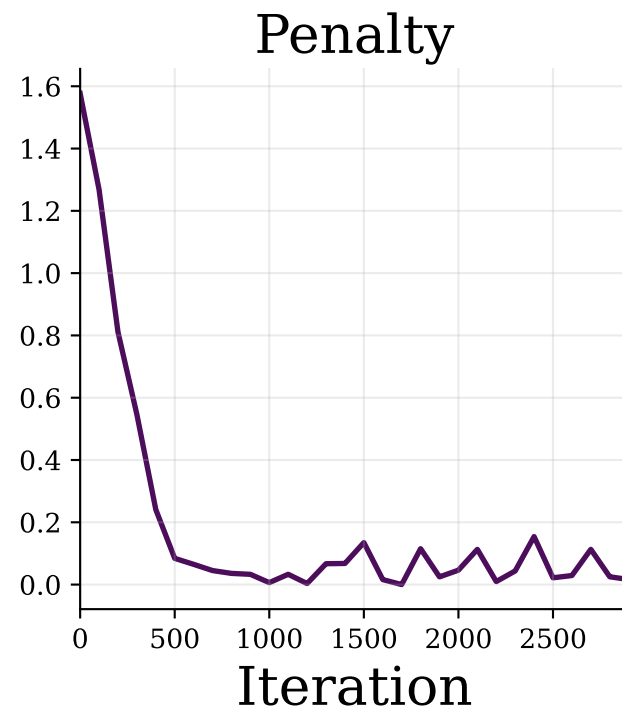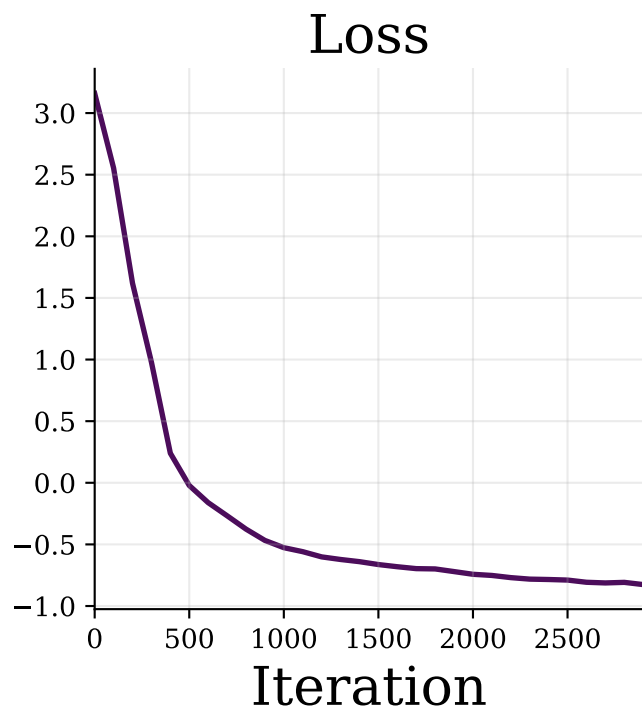

Supplement: supplementary_material [file ts_loss_diagnostics_with_penalty_alpha_1.pdf › multilevel-sbi-main/figure/ts_loss_diagnostics_with_penalty_alpha_1.pdf]

$h_0$ 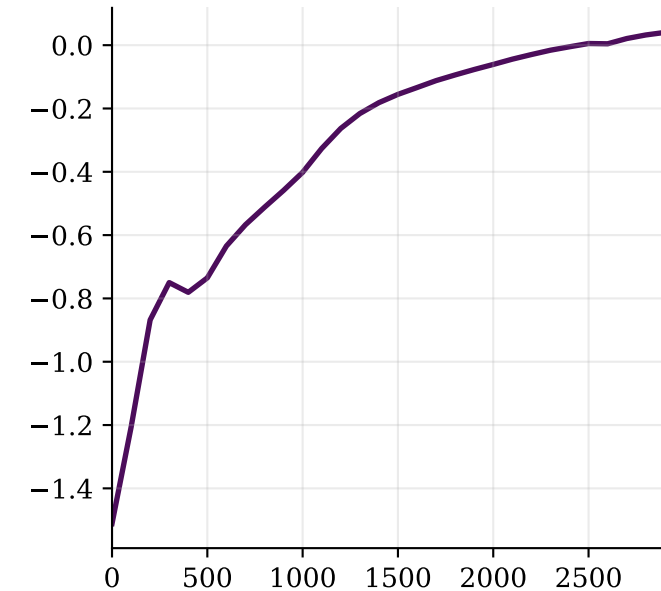

Iteration

 $h_1$ 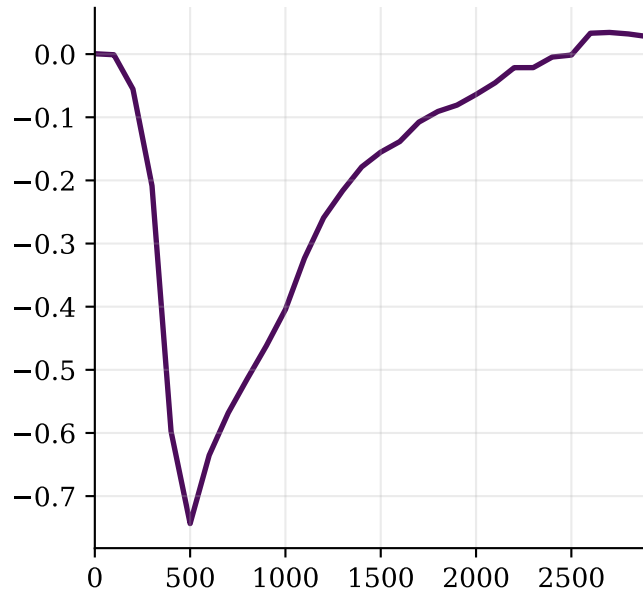

Iteration

Penalty

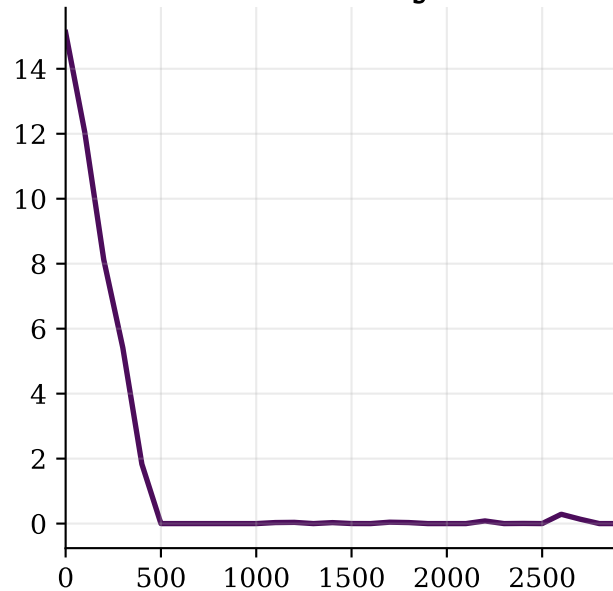

Iteration

Loss

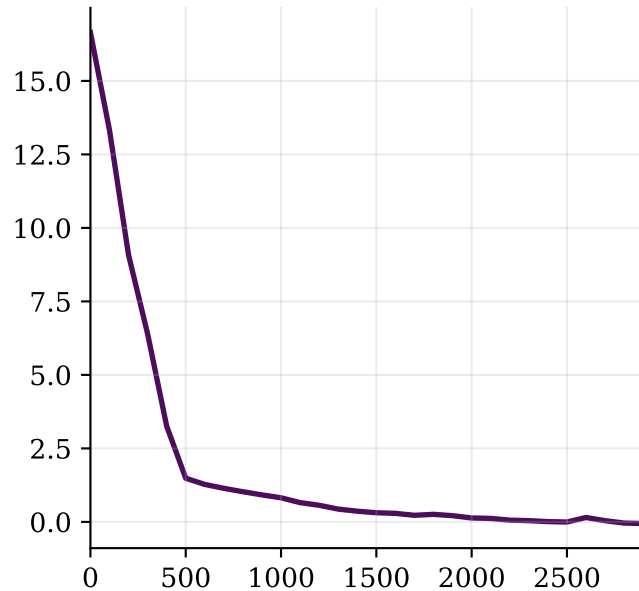

Iteration

Supplement: supplementary_material [file ts_loss_diagnostics_with_penalty_alpha_10.pdf › multilevel-sbi-main/figure/ts_loss_diagnostics_with_penalty_alpha_10.pdf]

$h_0$ 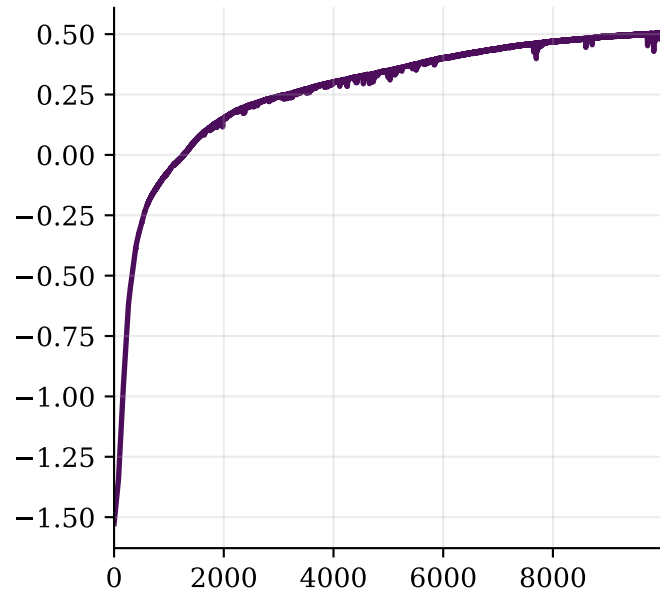

Iteration

 $h_1$ 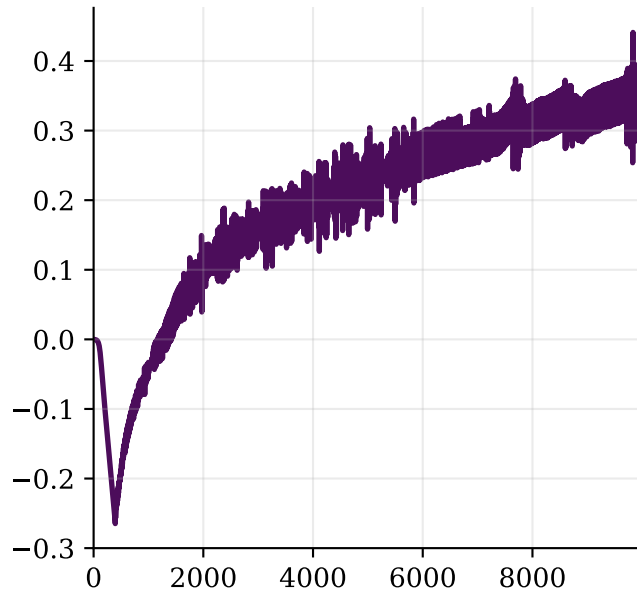

Iteration

 $\max(0, h_1 - h_0)$ 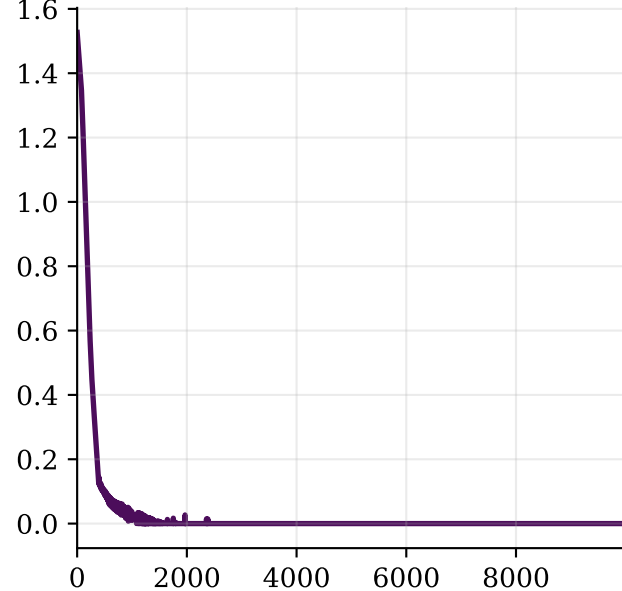

Iteration

Loss

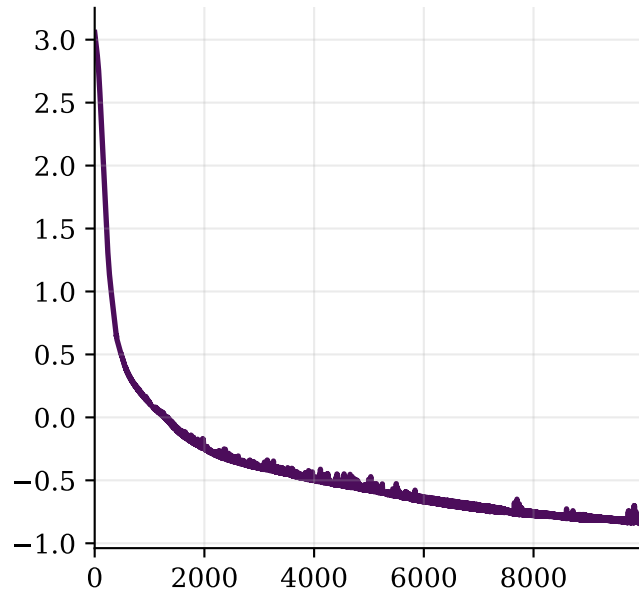

Iteration

Supplement: supplementary_material [file ts_loss_diagnostics_with_penalty_alpha_100.pdf › multilevel-sbi-main/figure/ts_loss_diagnostics_with_penalty_alpha_100.pdf]

$h_0$ 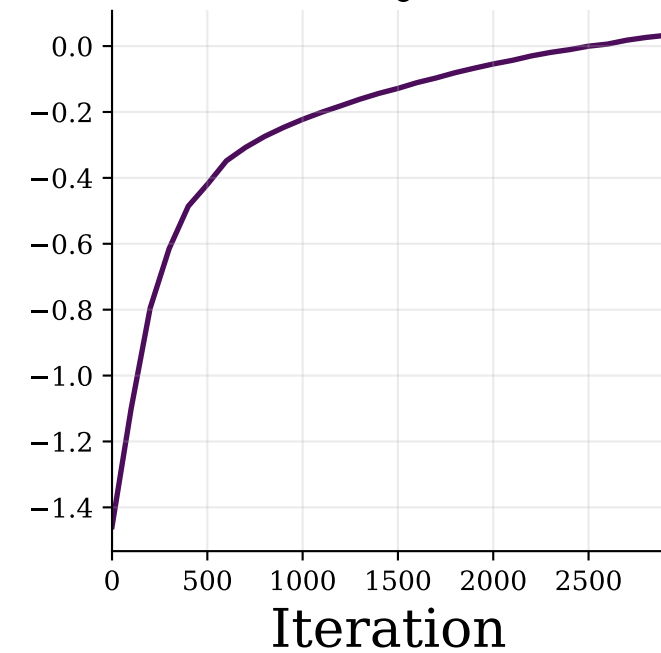 $h_1$ 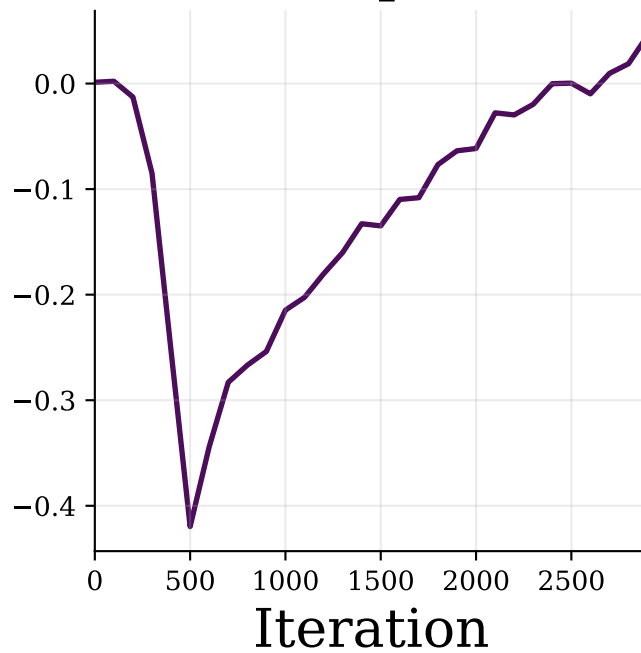

Penalty

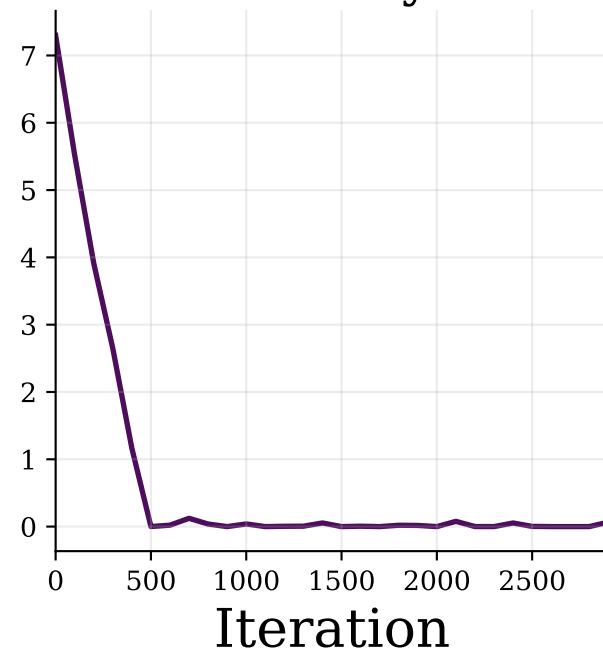

Loss

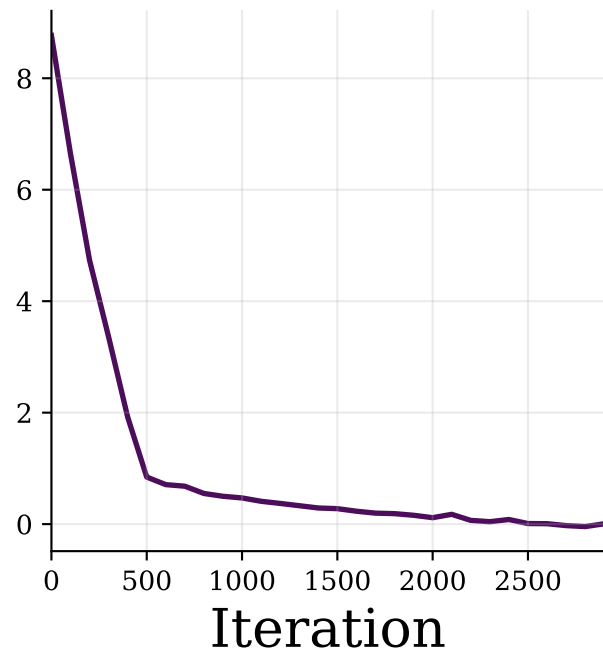

Supplement: supplementary_material [file ts_loss_diagnostics_with_penalty_alpha_5.pdf › multilevel-sbi-main/figure/ts_loss_diagnostics_with_penalty_alpha_5.pdf]

$h_0$ 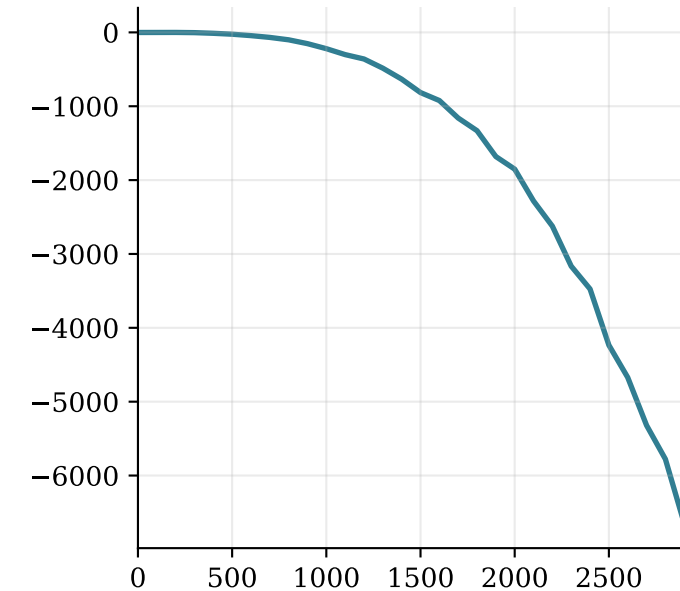

Iteration

 $h_1$ 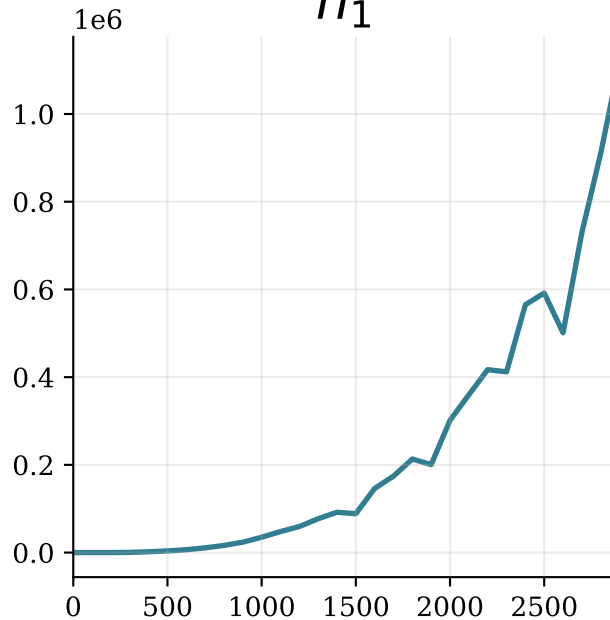

Iteration

 $h_0 + h_1$ 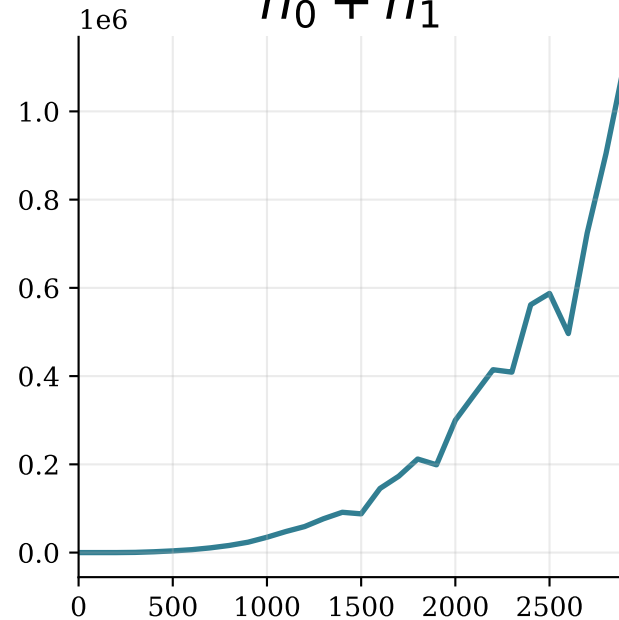

Iteration

Loss

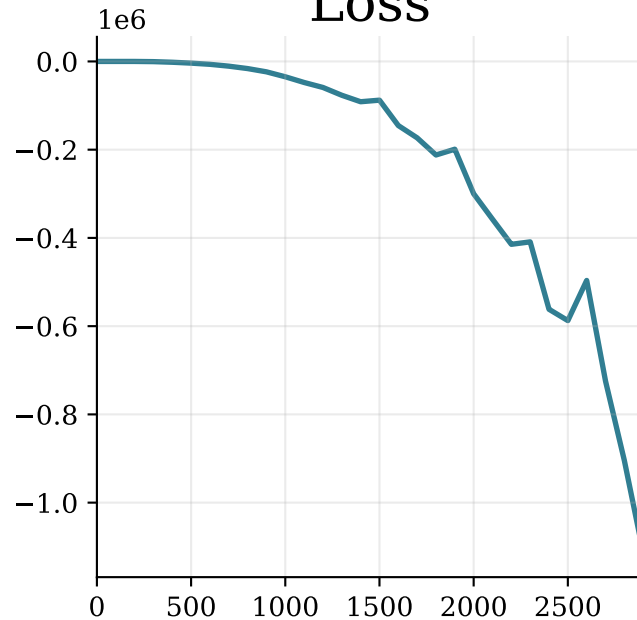

Iteration

Supplement: supplementary_material [file ts_loss_diagnostics_without_penalty.pdf › multilevel-sbi-main/figure/ts_loss_diagnostics_without_penalty.pdf]

MMD

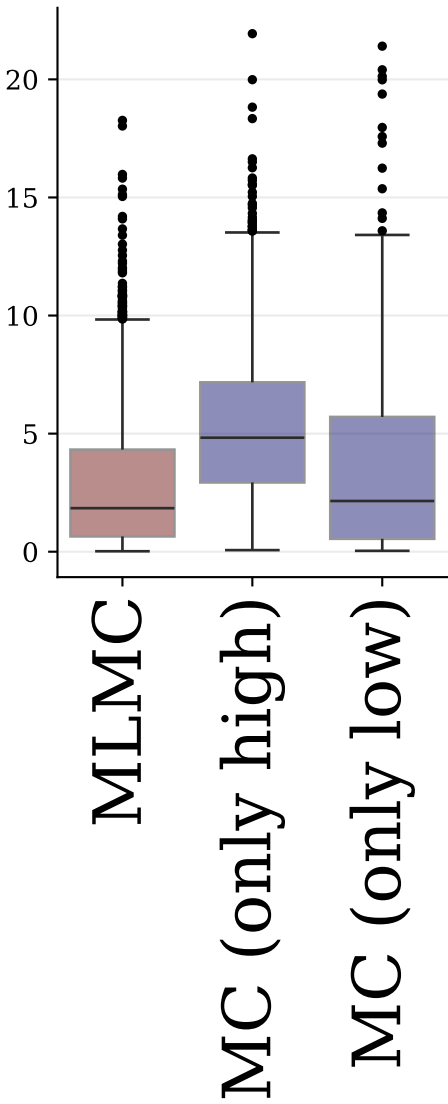

Supplement: supplementary_material [file ts_mmd_comparison.pdf › multilevel-sbi-main/figure/ts_mmd_comparison.pdf]

MMD

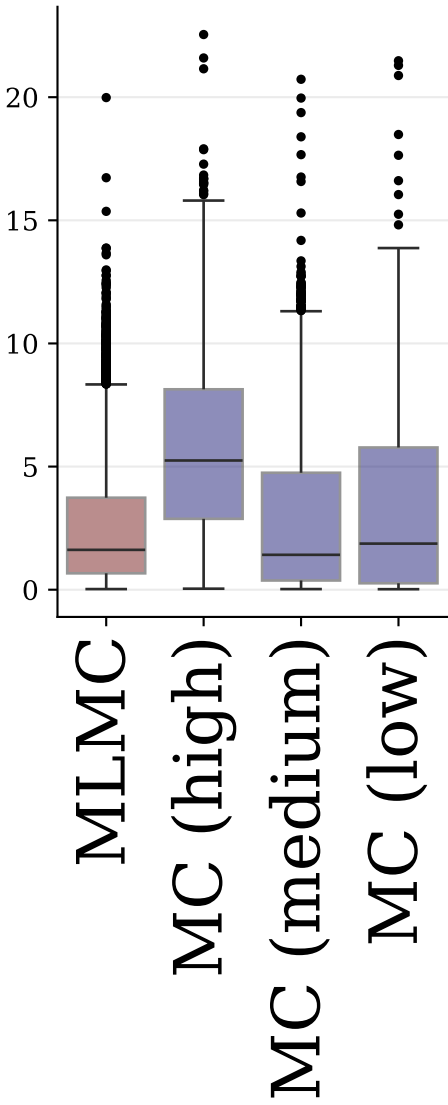

Supplement: supplementary_material [file ts_mmd_comparison_3_level.pdf › multilevel-sbi-main/figure/ts_mmd_comparison_3_level.pdf]
